# Supplementary material for: Response of Coastal Fishes to the Gulf of Mexico Oil Disaster
Source: PLoS One. 2011 Jul 6;6(7):e21609. doi: 10.1371/journal.pone.0021609 (PMC3130780; doi:10.1371/journal.pone.0021609)
Supplement: Dataset S1 — Complete CPUE data obtained for 2006–2009 trawl surveys within seagrass meadows of the northern Gulf of Mexico. (XLSX) [file pone.0021609.s014.xlsx]

## Sheet: CPUES
GOM Habitat Connectivity Trawl Records (Multi-species)																	CPUEs (fish/km towed)	1	2	3	4	5	6	7	8	9	10	11	12	13	14	15	16	17	18	19	20	21	22	23	24	25	26	27	28	29	30	31	32
																		Pomacentridae	Acanthuridae	Monacanthidae	Monacanthidae	Anguillidae	Sparidae	Ariidae	Sciaenidae	Blenniidae	Carangidae	Carangidae	Serranidae	Serranidae	Ephippidae	Chaetodontidae	Chaetodontidae	Diodontidae	Carangidae	Bothidae	Sciaenidae	Sciaenidae	Dasyatidae	Dasyatidae	Dasyatidae	Diodontidae	Serranidae	Sparidae	Echeneidae	Elopidae	Serranidae	Fundulidae	Poeciliidae
																		Abudefduf saxatilis	Acanthurus bahianus	Aluterus schoepfi	Aluterus scriptus	Anguilla rostrada	Archosargus probatocephalus	Arius felis	Bairdiella chrysoura	Blenniidae	Caranx crysos	Caranx hippos	Centropristis philadelphica	Centropristis striata	Chaetodipterus faber	Chaetodon capistratus	Chaetodon ocellatus	Chilomycterus schoepfi	Chloroscombrus chrysurus	Citharichthys sp.	Cynoscion arenarius	Cynoscion nebulosus	Dasyatis americana	Dasyatis sabina	Dasyatis say	Diodon holocanthus	Diplectrum formosum	Diplodus holbrooki	Echeneis naucrates	Elops saurus	Epinephelus morio	Fundulus sp.	Gambusia affinis
																		Sergeant Major	Surgeon, Ocean	Filefish, Orange	Filefish, Scrawled	American eel	Sheepshead	Catfish, Hardhead	Perch, Silver	Blenny	Blue runner	Jack, Common/Crevalle	Sea Bass, Rock	Sea Bass, Black	Spadefish	Butterflyfish, Foureye	Butterflyfish, Spotfin	Burrfish, Striped	Bumper, Atlantic	Whiff	Sea Trout, White	Sea Trout, Speckled	Stingray, Southern	Stingray, Atlantic	Stingray, Bluntnose	Porcupinefish	Perch, Sand	Pinfish, Spottail	Sharksucker	Ladyfish	Grouper, Red	Killifish	Mosquito Fish
Tow ID	Site	Region	Year	Context	Date	Daily Tow #	TOD	Speed (km/hr)	Duration (min)	Distance Towed (km)	Lat Start (DD)	Long Start (DD)	Depth (m)	Sal	Temp (C)	Other Notes	All Fishes	Abu sax	Aca bah	Alu sch	Alu scr	Ang ros	Arc pro	Ari fel	Bai chr	Blenniidae	Car cry	Car hip	Cen phi	Cen str	Cha fab	Cha cap	Cha oce	Chi sch	Chl chr	Cit spp	Cyn not	Cyn neb	Das ame	Das sab	Das say	Dio hol	Dip for	Dip hol	Ech nau	Elo sau	Epi mor	Fun spp	Gam aff
27	Mid Bay	Miss Sound	2006	Pre	20060720		11:52:00	3.5	2	0.116667			1.0-1.49	28.7	30.9	Bayou Heron	634.286	0	0	0	0	0	0	0	162.857	0	0	0	0	0	0	0	0	0	0	0	0	0	0	0	0	0	0	0	0	0	0	0	0
28	Mid Bay	Miss Sound	2006	Pre	20060720		11:58:00	3.5	2	0.116667			1.0-1.49	28.7	30.9	Bayou Heron	874.286	0	0	0	0	0	17.1429	0	188.571	0	0	0	0	0	0	0	0	0	0	0	0	17.1429	0	0	0	0	0	0	0	0	0	0	8.57143
29	GBS	Miss Sound	2006	Pre	20060720		12:04:00	3.5	2	0.116667	30.362	88.3795	1.0-1.49	27.2	31.2		437.143	0	0	0	0	0	0	0	102.857	0	0	0	0	0	0	0	0	8.57143	0	0	0	17.1429	0	0	0	0	0	0	0	0	0	0	0
30	GBS	Miss Sound	2006	Pre	20060720		12:10:00	3.5	2	0.116667	30.3632	88.3775	1.0-1.49	27.2	31.2		188.571	0	0	0	0	0	0	0	51.4286	0	0	0	0	0	0	0	0	0	0	0	0	8.57143	0	0	8.57143	0	0	0	0	0	0	0	0
31	GBS	Miss Sound	2006	Pre	20060720		12:20:00	3.5	2	0.116667	30.3615	88.3784	1.0-1.49	27.2	31.2		42.8571	0	0	0	0	0	0	0	0	0	0	0	0	0	0	0	0	0	0	0	0	0	0	0	0	0	0	0	0	0	0	0	0
32	GBS	Miss Sound	2006	Pre	20060720		12:36:00	3.5	2	0.116667	30.3668	88.3699	1.0-1.49	27.2	31.2		591.429	0	0	0	0	0	0	0	102.857	0	0	0	0	0	0	0	0	0	0	0	0	25.7143	0	0	0	0	0	0	0	0	0	0	0
33	GBS	Miss Sound	2006	Pre	20060720		12:42:00	3.5	2	0.116667	30.3684	88.3684	1.0-1.49	27.2	31.2		2340	0	0	0	0	0	8.57143	0	1465.71	17.1429	0	0	0	0	0	0	0	8.57143	0	0	0	231.429	0	0	34.2857	0	8.57143	0	0	0	0	0	0
34	GBS	Miss Sound	2006	Pre	20060720		12:51:00	3.5	2	0.116667	30.3697	88.3664	1.0-1.49	27.2	31.2		2477.14	0	0	0	0	0	0	8.57143	1971.43	0	0	0	0	0	0	0	0	8.57143	0	0	0	188.571	0	0	0	0	0	0	0	0	0	0	0
35	GBS	Miss Sound	2006	Pre	20060720		12:36:00	3.5	2	0.116667	30.3697	88.3641	1.0-1.49	27.2	31.2		3951.43	0	0	0	0	0	0	0	2957.14	8.57143	0	0	0	0	8.57143	0	0	25.7143	8.57143	0	0	360	0	0	0	0	0	0	8.57143	0	0	0	0
36	PAP	Miss Sound	2006	Pre	20060720		13:36:00	3.5	2	0.116667	30.3789	88.3117	1.0-1.49	27.2	31.2		2271.43	0	0	0	0	0	0	0	831.429	17.1429	0	0	0	0	0	0	0	8.57143	0	8.57143	0	462.857	0	0	0	0	0	0	0	0	0	0	0
37	PAP	Miss Sound	2006	Pre	20060721		09:19:00	3.5	2	0.116667			1.0-1.49	29.4	30.1		222.857	0	0	0	0	0	17.1429	0	17.1429	0	0	0	0	0	0	0	0	0	0	0	0	8.57143	0	0	0	0	0	0	0	0	0	0	0
38	PAP	Miss Sound	2006	Pre	20060721		09:34:00	3.5	2	0.116667			1.0-1.49	29.4	30.1		325.714	0	0	0	0	0	0	0	42.8571	0	0	0	0	0	0	0	0	8.57143	0	0	0	0	0	0	0	0	0	0	0	0	0	0	0
39	PAP	Miss Sound	2006	Pre	20060721		09:46:00	3.5	2	0.116667			1.0-1.49	29.4	30.1		634.286	0	0	0	0	0	8.57143	0	180	0	0	0	0	0	0	0	0	0	0	0	0	34.2857	0	0	0	0	0	0	0	0	0	0	0
40	Mid Bay	Miss Sound	2006	Pre	20060721		09:58:00	3.5	2	0.116667			1.0-1.49	29.4	30.1		137.143	0	0	0	0	0	0	0	68.5714	0	0	0	0	0	0	0	0	8.57143	0	0	0	0	0	0	0	0	0	0	0	0	0	0	0
41	Mid Bay	Miss Sound	2006	Pre	20060721		10:24:00	3.5	2	0.116667			1.0-1.49	29.4	30.1		257.143	0	0	0	0	0	0	0	60	0	0	0	0	0	0	0	0	0	0	0	0	0	0	0	0	0	0	0	0	0	0	0	25.7143
42	Mid Bay	Miss Sound	2006	Pre	20060721		10:50:00	3.5	2	0.116667			1.0-1.49	29.4	30.1		805.714	0	0	0	0	0	0	0	8.57143	0	0	0	0	0	0	0	0	8.57143	0	0	0	0	0	0	0	0	0	0	0	0	0	0	0
43	Mid Bay	Miss Sound	2006	Pre	20060721		11:16:00	3.5	2	0.116667			1.0-1.49	29.4	30.1		548.571	0	0	0	0	0	68.5714	0	34.2857	0	0	0	0	0	0	0	0	0	0	0	0	0	0	0	0	0	0	0	0	0	0	0	0
44	Mid Bay	Miss Sound	2006	Pre	20060721		11:42:00	3.5	2	0.116667			1.0-1.49	29.4	30.1		171.429	0	0	0	0	0	0	0	0	0	0	0	0	0	0	0	0	8.57143	0	0	0	8.57143	0	0	0	0	0	0	0	0	0	0	0
45	Mid Bay	Miss Sound	2006	Pre	20060721		12:08:00	3.5	2	0.116667			1.0-1.49	29.4	30.1		214.286	0	0	0	0	0	0	0	8.57143	0	0	0	0	0	0	0	0	0	0	0	0	0	0	0	0	0	0	0	0	0	0	0	0
46	Mid Bay	Miss Sound	2006	Pre	20060721		12:34:00	3.5	2	0.116667			1.0-1.49	29.4	30.1		565.714	0	0	0	0	0	0	0	17.1429	0	0	0	0	0	0	0	0	0	0	0	0	17.1429	0	0	0	0	0	0	0	0	0	0	0
47	PAP	Miss Sound	2006	Pre	20060721		11:34:00	3.5	2	0.116667			1.0-1.49	29.4	30.1		2734.29	0	0	0	0	0	0	0	1071.43	8.57143	0	0	0	0	0	0	0	0	0	0	0	222.857	0	0	0	0	0	0	0	0	0	0	0
48	PB Is	Gulf Is	2006	Pre	20060801		09:40:00	3.5	2	0.116667			1.0-1.49	31.3	29		642.857	0	0	0	0	0	0	0	0	0	0	0	0	0	0	0	0	0	0	0	0	0	0	0	0	0	0	0	0	0	0	0	0
49	PB Is	Gulf Is	2006	Pre	20060801		08:52:00	3.5	2	0.116667			1.0-1.49	31.3	29		1500	0	0	0	0	0	0	0	0	0	0	0	0	0	0	0	0	0	0	0	0	0	0	0	0	0	0	0	0	0	0	0	0
50	PB Is	Gulf Is	2006	Pre	20060801		09:52:00	3.5	2	0.116667			1.0-1.49	31.3	29		1062.86	8.57143	0	0	0	0	0	0	68.5714	0	0	0	0	0	0	0	0	0	0	0	0	0	0	0	0	0	0	0	0	0	0	0	0
51	PB Is	Gulf Is	2006	Pre	20060801		10:52:00	3.5	2	0.116667			1.0-1.49	31.3	29		994.286	0	0	0	0	0	0	0	51.4286	0	0	0	0	0	0	0	0	17.1429	0	0	0	0	0	0	0	0	8.57143	0	0	0	0	0	0
52	PB Is	Gulf Is	2006	Pre	20060801		10:17:00	3.5	2	0.116667			1.0-1.49	31.3	29		420	0	0	0	0	0	0	0	0	0	0	0	0	0	0	0	0	8.57143	0	0	0	0	0	0	0	0	0	0	0	0	0	0	0
53	PB Is	Gulf Is	2006	Pre	20060801		10:36:00	3.5	2	0.116667			1.0-1.49	31.6	30		1020	0	0	0	0	0	0	0	8.57143	0	0	0	0	0	0	0	0	8.57143	0	0	0	0	0	0	0	0	0	0	0	0	0	0	0
54	PB Is	Gulf Is	2006	Pre	20060801		10:55:00	3.5	2	0.116667			1.0-1.49	31.6	30.1		1062.86	0	0	0	0	0	0	8.57143	17.1429	0	0	0	0	0	0	0	0	8.57143	0	8.57143	0	0	0	0	0	0	0	0	0	0	0	0	0
55	PB Is	Gulf Is	2006	Pre	20060801		11:14:00	3.5	2	0.116667			1.0-1.49	31.6	30.2		1380	0	0	0	0	0	0	0	25.7143	0	0	0	0	0	0	0	0	8.57143	0	0	0	0	0	0	0	0	0	0	0	0	0	0	0
56	PB Is	Gulf Is	2006	Pre	20060801		11:33:00	3.5	2	0.116667			1.0-1.49	31.6	30.3		728.571	0	0	0	0	0	0	0	8.57143	0	0	0	0	0	0	0	0	0	0	0	0	0	0	0	0	0	0	0	0	0	0	0	0
57	PAP	Miss Sound	2006	Pre	20060801		11:48:00	3.5	2	0.116667			1.0-1.49	26.3	29.3		1062.86	0	0	0	0	0	0	0	282.857	8.57143	0	0	0	0	0	0	0	0	0	8.57143	0	102.857	0	0	0	0	0	0	0	0	0	0	0
58	PAP	Miss Sound	2006	Pre	20060801		12:03:00	3.5	2	0.116667			1.0-1.49	26.3	29.3		471.429	0	0	0	0	0	0	0	94.2857	0	0	0	0	0	0	0	0	0	0	0	0	137.143	0	0	0	0	0	0	0	0	0	0	0
59	PAP	Miss Sound	2006	Pre	20060801		12:18:00	3.5	2	0.116667			1.0-1.49	26.3	29.3		445.714	0	0	0	0	0	0	0	94.2857	0	0	0	0	0	0	0	0	8.57143	0	0	0	8.57143	0	0	0	0	0	0	0	0	0	0	0
60	PAP	Miss Sound	2006	Pre	20060801		12:33:00	3.5	2	0.116667			1.0-1.49	26.3	29.3		917.143	0	0	0	0	0	8.57143	0	265.714	8.57143	0	0	0	0	0	0	0	8.57143	0	0	0	265.714	0	0	0	0	0	0	0	0	0	0	0
61	PAP	Miss Sound	2006	Pre	20060801		12:48:00	3.5	2	0.116667			1.0-1.49	26.3	29.3		334.286	0	0	0	0	0	0	0	0	0	0	0	0	0	0	0	0	0	0	0	0	0	0	0	0	0	0	0	0	0	0	0	0
62	Horn Is	Gulf Is	2006	Pre	20060816	1	10:18:00	3.5	3	0.175	30.2319	88.6342	1.0-1.49	33	28.9		80	0	0	0	0	0	0	17.1429	0	0	0	0	0	0	0	0	0	0	0	0	0	0	0	0	0	0	5.71429	0	0	0	0	0	0
63	Horn Is	Gulf Is	2006	Pre	20060816	2	10:29:00	3.5	3	0.175	30.2322	88.6367	<1.0	33	28.9		222.857	0	0	0	0	0	0	5.71429	22.8571	0	0	0	0	0	0	0	0	0	0	0	0	5.71429	0	0	0	0	0	0	0	0	0	0	0
64	Horn Is	Gulf Is	2006	Pre	20060816	3	10:40:00	4	3	0.2	30.2322	88.6394	<1.0	33	29.4		390	0	0	0	0	0	0	5	30	0	0	0	0	0	0	0	5	0	0	0	0	0	0	0	0	0	0	0	0	0	0	0	0
65	Horn Is	Gulf Is	2006	Pre	20060816	4	10:52:00	4	3	0.2	30.2328	88.6414	<1.0	33	29.6		325	0	0	0	0	0	0	5	5	0	0	0	0	0	0	0	0	0	0	0	0	5	0	0	0	0	0	0	0	0	0	0	0
66	Horn Is	Gulf Is	2006	Pre	20060816	5	11:08:00	3.5	3	0.175	30.2169	88.6428	<1.0	33	30.2		622.857	0	0	0	0	0	0	5.71429	108.571	0	0	0	0	0	0	0	0	0	0	0	0	5.71429	0	0	0	0	0	0	0	0	0	0	0
67	Horn Is	Gulf Is	2006	Pre	20060816	6	11:26:00	4	6	0.4	30.2189	88.6481	<1.0	33	30.6		327.5	0	0	0	0	0	0	7.5	10	0	0	0	0	0	0	0	0	5	0	0	0	0	0	0	0	0	0	0	0	0	0	0	0
68	Horn Is	Gulf Is	2006	Pre	20060816	7	11:40:00	3.5	3	0.175	30.2192	88.6503	<1.0	33	31		880	0	0	0	0	0	0	0	45.7143	0	0	0	0	0	0	0	0	17.1429	0	0	0	0	0	0	0	0	0	0	0	0	0	0	0
69	Horn Is	Gulf Is	2006	Pre	20060816	8	11:50:00	4	3	0.2	30.235	88.6522	1.0-1.49	33	31.1		225	0	0	0	0	0	0	0	10	0	0	0	0	0	0	0	0	10	0	0	0	0	0	0	0	0	0	0	0	0	0	0	0
70	Horn Is	Gulf Is	2006	Pre	20060816	9	12:03:00	4	3	0.2	30.235	88.6547	1.0-1.49	33	31.2		435	0	0	0	0	0	0	5	40	0	0	0	0	0	0	0	0	5	0	0	0	5	0	0	0	0	0	0	0	0	0	0	0
71	Horn Is	Gulf Is	2006	Pre	20060816	10	12:12:00	4	3	0.2	30.2347	88.6567	<1.0	33	31.2		270	0	0	0	0	0	0	5	110	0	0	0	0	0	0	0	0	0	0	0	5	5	0	0	0	0	0	0	0	0	0	0	0
72	Horn Is	Gulf Is	2006	Pre	20060816	11	12:20:00	4	3	0.2	30.2353	88.6583	<1.0	33	31.2		245	0	0	0	0	0	0	20	85	0	0	0	5	0	5	0	0	10	0	0	0	0	0	0	0	0	0	0	0	0	0	0	0
73	Horn Is	Gulf Is	2006	Pre	20060816	12	12:29:00	3.5	3	0.175	30.2356	88.6608	<1.0	33	31.3		354.286	0	0	0	0	0	5.71429	0	74.2857	0	0	0	0	0	0	0	0	0	0	0	0	17.1429	0	0	0	0	0	0	0	0	0	0	0
74	Horn Is	Gulf Is	2006	Pre	20060816	13	12:58:00	4	3	0.2	30.2417	88.6761	<1.0	33	31.8		325	0	0	0	0	0	0	5	135	0	0	0	0	0	0	0	0	5	0	0	0	0	0	0	0	0	0	0	0	0	0	0	0
75	Horn Is	Gulf Is	2006	Pre	20060816	14	13:07:00	3.5	3	0.175	30.2431	88.6786	<1.0	33	31.8		291.429	0	0	0	0	0	0	5.71429	28.5714	0	0	0	0	0	0	0	0	11.4286	0	5.71429	0	0	0	0	0	0	0	0	0	0	0	0	0
76	Horn Is	Gulf Is	2006	Pre	20060816	15	13:18:00	3.5	3	0.175	30.2439	88.6811	<1.0	33	31.8		308.571	0	0	0	0	0	0	5.71429	74.2857	5.71429	0	0	0	0	5.71429	0	0	17.1429	0	0	0	0	0	0	0	0	0	0	0	0	0	0	0
77	Horn Is	Gulf Is	2006	Pre	20060816	16	13:28:00	3.5	3	0.175	30.2436	88.6836	<1.0	33	31.6		840	0	0	0	0	0	0	0	428.571	0	0	0	0	0	0	0	0	51.4286	0	0	0	5.71429	0	0	0	0	0	0	0	0	0	0	0
78	PAP	Miss Sound	2006	Pre	20060817	1	09:24:00	2.5	2	0.0833333	30.3747	88.3147	1.0-1.49	33	30.7	Heavy Drift Algae	72	0	0	0	0	0	0	0	0	0	0	0	0	0	0	0	0	0	0	0	0	0	0	0	0	0	0	0	0	0	0	0	0
79	PAP	Miss Sound	2006	Pre	20060817	2	09:30:00	2.5	1.5	0.0625	30.3758	88.3128	<1.0	33	30.8	Heavy Drift Algae	784	0	0	0	0	0	0	16	64	0	0	0	0	0	0	0	0	16	0	0	0	144	0	0	0	0	0	0	0	0	0	0	0
80	PAP	Miss Sound	2006	Pre	20060817	3	09:43:00	2	1.5	0.05	30.3767	88.3125	<1.0	33	30.7		1040	0	0	0	0	0	0	0	140	0	0	0	0	0	0	0	0	20	0	0	0	20	0	20	0	0	0	0	0	0	0	0	0
81	PAP	Miss Sound	2006	Pre	20060817	4	10:25:00	2.5	2	0.0833333	30.3778	88.3114	<1.0	33	30.9		2088	0	0	0	0	0	12	0	492	12	0	0	0	0	0	0	0	0	0	0	0	120	0	0	0	0	0	0	0	0	0	0	0
82	PAP	Miss Sound	2006	Pre	20060817	5	11:07:00	2	1.5	0.05	30.3767	88.3119	<1.0	33	31		1520	0	0	0	0	0	0	0	160	0	0	0	0	0	0	0	0	60	0	0	0	120	0	0	0	0	0	0	0	0	0	0	0
83	PAP	Miss Sound	2006	Pre	20060817	6	11:30:00	2	1	0.0333333	30.3783	88.2947	<1.0	33	31.3		3330	0	0	0	0	0	30	0	450	60	0	0	0	0	0	0	0	30	0	0	0	180	0	30	0	0	0	0	0	0	0	0	0
84	PAP	Miss Sound	2006	Pre	20060817	7	11:51:00	2.2	1	0.0366667	30.3669	88.2989	<1.0	33	31.4		2127.27	0	0	0	0	0	0	0	327.273	0	0	0	0	0	0	0	0	0	0	27.2727	0	272.727	0	81.8182	0	0	0	0	0	0	0	0	0
105	Ship Is	Gulf Is	2006	Pre	20060825	1	10:50:00	3.5	2	0.116667	30.2461	88.8794	1.0-1.49	33	30.3		317.143	0	0	0	0	0	0	0	0	0	0	0	0	0	0	0	0	8.57143	0	0	0	0	0	0	0	0	0	0	0	0	0	0	0
106	Ship Is	Gulf Is	2006	Pre	20060825	2	10:56:00	3.5	2	0.116667	30.245	88.8811	1.0-1.49	33	30.2		137.143	0	0	0	0	0	0	0	0	0	0	8.57143	0	0	0	0	0	0	0	0	0	0	0	0	0	0	0	0	0	0	0	0	0
107	Ship Is	Gulf Is	2006	Pre	20060825	3	11:02:00	4.5	2	0.15	30.2442	88.8825	1.0-1.49	33	30.3		280	0	0	0	0	0	0	0	0	0	0	0	0	0	0	0	0	0	0	0	0	0	0	0	0	0	0	0	0	0	0	0	0
108	Ship Is	Gulf Is	2006	Pre	20060825	4	11:09:00	4.5	2	0.15	30.2431	88.8839	1.0-1.49	33	30.3		686.667	0	0	0	0	0	0	0	13.3333	0	0	0	0	0	0	0	0	13.3333	0	0	0	13.3333	0	0	0	0	0	0	0	0	0	0	0
109	Ship Is	Gulf Is	2006	Pre	20060825	5	11:19:00	4	4	0.266667	30.2422	88.8853	<1.0	33	29.9		172.5	0	0	0	0	0	0	0	7.5	0	0	0	0	0	0	0	0	0	0	0	0	3.75	0	0	0	0	0	0	0	0	0	0	0
110	Ship Is	Gulf Is	2006	Pre	20060825	6	11:34:00	4	3	0.2	30.2433	88.8856	1.0-1.49	32	30.7		395	0	0	0	0	0	0	0	25	0	0	0	0	0	0	0	0	0	0	0	0	0	0	0	0	0	0	0	0	0	0	0	0
111	Ship Is	Gulf Is	2006	Pre	20060825	7	11:46:00	4	3	0.2	30.2419	88.8875	<1.0	32	30.9		100	0	0	0	0	0	0	0	0	0	0	0	0	0	0	0	0	0	0	0	0	0	0	0	0	0	0	0	0	0	0	0	0
114	B St John	Florida Bays	2006	Pre	20060901	1	10:02:00	4	3	0.2	30.2939	87.5181	<1.0	26	28.7		590	0	0	0	0	0	0	0	130	0	0	0	0	0	0	0	0	0	0	0	0	0	0	0	0	0	0	0	0	0	0	0	0
115	B St John	Florida Bays	2006	Pre	20060901	2	10:21:00	3.5	2	0.116667	30.2939	87.5181	<1.0	26	28.8		668.571	0	0	0	0	0	0	0	94.2857	0	0	0	0	0	0	0	0	8.57143	0	0	0	0	0	0	0	0	0	0	0	0	0	0	0
116	B St John	Florida Bays	2006	Pre	20060901	3	10:37:00	3.4	2	0.113333	30.31	87.5025	<1.0	26	29.1		1702.94	0	0	0	0	0	0	0	52.9412	0	0	0	0	0	0	0	0	0	0	0	0	0	0	0	0	0	0	0	0	0	0	0	0
117	B St John	Florida Bays	2006	Pre	20060901	4	10:55:00	4.5	2	0.15	30.31	87.5025	1.5-1.99	24	29.5		1413.33	0	0	0	0	0	0	0	140	0	0	0	0	0	0	0	0	0	0	0	0	0	0	0	0	0	0	0	0	0	0	0	0
118	B St John	Florida Bays	2006	Pre	20060901	5	11:11:00	3.7	3	0.185	30.31	87.5025	<1.0	25	29.6	No Grass	21.6216	0	0	0	0	0	0	16.2162	0	0	0	0	0	0	0	0	0	0	5.40541	0	0	0	0	0	0	0	0	0	0	0	0	0	0
119	B St John	Florida Bays	2006	Pre	20060901	6	11:27:00	4	2.5	0.166667	30.3139	87.4839	<1.0	27	30		1032	0	0	0	0	0	24	0	168	0	0	0	0	0	0	0	0	0	0	0	0	42	0	0	0	0	0	0	0	0	0	0	0
120	B St John	Florida Bays	2006	Pre	20060901	7	11:41:00	3.5	2	0.116667	30.3139	87.4839	<1.0	28	30.4		2220	0	0	0	0	0	0	0	548.571	8.57143	0	0	0	0	0	0	0	0	0	0	0	68.5714	0	17.1429	0	0	0	0	0	0	0	0	0
121	B St John	Florida Bays	2006	Pre	20060901	8	12:00:00	3.5	2	0.116667	30.3139	87.4839	1.0-1.49	28	30.5		917.143	0	0	0	0	0	51.4286	0	205.714	0	0	0	0	0	0	0	0	0	0	0	0	34.2857	0	0	0	0	0	0	0	0	0	0	0
122	B St John	Florida Bays	2006	Pre	20060901	9	12:16:00	3.5	2	0.116667	30.3139	87.4839	<1.0	29	30.4		2194.29	0	0	0	0	0	0	0	334.286	0	0	0	0	0	0	0	0	0	0	0	0	77.1429	0	0	0	0	0	0	0	0	0	0	0
123	B St John	Florida Bays	2006	Pre	20060901	10	12:56:00	3.2	2	0.106667	30.3017	87.4594	1.0-1.49	32	30.5		1678.12	0	0	0	0	0	9.375	0	131.25	0	0	0	0	0	0	0	0	0	0	0	0	65.625	0	0	0	0	0	0	0	0	0	0	0
124	B St John	Florida Bays	2006	Pre	20060901	11	13:10:00	3.2	2.5	0.133333	30.3017	87.4594	<1.0	30	30.6		2730	0	0	0	0	0	0	0	1020	0	0	0	0	0	0	0	0	0	0	0	0	75	0	0	0	0	0	0	0	0	0	0	0
125	B St John	Florida Bays	2006	Pre	20060901	12	13:47:00	3.5	2	0.116667	30.2606	87.3775	<1.0	22	31.6	No Grass	137.143	0	0	0	0	0	0	0	0	0	0	0	0	0	0	0	0	0	0	0	0	0	0	0	0	0	0	0	0	0	0	0	0
130	Big Lag	Florida Bays	2006	Pre	20060911	1	10:23:00	3	2	0.1	30.3094	87.4097	<1.0	35	28.3		1270	0	0	0	0	0	0	0	110	0	0	0	0	0	0	0	0	10	0	0	0	10	0	0	0	0	0	0	0	0	0	0	0
131	Big Lag	Florida Bays	2006	Pre	20060911	2	10:37:00	3.5	2	0.116667	30.3092	87.4106	<1.0	34	28.8		3497.14	0	0	0	0	0	0	0	480	0	0	0	0	0	0	0	0	8.57143	0	0	0	17.1429	0	0	0	0	0	0	0	0	0	0	0
132	Big Lag	Florida Bays	2006	Pre	20060911	3	10:58:00	3	2	0.1	30.3092	87.4075	1.0-1.49	34	29		2280	0	0	0	0	0	0	0	170	0	0	0	0	0	0	0	0	0	0	0	0	0	0	0	0	0	0	0	0	0	0	0	0
133	Big Lag	Florida Bays	2006	Pre	20060911	4	11:23:00	3.5	2	0.116667	30.3239	87.3706	>2.0	32	29		162.857	0	0	0	0	0	0	0	0	0	0	0	0	0	0	0	0	0	0	0	0	0	0	0	0	0	0	0	0	0	0	0	0
134	Big Lag	Florida Bays	2006	Pre	20060911	5	11:31:00	3.5	1	0.0583333	30.3239	87.3711	1.0-1.49	31	29		1765.71	0	0	0	0	0	0	0	120	0	0	0	0	0	0	0	0	0	0	0	0	0	0	0	0	0	0	0	0	0	0	0	0
135	Big Lag	Florida Bays	2006	Pre	20060911	6	11:39:00	3	1.5	0.075	30.3233	87.3728	1.0-1.49	31	29		1200	0	0	0	0	0	0	0	80	0	0	0	0	0	0	0	0	0	0	0	0	0	0	0	0	0	0	0	0	0	0	0	0
136	Big Lag	Florida Bays	2006	Pre	20060911	7	11:49:00	2.5	2	0.0833333	30.3239	87.3711	<1.0	31	29.3		1524	0	0	0	0	0	0	0	48	0	0	0	0	0	0	0	0	0	0	0	0	0	0	0	0	0	0	0	0	0	0	0	0
137	Big Lag	Florida Bays	2006	Pre	20060911	8	12:07:00	3	2	0.1	30.3125	87.3689	<1.0	32	29.4		3190	0	0	0	0	0	10	0	200	0	0	0	0	0	0	0	0	0	0	0	0	0	0	0	0	0	0	0	0	0	0	0	0
138	Big Lag	Florida Bays	2006	Pre	20060911	9	12:19:00	3.5	2	0.116667	30.3128	87.3717	<1.0	33	29.5		2665.71	0	0	0	0	0	8.57143	0	145.714	0	0	0	0	0	0	0	0	0	0	0	0	34.2857	0	0	0	0	0	0	0	0	0	0	0
139	Big Lag	Florida Bays	2006	Pre	20060911	10	12:37:00	3.5	2	0.116667	30.3133	87.3703	1.0-1.49	34	29.6		171.429	0	0	0	0	0	0	0	0	0	0	0	0	0	0	0	0	0	0	0	0	0	0	0	0	0	0	0	0	0	0	0	0
140	Big Lag	Florida Bays	2006	Pre	20060911	11	12:59:00	2.5	3	0.125	30.3222	87.3711	<1.0	32	30		1560	0	0	0	0	0	0	0	160	0	0	0	0	0	0	0	0	0	0	0	0	0	0	0	0	0	0	0	0	0	0	0	0
141	Big Lag	Florida Bays	2006	Pre	20060911	12	13:28:00	3.5	2.5	0.145833	30.3256	87.3267	1.0-1.49	35	30.2		1220.57	0	0	0	0	0	0	0	48	0	0	0	0	0	0	0	0	0	0	0	0	0	0	0	0	0	0	0	0	0	0	0	0
142	Big Lag	Florida Bays	2006	Pre	20060911	13	13:45:00	2.5	2.5	0.104167	30.325	87.3272	<1.0	34	30.7		1084.8	0	0	0	0	0	0	0	28.8	0	0	0	0	0	0	0	0	0	0	0	0	0	0	0	0	0	0	0	0	0	0	0	0
143	Big Lag	Florida Bays	2006	Pre	20060911	14	13:59:00	3	2	0.1	30.3244	87.3283	<1.0	34	31.1		2370	0	0	0	0	0	0	0	40	0	0	0	0	0	0	0	0	0	0	0	0	0	0	0	0	0	0	0	0	0	0	0	0
144	Big Lag	Florida Bays	2006	Pre	20060911	15	14:14:00	3.5	3	0.175	30.3236	87.3278	1.0-1.49	34	30.4		4137.14	0	0	0	0	0	0	0	120	0	0	0	0	0	0	0	0	5.71429	22.8571	0	0	0	0	0	0	0	0	0	0	0	0	0	0
145	PAP	Miss Sound	2006	Pre	20060912	1	08:54:00	3	2	0.1	30.3211	88.1817	<1.0	27	27.1		40	0	0	0	0	0	0	0	0	0	0	0	0	0	0	0	0	0	0	0	10	0	0	10	0	0	0	0	0	0	0	0	0
146	PAP	Miss Sound	2006	Pre	20060912	2	09:05:00	3.5	2	0.116667	30.3206	88.1836	<1.0	24	27.1		137.143	0	0	0	0	0	0	42.8571	17.1429	0	0	0	0	0	34.2857	0	0	0	0	0	8.57143	17.1429	0	8.57143	0	0	0	0	0	0	0	0	0
147	PAP	Miss Sound	2006	Pre	20060912	3	09:30:00	3.5	2	0.116667	30.3606	88.21	<1.0	29	27.3		8.57143	0	0	0	0	0	0	0	0	0	0	0	0	0	0	0	0	0	0	0	0	0	0	0	0	0	0	0	0	0	0	0	0
148	PAP	Miss Sound	2006	Pre	20060912	4	09:37:00	3.5	2	0.116667	30.3619	88.2133	<1.0	28	27.4		214.286	0	0	0	0	0	0	34.2857	0	0	0	0	0	0	0	0	0	0	25.7143	8.57143	0	0	0	0	0	0	0	0	0	0	0	0	0
149	PAP	Miss Sound	2006	Pre	20060912	5	09:58:00	3.5	2	0.116667	30.3769	88.3022	<1.0	29	27.4		51.4286	0	0	0	0	0	0	34.2857	0	0	0	0	0	0	0	0	0	0	0	0	0	0	0	0	0	0	0	0	0	0	0	0	0
150	PAP	Miss Sound	2006	Pre	20060912	6	10:07:00	3.5	2	0.116667	30.3814	88.3008	<1.0	28	27.3		111.429	0	0	0	0	0	8.57143	8.57143	77.1429	0	0	0	0	0	8.57143	0	0	0	0	0	0	0	0	0	0	0	0	0	0	0	0	0	0
151	PAP	Miss Sound	2006	Pre	20060912	7	10:27:00	3.5	2	0.116667	30.3747	88.3139	<1.0	31	27.6		85.7143	0	0	0	0	0	0	8.57143	8.57143	0	0	0	0	0	0	0	0	0	0	0	0	0	0	0	0	0	0	0	0	0	0	0	0
152	PAP	Miss Sound	2006	Pre	20060912	8	10:33:00	3.5	2	0.116667	30.3761	88.3136	<1.0	30	27.7		291.429	0	0	0	0	0	0	0	205.714	0	0	0	0	0	0	0	0	0	0	0	0	0	0	0	0	0	0	0	0	0	0	0	0
153	PAP	Miss Sound	2006	Pre	20060912	9	10:45:00	3	2	0.1	30.3778	88.3114	<1.0	31	27.9		760	0	0	0	0	0	0	0	190	10	0	0	0	0	0	0	0	40	0	0	0	60	0	0	0	0	0	0	0	0	0	0	0
154	PAP	Miss Sound	2006	Pre	20060912	10	11:05:00	3	2	0.1	30.3758	88.3122	<1.0	30	28.2		1530	0	0	0	0	0	0	0	310	10	0	0	0	0	0	0	0	20	0	0	0	50	0	0	0	0	0	0	0	0	0	0	0
155	Mid Bay	Miss Sound	2006	Pre	20060912	11	11:37:00	3	2	0.1	30.3664	88.3967	<1.0	31	28		110	0	0	0	0	0	0	0	30	0	0	0	0	0	0	0	0	0	0	0	0	0	0	10	0	0	0	0	0	0	0	0	0
156	Mid Bay	Miss Sound	2006	Pre	20060912	12	11:51:00	3	2	0.1	30.3828	88.3997	<1.0	30	28.5		170	0	0	0	0	0	0	0	10	0	0	0	0	0	10	0	0	0	0	0	0	10	0	0	0	0	0	0	0	0	0	0	0
157	Mid Bay	Miss Sound	2006	Pre	20060912	13	12:03:00	3	1	0.05	30.3839	88.4017	<1.0	31	28.8		380	0	0	0	0	0	0	0	180	0	0	0	0	0	20	0	0	0	0	0	0	0	0	0	0	0	0	0	0	0	0	0	0
158	Mid Bay	Miss Sound	2006	Pre	20060912	14	12:14:00	3	2	0.1	30.385	88.4072	<1.0	29	29		120	0	0	0	0	0	0	0	20	0	0	0	0	0	0	0	0	0	0	0	0	0	0	0	0	0	0	0	0	0	0	0	0
159	Mid Bay	Miss Sound	2006	Pre	20060912	15	12:25:00	3	2	0.1	30.3828	88.4086	<1.0	29	28.8		150	0	0	0	0	0	0	0	40	0	0	0	0	0	0	0	0	0	0	0	0	0	0	0	0	0	0	0	0	0	0	0	0
160	Mid Bay	Miss Sound	2006	Pre	20060912	16	12:37:00	4	2	0.133333	30.3764	88.4047	<1.0	30	28.8		150	0	0	0	0	0	0	0	7.5	0	0	0	0	0	0	0	0	0	0	0	0	7.5	0	0	0	0	0	0	0	0	0	0	0
161	GBS	Miss Sound	2006	Pre	20060912	17	13:04:00	3	3	0.15	30.3689	88.3664	<1.0	31	29.6		300	0	0	0	0	0	0	0	0	0	0	0	0	0	0	0	0	0	0	0	0	13.3333	0	0	0	0	0	0	0	0	0	0	0
162	GBS	Miss Sound	2006	Pre	20060912	18	13:13:00	3	3	0.15	30.3694	88.3636	<1.0	31	29.8		240	0	0	0	0	0	0	0	0	0	0	0	0	0	0	0	0	0	0	0	0	26.6667	0	6.66667	0	0	0	0	0	0	0	0	0
163	GBS	Miss Sound	2006	Pre	20060912	19	13:18:00	3	2	0.1	30.3694	88.3622	<1.0	31	29.7		550	0	0	0	0	0	0	0	10	0	0	0	0	0	0	0	0	0	0	0	0	60	0	30	0	0	0	0	0	0	0	0	0
179	B St John	Florida Bays	2006	Pre	20060914	12	13:28:00	2.5	1	0.0416667	30.2826	87.5293	<1.0	28	29.2	NEP79	816	0	0	0	0	0	0	0	48	0	0	0	0	0	0	0	0	0	0	0	0	0	0	0	0	0	0	0	0	0	0	0	0
180	B St John	Florida Bays	2006	Pre	20060914	13	13:41:00	1.5	1	0.025	30.2832	87.5266	<1.0	29	29	NEP79	1640	0	0	0	0	0	0	0	0	0	0	0	0	0	0	0	0	0	0	0	0	0	0	0	0	0	0	0	0	0	0	0	0
181	B St John	Florida Bays	2006	Pre	20060914	14	14:03:00	1.5	1.5	0.0375	30.283	87.5267	<1.0	28	28.9	NEP79	3040	0	0	0	0	0	0	0	80	0	0	0	0	0	0	0	0	0	53.3333	0	0	26.6667	0	0	0	0	0	0	0	0	0	0	0
182	B St John	Florida Bays	2006	Pre	20060914	15	14:28:00	2	1.5	0.05	30.2821	87.5231	<1.0	27	29.2	NEP78	1060	0	0	0	0	0	0	0	100	0	0	0	0	0	0	0	0	0	0	0	0	0	0	0	0	0	0	0	0	0	0	0	0
183	Pen	Florida Bays	2006	Pre	20060927	1	09:04:00	3	2	0.1	30.365	87.1889	<1.0	19	24.7	No Grass	10	0	0	0	0	0	0	0	0	0	0	0	0	0	0	0	0	0	0	0	0	0	0	0	0	0	0	0	0	0	0	0	0
184	Pen	Florida Bays	2006	Pre	20060927	2	09:10:00	4	2	0.133333	30.366	87.1886	1.0-1.49	18	24.8	No Grass	7.5	0	0	0	0	0	0	0	0	0	0	0	0	0	0	0	0	0	0	0	0	0	0	0	0	0	0	0	0	0	0	0	0
185	Pen	Florida Bays	2006	Pre	20060927	3	09:19:00	3.5	2	0.116667	30.3617	87.2024	<1.0	18	24.9	No Grass, add 1 pinfish	8.57143	0	0	0	0	0	0	0	0	0	0	0	0	0	0	0	0	0	0	0	0	0	0	0	0	0	0	0	0	0	0	0	0
186	Pen	Florida Bays	2006	Pre	20060927	4	09:24:00	3.5	2	0.116667	30.3615	87.2043	<1.0	18	24.7	No Grass	34.2857	0	0	0	0	0	0	0	0	0	0	0	0	0	0	0	0	0	0	0	0	0	0	0	0	0	0	0	0	0	0	0	0
187	Pen	Florida Bays	2006	Pre	20060927	5	09:33:00	3	2	0.1	30.3603	87.2041	<1.0	21	24.7	No Grass	560	0	0	0	0	0	0	0	0	0	0	0	0	0	0	0	0	0	0	0	0	0	0	0	0	0	0	0	0	0	0	0	0
188	Pen	Florida Bays	2006	Pre	20060927	6	09:45:00	3.5	2	0.116667	30.3599	87.204	1.0-1.49	22	25.2		840	0	0	0	0	0	0	0	60	0	0	0	0	0	0	0	0	0	0	0	0	0	0	0	0	0	0	0	0	0	0	0	0
189	Pen	Florida Bays	2006	Pre	20060927	7	10:01:00	3.5	2	0.116667	30.3596	87.2031	<1.0	20	25.5		300	0	0	0	0	0	0	0	0	0	0	0	0	0	0	0	0	0	0	0	0	0	0	0	0	0	0	0	0	0	0	0	0
190	Pen	Florida Bays	2006	Pre	20060927	8	10:14:00	3.5	2	0.116667	30.359	87.2028	1.0-1.49	20	25.6		917.143	0	0	0	0	0	0	0	60	0	0	0	0	0	0	0	0	17.1429	0	0	0	0	0	0	0	0	0	0	0	0	0	0	0
191	Pen	Florida Bays	2006	Pre	20060927	9	10:35:00	3	2	0.1	30.3535	87.1957	1.0-1.49	21	26		1710	0	0	0	0	0	0	0	100	10	0	0	0	0	0	0	0	0	0	0	0	0	0	0	0	0	0	0	0	0	0	0	0
192	Pen	Florida Bays	2006	Pre	20060927	10	10:59:00	3.5	2	0.116667	30.3528	87.1946	1.5-1.99	22	26.4		1542.86	0	0	0	0	0	0	0	94.2857	8.57143	0	0	0	0	0	0	0	8.57143	0	0	0	8.57143	0	0	0	0	0	0	0	0	0	0	0
193	SRS	Florida Bays	2006	Pre	20060927	11	11:50:00	3.5	2	0.116667	30.3567	87.1507	<1.0	22	26.2		1508.57	0	0	0	0	0	0	0	94.2857	0	0	0	0	0	0	0	0	8.57143	0	0	0	0	0	0	0	0	0	0	0	0	0	0	0
194	SRS	Florida Bays	2006	Pre	20060927	12	12:05:00	3.5	2	0.116667	30.3567	87.1504	<1.0	21	26.2		1414.29	0	0	0	0	0	17.1429	0	17.1429	8.57143	0	0	0	0	0	0	0	0	0	0	0	0	0	0	0	0	0	0	0	0	0	0	0
195	SRS	Florida Bays	2006	Pre	20060927	13	12:18:00	3	2	0.1	30.3571	87.1491	<1.0	22	26.3		3540	0	0	0	0	0	0	0	470	10	0	0	0	0	0	0	0	20	0	0	0	0	0	0	0	0	0	0	0	0	0	0	0
196	SRS	Florida Bays	2006	Pre	20060927	14	12:37:00	2.5	2	0.0833333	30.3578	87.1479	<1.0	22	26.3		792	0	0	0	0	0	0	0	132	0	0	0	0	0	0	0	0	48	0	0	0	0	0	0	0	0	0	0	0	0	0	0	0
197	SRS	Florida Bays	2006	Pre	20060927	15	12:46:00	3.5	2	0.116667	30.358	87.1467	<1.0	21	26.4		1731.43	0	0	0	0	0	0	0	162.857	8.57143	0	0	0	0	0	0	0	8.57143	0	0	0	8.57143	0	0	0	0	0	0	0	0	0	0	0
198	SRS	Florida Bays	2006	Pre	20060927	16	13:16:00	2.5	2	0.0833333	30.3792	87.0469	<1.0	20	26.6		696	0	0	0	0	0	0	0	12	0	0	0	0	0	0	0	0	0	0	0	0	12	0	0	0	0	0	0	0	0	0	0	0
199	SRS	Florida Bays	2006	Pre	20060927	17	13:49:00	3	2	0.1	30.3788	87.0473	<1.0	21	26.5		1570	0	0	0	0	0	0	0	90	40	0	0	0	0	0	0	0	0	0	0	0	10	0	0	0	0	0	0	0	0	0	0	0
200	SRS	Florida Bays	2006	Pre	20060927	18	14:04:00	3	2	0.1	30.3794	87.0447	<1.0	20	26.7		1300	0	0	0	0	0	0	0	80	40	0	0	0	0	0	0	0	0	0	0	0	0	0	0	0	0	0	0	0	0	0	0	0
201	SRS	Florida Bays	2006	Pre	20060927	19	14:13:00	3	2	0.1	30.3797	87.043	<1.0	23	26.8		2090	0	0	0	0	0	0	0	150	10	0	0	0	0	0	0	0	0	0	0	0	0	0	0	0	0	0	0	0	0	0	0	0
202	SRS	Florida Bays	2006	Pre	20060927	20	14:25:00	3	2	0.1	30.3806	87.041	<1.0	26	26.8		2070	0	0	0	0	0	0	0	340	80	0	0	0	0	0	0	0	0	0	0	0	50	0	0	0	0	0	0	0	0	0	0	0
203	SRS	Florida Bays	2006	Pre	20060927	21	15:06:00	2.5	2	0.0833333	30.3576	87.0202	<1.0	23	26.6		936	0	0	0	0	0	0	0	168	24	0	0	0	0	0	0	0	12	0	0	0	132	0	0	0	0	0	0	0	0	0	0	0
204	SRS	Florida Bays	2006	Pre	20060927	22	15:25:00	3.5	3	0.175	30.3582	87.0184	>2.0	25	27.5		851.429	0	0	0	0	0	5.71429	0	45.7143	0	0	0	0	0	0	0	0	5.71429	0	0	0	28.5714	0	0	0	0	0	0	0	0	0	0	0
205	SRS	Florida Bays	2006	Pre	20060927	23	15:43:00	2.5	3	0.125	30.3601	87.0148	<1.0	25	26.7		600	0	0	0	0	0	0	0	0	0	0	0	0	0	0	0	0	0	0	0	0	16	0	0	0	0	0	0	0	0	0	0	0
206	SRS	Florida Bays	2006	Pre	20060927	24	15:57:00	2.5	2	0.0833333	30.3601	87.0137	<1.0	25	26.6		396	0	0	0	0	0	0	0	0	0	0	0	0	0	0	0	0	0	0	0	0	12	0	0	0	0	0	0	0	0	0	0	0
207	SRS	Florida Bays	2006	Pre	20060927	25	16:08:00	3	2	0.1	30.36	87.0108	<1.0	25	26.7		430	0	0	0	0	0	0	0	40	0	0	0	0	0	0	0	0	0	0	0	0	20	0	0	0	0	0	0	0	0	0	0	0
208	SRS	Florida Bays	2006	Pre	20060927	26	16:51:00	3.5	2	0.116667	30.3271	87.1869	1.0-1.49	25	26.6	No Grass	42.8571	0	0	0	0	0	0	0	0	0	0	0	0	0	0	0	0	0	0	0	0	0	0	0	0	0	0	0	0	0	0	0	0
209	Choc	Florida Bays	2006	Pre	20060928	1	09:25:00	3.5	2	0.116667	30.328	86.4836	1.0-1.49	25	25.2		900	0	0	0	0	0	0	0	0	0	0	0	0	0	0	0	0	0	0	0	0	0	0	0	0	0	0	0	0	0	0	0	0
210	Choc	Florida Bays	2006	Pre	20060928	2	09:40:00	3.5	2	0.116667	30.3989	86.5334	1.0-1.49	25	25.3		1028.57	0	0	0	0	0	0	0	0	0	0	0	0	0	0	0	0	0	0	0	0	0	0	0	0	0	0	0	0	0	0	0	0
211	Choc	Florida Bays	2006	Pre	20060928	3	09:57:00	3.5	2	0.116667	30.3986	86.5342	<1.0	25	25.4		925.714	0	0	0	0	0	0	0	0	0	0	0	0	0	0	0	0	0	0	0	0	0	0	0	0	0	0	0	0	0	0	0	0
213	Choc	Florida Bays	2006	Pre	20060928	5	10:21:00	3.5	2	0.116667	30.4007	86.538	1.0-1.49	25	25.4		1920	0	0	0	0	0	0	0	0	0	0	0	0	0	0	0	0	0	0	0	0	25.7143	0	0	0	0	0	0	0	0	0	0	0
214	Choc	Florida Bays	2006	Pre	20060928	6	10:47:00	3	2	0.1	30.3964	86.5549	>2.0	23	24.9		620	0	0	0	0	0	0	10	10	0	0	0	0	0	0	0	0	10	0	0	0	10	0	0	0	0	0	0	0	0	0	0	0
215	Choc	Florida Bays	2006	Pre	20060928	7	11:05:00	1.5	2	0.05	30.3974	86.556	<1.0	24	24.6		1060	0	0	0	0	0	0	0	20	0	0	0	0	0	0	0	0	20	0	0	0	0	0	20	0	0	0	0	0	0	0	0	0
216	Choc	Florida Bays	2006	Pre	20060928	8	11:18:00	3	2	0.1	30.3973	86.5564	<1.0	23	25		1050	0	0	0	0	0	0	0	30	0	0	0	0	0	0	0	0	30	0	0	0	10	0	0	0	0	0	0	0	0	0	0	0
217	Choc	Florida Bays	2006	Pre	20060928	9	11:38:00	2.5	2	0.0833333	30.3953	86.562	1.0-1.49	24	25.6		840	0	0	0	0	0	0	0	36	0	0	0	0	0	0	0	0	0	0	0	0	0	0	0	0	0	0	0	0	0	0	0	0
218	Choc	Florida Bays	2006	Pre	20060928	10	11:54:00	3.5	2	0.116667	30.4033	86.5381	1.0-1.49	24	25.6		617.143	0	0	0	0	0	0	0	0	0	0	0	0	0	0	0	0	8.57143	0	0	0	0	0	0	0	0	0	0	0	0	0	0	0
219	SAS	Florida Bays	2006	Pre	20060928	11	14:36:00	2.5	2	0.0833333	30.1879	85.7312	<1.0	22	28.1		780	0	0	0	0	0	0	0	0	36	0	0	0	0	0	0	0	0	0	0	0	48	0	0	0	0	0	0	0	0	0	0	0
220	SAS	Florida Bays	2006	Pre	20060928	12	14:50:00	3	2	0.1	30.1883	85.7316	<1.0	24	26.9		700	0	0	0	0	0	0	0	120	0	0	0	0	0	0	0	0	20	0	0	0	20	0	0	0	0	0	0	0	0	0	0	0
221	SAS	Florida Bays	2006	Pre	20060928	13	15:02:00	3	2	0.1	30.1876	85.733	<1.0	25	26.3		1070	0	0	0	0	0	0	0	40	10	0	0	0	0	0	0	0	20	0	0	0	40	0	0	0	0	0	0	0	0	0	10	0
222	SAS	Florida Bays	2006	Pre	20060928	14	15:16:00	3.5	2	0.116667	30.1877	85.732	<1.0	25	26.4		1208.57	0	0	0	0	0	0	0	8.57143	0	0	0	0	0	0	0	0	17.1429	0	0	0	25.7143	0	0	0	0	0	0	0	0	0	0	0
223	SAS	Florida Bays	2006	Pre	20060928	15	15:31:00	2.5	2	0.0833333	30.1884	85.729	<1.0	22	26.5		1056	0	0	0	0	0	0	0	36	0	0	0	0	0	0	0	0	24	0	0	0	0	0	0	0	0	0	0	0	0	0	0	0
224	SAS	Florida Bays	2006	Pre	20060928	16	16:12:00	3.5	2	0.116667	30.1063	85.6974	1.5-1.99	28	26.7		2005.71	0	0	0	0	0	0	0	0	0	0	0	0	0	0	0	0	25.7143	0	0	0	0	0	0	0	0	8.57143	0	0	0	0	0	0
225	SAS	Florida Bays	2006	Pre	20060928	17	16:40:00	3	2	0.1	30.1003	85.6912	<1.0	30	26.8		720	0	0	0	0	0	0	0	20	0	0	0	0	0	0	0	0	20	0	0	0	0	0	0	0	0	0	0	0	0	0	0	0
226	SAS	Florida Bays	2006	Pre	20060928	18	16:49:00	3	2	0.1	30.0988	85.6897	<1.0	28	26.7		2140	0	0	0	0	0	0	0	0	0	0	0	0	0	0	0	0	70	0	0	0	0	0	0	0	0	0	0	0	0	0	0	0
227	SAS	Florida Bays	2006	Pre	20060928	19	17:10:00	2.5	2	0.0833333	30.1288	85.6838	<1.0	28	26.9		2520	0	0	0	0	0	0	0	12	0	0	0	0	0	0	0	0	12	0	0	0	0	0	0	0	0	0	0	0	0	0	0	0
228	SAS	Florida Bays	2006	Pre	20060928	20	17:26:00	2.5	2	0.0833333	30.1311	85.8815	1.0-1.49	28	27.3		2100	0	0	0	0	0	0	0	24	0	0	0	0	12	0	0	12	24	0	0	0	0	0	0	0	0	0	0	0	0	12	0	0
229	PSJ	Florida Bays	2006	Pre	20060929	1	08:41:00	3	2	0.1	29.7855	85.3064	<1.0	30	24		810	0	0	0	0	0	0	0	0	0	0	0	0	0	0	0	0	0	0	0	0	0	0	0	0	0	0	0	0	0	0	0	0
230	PSJ	Florida Bays	2006	Pre	20060929	2	08:53:00	3.5	2	0.116667	29.7839	85.3066	<1.0	29	24.6		1354.29	0	0	0	0	0	25.7143	0	25.7143	0	0	0	0	0	0	0	0	8.57143	0	0	0	0	0	0	0	0	0	0	0	0	0	0	0
231	PSJ	Florida Bays	2006	Pre	20060929	3	09:11:00	3	2	0.1	29.78	85.3069	<1.0	30	24.3		960	0	0	0	0	0	0	0	50	0	0	0	0	0	0	0	0	20	0	0	0	0	0	0	0	0	0	0	0	0	0	10	0
232	PSJ	Florida Bays	2006	Pre	20060929	4	09:24:00	3	2	0.1	29.7778	85.3077	<1.0	30	23.9		1830	0	0	0	0	0	0	0	0	0	0	0	0	0	0	0	0	10	0	0	0	0	0	0	0	0	0	0	0	0	0	0	0
233	PSJ	Florida Bays	2006	Pre	20060929	5	09:35:00	4	2	0.133333	29.7756	85.3097	<1.0	29	24		247.5	0	0	0	0	0	0	0	0	0	0	0	0	0	0	0	0	0	0	0	0	0	0	0	0	0	0	0	0	0	0	0	0
234	PSJ	Florida Bays	2006	Pre	20060929	6	10:08:00	3	2	0.1	29.7334	85.3278	<1.0	31	23.8		1050	0	0	0	0	0	0	0	10	0	0	0	0	0	0	0	0	100	0	0	0	0	0	0	0	0	0	0	0	0	0	0	0
235	PSJ	Florida Bays	2006	Pre	20060929	7	10:22:00	2.5	2	0.0833333	29.7331	85.327	<1.0	30	23.5		840	0	0	0	0	0	0	0	12	0	0	0	0	0	0	0	0	60	0	0	0	0	0	0	0	0	0	0	0	0	12	0	0
236	PSJ	Florida Bays	2006	Pre	20060929	8	10:42:00	4	2	0.133333	29.7316	85.3314	1.0-1.49	28	23.7		795	0	0	0	0	0	0	0	7.5	0	0	0	0	0	0	0	0	75	0	0	0	0	0	0	0	0	0	0	0	0	0	0	0
237	PSJ	Florida Bays	2006	Pre	20060929	9	11:12:00	3	2	0.1	29.7449	85.3858	<1.0	30	25.1		840	0	0	0	0	0	0	0	0	0	0	0	0	0	0	0	0	30	0	0	0	0	0	0	0	0	0	0	0	0	0	0	0
238	PSJ	Florida Bays	2006	Pre	20060929	10	11:23:00	1.5	2	0.05	29.7445	85.3863	<1.0	30	25.3		20	0	0	0	0	0	0	0	0	0	0	0	0	0	0	0	0	0	0	0	0	0	0	0	0	0	0	0	0	0	0	0	0
239	PSJ	Florida Bays	2006	Pre	20060929	11	12:24:00	3	2	0.1	29.8062	85.4071	1.0-1.49	30	26.6		360	0	0	0	0	0	0	0	0	0	0	0	0	0	0	0	20	20	0	0	0	0	0	0	0	0	0	0	0	0	0	0	0
240	PSJ	Florida Bays	2006	Pre	20060929	12	12:33:00	3	3	0.15	29.8074	85.4071	1.0-1.49	30	26.6		1780	0	0	0	0	0	0	0	0	0	0	0	0	0	0	0	6.66667	33.3333	0	0	0	0	0	0	0	0	0	0	0	0	0	0	0
241	PSJ	Florida Bays	2006	Pre	20060929	13	13:05:00	3.5	2	0.116667	29.7954	85.3055	<1.0	30	26.9		1028.57	0	0	0	0	0	8.57143	0	17.1429	0	0	0	0	0	0	0	0	25.7143	0	0	0	0	0	0	0	0	0	0	0	0	0	0	0
242	PSJ	Florida Bays	2006	Pre	20060929	14	13:20:00	3	2	0.1	29.7947	85.3056	1.0-1.49	30	26.9		880	0	0	0	0	0	0	0	0	0	0	0	0	0	0	0	0	20	0	0	0	0	0	0	0	0	0	0	0	0	0	0	0
243	PSJ	Florida Bays	2006	Pre	20060929	15	13:29:00	3	2	0.1	29.7935	85.3052	<1.0	29	27		1390	0	0	0	0	0	10	0	20	0	0	0	0	0	0	0	0	20	0	0	0	10	0	0	0	0	0	0	0	0	0	0	0
244	PSJ	Florida Bays	2006	Pre	20060929	16	13:45:00	4	2	0.133333	29.7932	85.3054	<1.0	28	27.1		772.5	0	0	0	0	0	0	0	7.5	0	0	0	0	0	0	0	0	15	0	0	0	0	0	0	0	0	0	0	0	0	0	0	0
245	Chand Is	Chand Is	2006	Pre	20061002	1	09:40:00	2	2	0.0666667	30.0092	88.8503	<1.0	25	27		2160	0	0	0	0	0	0	0	405	0	0	0	15	0	0	0	0	15	0	0	0	0	0	0	0	0	0	0	0	0	0	0	0
246	Chand Is	Chand Is	2006	Pre	20061002	2	09:56:00	2.2	2	0.0733333	30.0092	88.8533	1.5-1.99	25	27		2031.82	0	0	0	0	0	0	0	722.727	0	0	0	0	0	0	0	0	54.5455	0	0	0	0	0	0	0	0	0	0	0	0	0	0	0
247	Chand Is	Chand Is	2006	Pre	20061002	3	10:11:00	2	2	0.0666667	30.0028	88.8519	<1.0	25.5	27		3240	0	0	0	0	0	0	0	525	15	0	0	0	0	0	0	0	30	0	0	0	0	0	0	0	0	0	0	0	0	0	0	0
248	Chand Is	Chand Is	2006	Pre	20061002	4	10:28:00	2.4	2	0.08	30.0106	88.8533	<1.0	25.5	27		1200	0	0	0	0	0	12.5	0	450	25	0	0	0	0	0	0	0	25	0	0	0	0	0	0	0	0	0	0	0	0	0	0	0
249	Chand Is	Chand Is	2006	Pre	20061002	5	10:40:00	2	2	0.0666667	30.0106	88.8506	<1.0	25.5	27		1095	0	0	0	0	0	0	0	360	0	0	0	0	0	0	0	0	0	0	0	0	0	0	0	0	0	0	0	0	0	0	0	0
250	Chand Is	Chand Is	2006	Pre	20061002	6	11:06:00	2	2	0.0666667	29.9256	88.8475	<1.0	25	27		3600	0	0	0	0	0	15	0	810	0	0	0	0	0	0	0	0	0	0	0	0	0	0	0	0	0	0	0	0	0	0	0	0
251	Chand Is	Chand Is	2006	Pre	20061002	7	11:20:00	2.2	2	0.0733333	29.9425	88.8422	1.0-1.49	25.5	27		5427.27	0	0	0	0	0	0	0	463.636	0	0	0	68.1818	0	0	0	13.6364	27.2727	0	0	0	0	0	0	0	0	13.6364	0	0	0	0	0	0
252	Chand Is	Chand Is	2006	Pre	20061002	8	11:40:00	2.2	2	0.0733333	29.9197	88.8361	1.0-1.49	30	27		3818.18	0	0	0	0	0	13.6364	0	763.636	0	0	0	0	0	0	0	0	27.2727	0	0	0	0	0	0	0	0	0	0	0	0	0	0	0
253	Chand Is	Chand Is	2006	Pre	20061002	9	12:07:00	2	2	0.0666667	29.9208	88.8486	<1.0	31	27		2865	0	0	0	0	0	0	0	210	15	0	0	15	0	0	0	0	45	0	0	0	0	0	0	0	0	0	0	0	0	0	0	0
254	Chand Is	Chand Is	2006	Pre	20061002	10	12:28:00	2.4	2	0.08	29.9331	88.8356	<1.0	28	27		3512.5	0	0	0	0	0	25	0	662.5	0	0	0	12.5	0	0	0	0	0	0	0	0	25	0	0	0	0	12.5	0	0	0	0	0	0
266	B St John	Florida Bays	2006	Pre	20061024	1	11:24:00	3.8	2	0.126667	30.35	87.4953	<1.0	28	19.5		797.368	0	0	0	0	0	7.89474	0	94.7368	0	0	0	0	0	0	0	0	0	0	0	0	71.0526	0	0	0	0	0	0	0	0	0	0	0
267	B St John	Florida Bays	2006	Pre	20061024	2	11:40:00	3	2	0.1	30.35	87.4953	1.0-1.49	26	19.7		730	0	0	0	0	0	0	0	10	0	0	0	0	0	0	0	0	0	0	0	0	0	0	0	0	0	0	0	0	0	0	0	0
268	B St John	Florida Bays	2006	Pre	20061024	3	11:51:00	3.5	2	0.116667	30.356	87.5527	<1.0	26	19.9		942.857	0	0	0	0	0	34.2857	0	60	8.57143	0	0	0	0	0	0	0	17.1429	0	0	0	111.429	0	0	0	0	0	0	0	0	0	0	0
269	B St John	Florida Bays	2006	Pre	20061024	4	12:09:00	2.5	2	0.0833333	30.363	87.5287	<1.0	26	20		1392	0	0	0	0	0	24	0	396	0	0	0	0	0	0	0	0	12	0	0	0	84	0	0	0	0	0	0	0	0	0	0	0
270	Big Lag	Florida Bays	2006	Pre	20061024	5	13:05:00	3.5	3	0.175	30.3677	87.3827	<1.0	32	20.5		3211.43	0	0	0	0	0	0	0	194.286	0	0	0	0	0	0	0	0	0	0	0	0	0	0	0	0	0	0	0	0	0	0	0	0
271	Big Lag	Florida Bays	2006	Pre	20061024	6	13:52:00	3	1	0.05	30.3707	87.3787	<1.0	33	20.8		2600	0	0	0	0	0	0	0	0	0	0	0	0	0	0	0	0	0	0	0	0	0	0	0	0	0	0	0	0	0	0	0	0
272	GBS	Miss Sound	2006	Pre	20061025	1	09:41:00	2.5	2	0.0833333	30.3857	88.433	<1.0	30	18		84	0	0	0	0	0	0	0	0	0	0	0	0	0	0	0	0	0	0	12	0	12	0	24	0	0	0	0	0	0	0	0	0
273	GBS	Miss Sound	2006	Pre	20061025	2	09:53:00	2.5	2	0.0833333	30.3867	88.443	<1.0	30	17.8		132	0	0	0	0	0	0	0	0	0	0	0	0	0	0	0	0	0	0	0	0	48	0	0	0	0	0	0	0	0	0	0	0
274	GBS	Miss Sound	2006	Pre	20061025	3	10:06:00	2.5	2	0.0833333	30.3827	88.3707	<1.0	30	17.7		156	0	0	0	0	0	0	0	24	0	0	0	0	0	0	0	0	12	0	0	0	48	0	0	0	0	0	0	0	0	0	0	0
275	GBS	Miss Sound	2006	Pre	20061025	4	10:15:00	2.5	2	0.0833333	30.3777	88.3827	<1.0	30	17.4		24	0	0	0	0	0	0	0	12	0	0	0	0	0	0	0	0	0	0	0	0	0	0	0	0	0	0	0	0	0	0	0	0
276	GBS	Miss Sound	2006	Pre	20061025	5	10:25:00	2.5	2	0.0833333	30.3757	88.3867	<1.0	30	17.3		120	0	0	0	0	0	12	0	0	0	0	0	0	0	0	0	0	0	0	0	0	12	0	24	0	0	0	0	0	0	0	0	0
277	GBS	Miss Sound	2006	Pre	20061025	6	10:34:00	2.5	3	0.125	30.4657	88.3927	<1.0	30	17.1		48	0	0	0	0	0	0	0	0	0	0	0	0	0	0	0	0	0	0	8	0	16	0	0	0	0	0	0	0	0	0	0	0
278	GBS	Miss Sound	2006	Pre	20061025	7	10:49:00	2.5	2	0.0833333	30.3667	88.3877	<1.0	30	17		24	0	0	0	0	0	0	0	0	0	0	0	0	0	0	0	0	0	0	0	0	12	0	0	0	0	0	0	0	0	0	0	0
279	PAP	Miss Sound	2006	Pre	20061025	8	11:16:00	2.3	2	0.0766667	30.4317	88.375	<1.0	28	17.9		286.957	0	0	0	0	0	0	0	0	13.0435	0	0	0	0	0	0	0	0	0	0	0	0	0	0	0	0	0	0	0	0	0	0	0
280	PAP	Miss Sound	2006	Pre	20061025	9	11:28:00	2.5	2	0.0833333	30.4347	88.381	<1.0	29	18.1		180	0	0	0	0	0	0	0	36	0	0	0	0	0	0	0	0	0	0	0	0	24	0	0	0	0	0	0	0	0	0	0	0
281	PAP	Miss Sound	2006	Pre	20061025	10	11:40:00	3	3	0.15	30.4327	88.375	<1.0	29	18.1		126.667	0	0	0	0	0	0	0	26.6667	0	0	0	0	0	0	0	0	0	0	0	0	6.66667	0	0	0	0	0	0	0	0	0	0	0
282	PAP	Miss Sound	2006	Pre	20061025	11	11:54:00	3.5	3	0.175	30.4197	88.379	<1.0	29	18.3		114.286	0	0	0	0	0	5.71429	0	5.71429	0	0	0	0	0	0	0	0	0	0	0	0	0	0	0	0	0	0	0	0	0	0	0	0
283	PAP	Miss Sound	2006	Pre	20061025	12	12:05:00	2.5	3	0.125	30.4137	88.391	<1.0	29	18.2		240	0	0	0	0	0	0	0	8	0	0	0	0	0	0	0	0	0	0	0	0	8	0	0	0	0	0	0	0	0	0	0	0
429	Big Lag	Florida Bays	2007	Pre	20070718	1	10:13:00	4.5	2	0.15	30.3101	87.3769	<1.0	30	31		1573.33	0	0	0	0	0	0	0	80	0	0	0	0	0	0	0	0	0	0	0	0	53.3333	0	0	0	0	0	0	0	0	0	0	0
430	Big Lag	Florida Bays	2007	Pre	20070718	2	10:33:00	3.5	2	0.116667	30.3101	87.37	<1.0	30	31		3985.71	0	0	0	0	0	0	0	222.857	8.57143	0	0	0	0	0	0	0	0	0	0	0	25.7143	0	0	0	0	0	0	0	0	0	0	0
431	Big Lag	Florida Bays	2007	Pre	20070718	3	11:13:00	3.5	2	0.116667	30.3099	87.3809	1.0-1.49	30	31		2537.14	0	0	0	0	0	0	0	68.5714	0	0	0	0	0	0	0	0	0	0	0	0	25.7143	0	0	0	0	0	0	0	0	0	0	0
444	Chand Is	Chand Is	2007	Pre	20070726	1	09:40:00	4.5	3	0.225	29.7927	88.8665	1.5-1.99	31	30.3889		1537.78	0	0	0	0	0	75.5556	0	102.222	4.44444	0	0	0	0	0	0	0	4.44444	0	0	0	0	0	0	0	0	4.44444	0	0	0	0	0	0
445	Chand Is	Chand Is	2007	Pre	20070726	2	10:14:00	4.7	3	0.235	29.8	88.8658	1.0-1.49	31	30.6111		710.638	0	0	0	0	0	0	0	0	0	0	0	0	0	0	0	0	0	0	0	0	0	0	0	4.25532	0	0	0	0	0	0	0	0
446	Chand Is	Chand Is	2007	Pre	20070726	3	10:27:00	4.8	2	0.16	29.8012	88.8679	1.0-1.49	31	30.7222		2612.5	0	0	0	0	0	12.5	0	2212.5	6.25	0	0	0	0	0	0	0	0	0	0	0	0	0	0	0	0	0	0	0	0	0	0	0
447	Chand Is	Chand Is	2007	Pre	20070726	4	10:54:00	5.6	2	0.186667	29.808	88.8579	1.5-1.99	31	30.7222		1526.79	0	0	0	0	0	16.0714	0	369.643	0	0	0	0	0	0	0	0	10.7143	5.35714	0	0	0	0	0	0	0	0	0	0	0	0	0	0
448	Chand Is	Chand Is	2007	Pre	20070726	5	11:23:00	5.3	2	0.176667	29.8428	88.8659	>2.0	31	30.7778	Heavy Drift Algae	28.3019	0	0	0	0	0	0	0	0	0	0	0	0	0	0	0	0	0	0	0	0	0	0	0	0	0	0	0	0	0	0	0	0
449	Chand Is	Chand Is	2007	Pre	20070726	6	11:38:00	4	2	0.133333	29.8447	88.8651	1.0-1.49	31	30.7778	Heavy Drift Algae, add 1 pinfish	7.5	0	0	0	0	0	0	0	0	0	0	0	0	0	0	0	0	0	0	0	0	0	0	0	0	0	0	0	0	0	0	0	0
450	Chand Is	Chand Is	2007	Pre	20070726	7	12:02:00	3.5	2	0.116667	29.8448	88.8595	1.0-1.49	33	31.1111		205.714	0	0	0	0	0	0	0	0	8.57143	0	0	0	0	0	0	0	0	0	0	0	0	0	0	0	0	0	0	0	0	0	0	0
451	Chand Is	Chand Is	2007	Pre	20070726	8	12:13:00	4.9	1	0.0816667	29.8457	88.8586	1.5-1.99	33	31		1334.69	0	0	0	0	0	24.4898	0	171.429	24.4898	0	0	0	0	0	0	0	0	0	0	0	0	0	0	0	0	0	0	0	0	0	0	0
452	Chand Is	Chand Is	2007	Pre	20070726	9	12:33:00	5.1	2	0.17	29.93	88.8408	<1.0	33	30.8889		370.588	0	0	0	0	0	0	0	11.7647	0	0	0	0	0	0	0	0	5.88235	0	0	0	0	0	0	0	0	0	0	0	0	0	0	0
453	Chand Is	Chand Is	2007	Pre	20070726	10	12:38:00	4.4	3	0.22	29.9312	88.8403	1.0-1.49	33	31		3009.09	0	0	0	0	0	27.2727	0	268.182	0	0	0	0	0	13.6364	0	0	18.1818	0	0	0	0	0	0	0	0	4.54545	0	0	0	0	0	0
454	Chand Is	Chand Is	2007	Pre	20070726	11	12:57:00	4.6	2	0.153333	29.9343	88.8378	<1.0	33	31.1111		5197.83	0	0	0	0	0	78.2609	0	665.217	0	0	0	0	0	0	0	0	13.0435	0	0	0	6.52174	0	0	0	0	13.0435	0	0	0	0	0	0
455	Chand Is	Chand Is	2007	Pre	20070726	12	13:33:00	4.9	2	0.163333	29.9865	88.8533	<1.0	33	31.1111		128.571	0	0	0	0	0	0	0	12.2449	0	0	0	0	0	0	0	0	0	0	0	0	0	0	0	0	0	0	0	0	0	0	0	0
456	Chand Is	Chand Is	2007	Pre	20070726	13	13:49:00	6.1	2	0.203333	29.9919	88.8334	1.0-1.49	33	31.1111	No Grass	1116.39	0	0	0	0	0	4.91803	0	0	0	0	0	0	0	0	0	0	0	0	0	0	0	0	0	0	0	0	0	0	0	0	0	0
457	Mid Bay	Miss Sound	2007	Pre	20070813	1	09:19:00	3.5	2	0.116667	30.3522	88.4091	<1.0	31	30.6		2125.71	0	0	0	0	0	8.57143	0	497.143	8.57143	0	0	0	0	0	0	0	0	0	0	0	111.429	0	0	0	0	0	0	0	0	0	0	0
458	Mid Bay	Miss Sound	2007	Pre	20070813	2	09:47:00	3.4	2	0.113333	30.3539	88.4103	<1.0	31	30.8		2311.76	0	0	0	0	0	26.4706	0	617.647	0	0	0	0	0	0	0	0	0	0	0	0	88.2353	0	8.82353	0	0	0	0	0	0	0	0	0
459	Mid Bay	Miss Sound	2007	Pre	20070813	3	10:02:00	3.5	2	0.116667	30.3553	88.4111	<1.0	31	30.9		240	0	0	0	0	0	0	0	68.5714	0	0	0	0	0	0	0	0	0	0	0	0	68.5714	0	0	0	0	0	0	0	0	0	0	0
460	Mid Bay	Miss Sound	2007	Pre	20070813	4	10:13:00	3.9	2	0.13	30.3568	88.4118	<1.0	31	30.9		638.462	0	0	0	0	0	0	0	253.846	0	0	0	0	0	0	0	0	0	0	0	0	15.3846	0	7.69231	0	0	0	0	0	0	0	0	0
461	GBS	Miss Sound	2007	Pre	20070813	5	10:45:00	5	2	0.166667	30.3644	88.3699	1.0-1.49	34	31.6	No Grass	348	0	0	0	0	0	0	6	126	0	0	0	0	0	0	0	0	0	0	6	0	0	0	0	0	0	0	0	0	0	0	0	0
462	GBS	Miss Sound	2007	Pre	20070813	6	10:54:00	3.4	2	0.113333	30.3667	88.3718	1.0-1.49	34	31.7	No Grass	185.294	0	0	0	0	0	0	0	8.82353	0	0	0	0	0	0	0	0	0	0	0	0	0	0	8.82353	0	0	0	0	0	0	0	0	0
463	GBS	Miss Sound	2007	Pre	20070813	7	11:03:00	4	4	0.266667	30.3685	88.368	1.0-1.49	34	31.5		2430	0	0	0	0	0	3.75	7.5	1391.25	0	0	0	0	0	0	0	0	3.75	0	0	0	93.75	0	15	0	0	0	0	0	0	0	0	0
464	PAP	Miss Sound	2007	Pre	20070813	8	12:11:00	2.8	2	0.0933333	30.3786	88.3117	<1.0	34	31.6		5421.43	0	0	0	0	0	21.4286	0	792.857	42.8571	0	0	0	0	0	0	0	0	0	10.7143	0	171.429	0	0	0	0	0	0	0	0	0	0	0
465	PAP	Miss Sound	2007	Pre	20070813	9	12:37:00	3	2	0.1	30.3782	88.3112	<1.0	34	31.6		3700	0	0	0	0	0	50	0	580	10	0	0	0	0	0	0	0	0	0	0	0	80	0	0	0	0	0	0	0	0	0	0	0
466	PAP	Miss Sound	2007	Pre	20070813	10	12:56:00	3	2	0.1	30.3765	88.312	<1.0	34	32		4130	0	0	0	0	0	70	40	940	10	0	0	0	0	0	0	0	0	0	0	0	70	0	0	0	0	0	0	0	0	0	0	0
467	PAP	Miss Sound	2007	Pre	20070813	11	13:18:00	4	2	0.133333	30.3759	88.3123	<1.0	34	32.3		1950	0	0	0	0	0	15	7.5	532.5	0	0	0	0	0	0	0	0	22.5	0	15	0	187.5	0	0	0	0	0	0	0	0	0	0	0
468	Ship Is	Gulf Is	2007	Pre	20070814	1	09:44:00	3	2	0.1	30.2445	88.8835	1.0-1.49	34	30.4		1630	0	0	0	0	0	0	0	20	0	0	0	0	0	0	0	0	0	0	0	0	0	0	0	0	0	0	0	0	0	0	0	0
469	Ship Is	Gulf Is	2007	Pre	20070814	2	10:11:00	2.9	2	0.0966667	30.2446	88.884	1.5-1.99	34	30.1		1210.34	0	0	0	0	0	0	0	72.4138	0	0	0	0	0	0	0	0	10.3448	0	0	0	0	0	0	0	0	0	0	0	0	0	0	0
470	Ship Is	Gulf Is	2007	Pre	20070814	3	10:33:00	2.7	3	0.135	30.2432	88.8835	1.0-1.49	34	30		1540.74	0	0	0	0	0	0	7.40741	44.4444	0	0	0	0	0	0	0	0	0	0	0	0	0	0	0	0	0	0	0	0	0	0	0	0
471	Ship Is	Gulf Is	2007	Pre	20070814	4	10:49:00	2.5	2	0.0833333	30.2449	88.8843	1.5-1.99	34	30.1		1116	0	0	0	0	0	0	0	132	0	0	0	0	0	0	0	0	0	0	0	0	0	0	0	0	0	0	0	0	0	0	0	0
472	Ship Is	Gulf Is	2007	Pre	20070814	5	11:07:00	3.3	2	0.11	30.244	88.8848	1.0-1.49	34	30.1		1254.55	0	0	0	0	0	0	0	90.9091	9.09091	0	0	0	0	0	0	0	18.1818	0	0	0	0	0	0	0	0	0	0	0	0	0	0	0
473	Ship Is	Gulf Is	2007	Pre	20070814	6	11:28:00	3.5	2	0.116667	30.2435	88.8855	1.0-1.49	34	30.1		865.714	0	0	0	0	0	0	0	17.1429	0	0	0	0	0	0	0	0	0	0	0	0	0	0	0	0	0	0	0	0	0	0	0	0
474	Ship Is	Gulf Is	2007	Pre	20070814	7	11:52:00	3.6	2	0.12	30.2427	88.8837	<1.0	34	30.2		191.667	0	0	0	0	0	0	0	33.3333	0	0	0	0	0	0	0	0	0	0	0	0	0	0	0	0	0	0	0	0	0	0	0	0
475	Ship Is	Gulf Is	2007	Pre	20070814	8	12:25:00	3.5	5	0.291667	30.2159	88.9529	1.0-1.49	34	30.9		853.714	0	0	0	0	0	0	44.5714	27.4286	0	0	0	0	0	0	0	0	0	0	0	0	0	0	0	0	0	0	0	0	0	0	0	0
476	Ship Is	Gulf Is	2007	Pre	20070814	9	12:51:00	3.4	5	0.283333	30.2155	88.957	1.0-1.49	34	31.1		903.529	0	0	0	0	0	0	24.7059	109.412	0	0	0	0	0	0	0	0	0	0	0	0	0	0	0	0	0	0	0	0	0	0	0	0
477	Ship Is	Gulf Is	2007	Pre	20070814	10	13:31:00	3.7	2	0.123333	30.2469	88.8791	1.0-1.49	34	31.4		1451.35	0	0	0	0	0	0	89.1892	0	0	0	0	0	0	0	0	0	16.2162	0	0	0	0	0	0	0	0	0	0	0	0	0	0	0
478	Ship Is	Gulf Is	2007	Pre	20070814	11	13:48:00	3.2	2	0.106667	30.2467	88.8791	1.0-1.49	34	31.1		7359.37	0	0	0	0	0	0	0	37.5	0	0	0	0	0	0	0	0	0	0	0	0	0	0	0	0	0	0	0	0	0	0	0	0
479	Ship Is	Gulf Is	2007	Pre	20070814	12	14:03:00	3.5	2	0.116667	30.2481	88.8819	1.0-1.49	34	31.2		5125.71	0	0	0	0	0	0	0	68.5714	0	0	0	0	0	0	0	0	0	0	0	0	0	0	0	0	0	0	0	0	0	0	0	0
480	Pen	Florida Bays	2007	Pre	20070815	1	09:06:00	6	2	0.2	30.3604	87.2048	1.5-1.99	30	30		1085	0	0	0	0	0	0	0	0	0	0	0	0	0	0	0	0	30	0	0	0	0	0	0	0	0	0	0	0	0	0	0	0
481	Pen	Florida Bays	2007	Pre	20070815	2	09:21:00	4.2	2	0.14	30.3605	87.2041	1.0-1.49	30	30		1864.29	0	0	0	0	0	0	0	0	0	0	0	0	0	0	0	0	0	0	0	0	0	0	0	0	0	0	0	0	0	0	0	0
482	Pen	Florida Bays	2007	Pre	20070815	3	09:36:00	3.8	2	0.126667	30.3559	87.1995	<1.0	30	30		1342.11	0	0	0	0	0	0	0	0	0	0	0	0	0	0	0	0	0	0	0	0	0	0	0	0	0	0	0	0	0	0	0	0
483	Pen	Florida Bays	2007	Pre	20070815	4	09:47:00	3.9	2	0.13	30.3554	87.1988	>2.0	30	30.1		676.923	0	0	0	0	0	0	0	0	0	0	0	0	0	0	0	0	38.4615	0	0	0	0	0	0	0	0	0	0	0	0	0	0	0
484	Pen	Florida Bays	2007	Pre	20070815	5	09:59:00	4	2	0.133333	30.3551	87.1993	<1.0	30	30.1		907.5	0	0	0	0	0	0	0	7.5	7.5	0	0	0	0	0	0	0	0	0	0	0	0	0	0	0	0	0	0	0	0	0	0	0
485	Pen	Florida Bays	2007	Pre	20070815	6	10:10:00	3.6	2	0.12	30.3538	87.196	1.0-1.49	30	30.1		766.667	0	0	0	0	0	0	0	0	0	0	0	0	0	0	0	0	25	0	0	0	0	0	0	0	0	0	0	0	0	0	0	0
486	Pen	Florida Bays	2007	Pre	20070815	7	10:22:00	4	2	0.133333	30.3533	87.1947	<1.0	30	30.2		480	0	0	0	0	0	0	0	0	0	0	0	0	0	0	0	0	0	0	0	0	0	0	0	0	0	0	0	0	0	0	0	0
487	Pen	Florida Bays	2007	Pre	20070815	8	10:30:00	4.8	2	0.16	30.3531	87.1947	1.0-1.49	30	30.4		1187.5	0	0	0	0	0	0	0	18.75	0	0	0	0	0	0	0	0	25	0	0	0	0	0	0	0	0	0	0	0	0	0	0	0
488	Pen	Florida Bays	2007	Pre	20070815	9	10:51:00	4	2	0.133333	30.3517	87.1922	<1.0	30	30.8		727.5	0	0	0	0	0	0	0	0	0	0	0	0	0	0	0	0	0	0	0	0	0	0	0	0	0	0	0	0	0	0	0	0
489	Pen	Florida Bays	2007	Pre	20070815	10	10:59:00	4.1	2	0.136667	30.3506	87.1908	1.0-1.49	30	30.1		563.415	0	0	0	0	0	0	0	21.9512	0	0	0	0	0	0	0	0	0	0	0	0	0	0	0	0	0	0	0	0	0	0	0	0
490	SRS	Florida Bays	2007	Pre	20070815	11	11:23:00	5.3	2	0.176667	30.3563	87.153	<1.0	32	31.2		894.34	0	0	0	0	0	0	0	5.66038	0	0	0	0	0	0	0	0	0	0	0	0	11.3208	0	0	0	0	0	0	0	0	0	0	0
491	SRS	Florida Bays	2007	Pre	20070815	12	11:35:00	3.9	2	0.13	30.3554	87.153	<1.0	32	31.4		1130.77	0	0	0	0	0	0	0	30.7692	7.69231	0	0	0	0	0	0	0	0	0	0	0	23.0769	0	0	0	0	0	0	0	0	0	0	0
492	SRS	Florida Bays	2007	Pre	20070815	13	11:50:00	3.9	2	0.13	30.3516	87.1506	1.0-1.49	32	31.4		1784.62	0	0	0	0	0	0	0	30.7692	7.69231	0	0	0	0	0	0	0	7.69231	0	0	0	7.69231	0	0	0	0	0	0	0	0	0	0	0
493	SRS	Florida Bays	2007	Pre	20070815	14	12:06:00	4.1	2	0.136667	30.3568	87.1493	1.0-1.49	32	31.6		2451.22	0	0	0	0	0	0	0	226.829	21.9512	0	0	0	0	0	0	0	7.31707	0	0	0	0	0	0	0	0	0	0	0	0	0	0	0
494	SRS	Florida Bays	2007	Pre	20070815	15	12:23:00	4	2	0.133333	30.3596	87.1488	<1.0	32	31.8		2025	0	0	0	0	0	7.5	0	105	45	0	0	0	0	0	0	0	7.5	0	0	0	15	0	0	0	0	0	0	0	0	0	0	0
495	SRS	Florida Bays	2007	Pre	20070815	16	12:58:00	4.4	2	0.146667	30.349	87.0791	1.0-1.49	32	31.8		3906.82	0	0	0	0	0	0	0	340.909	20.4545	0	0	0	0	0	0	0	6.81818	0	0	0	47.7273	0	0	0	0	0	0	0	0	0	0	0
496	SRS	Florida Bays	2007	Pre	20070815	17	13:16:00	4.8	2	0.16	30.3511	87.0705	<1.0	32	31.6		4068.75	0	0	0	0	0	12.5	0	718.75	50	0	0	0	0	0	0	0	6.25	0	0	0	18.75	0	0	0	0	0	0	0	0	0	0	0
497	SRS	Florida Bays	2007	Pre	20070815	18	13:45:00	5.7	2	0.19	30.3524	87.0778	1.0-1.49	32	32.1		994.737	0	0	0	0	0	0	0	31.5789	47.3684	0	0	0	0	0	0	0	0	0	0	0	15.7895	0	0	0	0	0	0	0	0	0	0	0
498	SRS	Florida Bays	2007	Pre	20070815	19	14:05:00	4.8	2	0.16	30.3505	87.0725	<1.0	32	32		2637.5	0	0	0	0	0	0	0	462.5	18.75	0	0	0	0	0	0	0	6.25	0	0	0	0	0	0	0	0	0	0	0	0	0	0	0
499	SRS	Florida Bays	2007	Pre	20070815	20	14:24:00	4.5	2	0.15	30.3505	87.1193	<1.0	32	31.6		2673.33	0	0	0	0	0	0	0	180	20	0	0	0	0	0	0	0	13.3333	0	0	0	40	0	0	0	0	0	0	0	0	0	0	0
500	Choc	Florida Bays	2007	Pre	20070828	1	10:01:00	4.8	2	0.16	30.4156	86.4931	1.0-1.49	30	29.4		1231.25	0	0	0	0	0	0	0	212.5	0	0	0	0	0	0	0	0	0	0	0	0	6.25	0	0	0	0	0	0	0	0	0	0	0
501	Choc	Florida Bays	2007	Pre	20070828	2	10:24:00	4.5	2	0.15	30.4167	86.4843	1.0-1.49	30	29.8		1433.33	0	0	0	0	0	0	0	226.667	0	0	0	0	0	0	0	0	6.66667	0	0	0	6.66667	0	0	0	0	0	0	0	0	0	0	0
502	Choc	Florida Bays	2007	Pre	20070828	3	10:50:00	4.6	2	0.153333	30.4169	86.4843	1.0-1.49	30	29.6		1278.26	0	0	0	0	0	0	0	123.913	0	0	0	0	0	0	0	0	0	0	0	0	6.52174	0	0	0	0	0	0	0	0	0	0	0
503	Choc	Florida Bays	2007	Pre	20070828	4	11:12:00	4.5	2	0.15	30.4174	86.4936	<1.0	30	29.6		2080	0	0	0	0	0	0	0	100	0	0	0	0	0	0	0	0	0	0	0	0	0	0	0	0	0	0	0	0	0	0	0	0
504	Choc	Florida Bays	2007	Pre	20070828	5	13:21:00	4.4	2	0.146667	30.4032	86.522	1.0-1.49	31	29.5		1002.27	0	0	0	0	0	0	0	34.0909	6.81818	0	0	0	0	0	0	0	0	0	0	0	0	0	0	0	0	0	0	0	0	0	0	0
505	Choc	Florida Bays	2007	Pre	20070828	6	13:36:00	4.5	2	0.15	30.4029	86.5245	1.0-1.49	31	29.8		1733.33	0	0	0	0	0	0	0	13.3333	0	0	0	0	0	0	0	0	6.66667	0	0	0	0	0	0	0	0	0	0	0	0	0	0	0
506	Choc	Florida Bays	2007	Pre	20070828	7	13:58:00	4.6	2	0.153333	30.4027	86.526	1.0-1.49	31	29.7		3045.65	0	0	0	0	0	0	0	0	0	0	0	0	0	0	0	0	0	0	0	0	0	0	0	0	0	0	0	0	0	0	0	0
507	Choc	Florida Bays	2007	Pre	20070828	8	14:23:00	4.4	2	0.146667	30.4024	86.5276	1.0-1.49	31	29.6		2972.73	0	0	0	0	0	0	0	13.6364	13.6364	0	0	0	0	0	0	0	0	0	0	0	0	0	0	0	0	0	0	0	0	0	0	0
508	Choc	Florida Bays	2007	Pre	20070828	9	14:52:00	4.4	2	0.146667	30.4004	86.527	1.0-1.49	31	29.9		797.727	0	0	0	0	0	0	0	0	13.6364	0	0	0	0	0	0	0	0	0	0	0	0	0	0	0	0	0	0	0	0	0	0	0
509	Choc	Florida Bays	2007	Pre	20070828	10	15:07:00	4.8	2	0.16	30.4002	86.5282	1.0-1.49	31	29.3		1193.75	0	0	0	0	0	0	0	6.25	0	0	0	0	0	0	0	0	6.25	0	0	0	6.25	0	0	0	0	0	0	0	0	0	0	0
510	Choc	Florida Bays	2007	Pre	20070828	11	15:27:00	4.4	2	0.146667	30.3986	86.5302	1.0-1.49	31.4	29.4		1288.64	0	0	0	0	0	0	0	27.2727	0	0	0	0	0	0	0	0	6.81818	0	0	0	6.81818	0	0	0	0	0	0	0	0	0	0	0
511	Choc	Florida Bays	2007	Pre	20070828	12	15:51:00	4.7	2	0.156667	30.3991	86.5311	1.0-1.49	31.5455	29.6		1576.6	0	0	0	0	0	0	0	25.5319	6.38298	0	0	0	0	0	0	0	0	0	0	0	0	0	0	0	0	0	0	0	0	0	0	0
512	Choc	Florida Bays	2007	Pre	20070828	13	16:18:00	4.1	2	0.136667	30.3953	86.5244	<1.0	31.6909	29.5		621.951	0	0	0	0	0	0	0	0	7.31707	0	0	0	0	0	0	0	0	0	0	0	0	0	0	0	0	0	0	0	0	0	0	0
513	Choc	Florida Bays	2007	Pre	20070828	14	16:41:00	4.6	2	0.153333	30.3956	86.5363	<1.0	31.8364	29.5		1089.13	0	0	0	0	0	0	6.52174	273.913	26.087	0	0	0	0	0	0	0	0	0	0	0	0	0	0	0	0	0	0	0	0	0	0	0
514	Choc	Florida Bays	2007	Pre	20070828	15	17:05:00	4.2	2	0.14	30.3954	86.5342	1.0-1.49	31.9818	29.6		1021.43	0	0	0	0	0	0	0	228.571	7.14286	0	0	0	0	0	0	0	0	0	0	0	0	0	0	0	0	0	0	0	0	0	0	0
515	Choc	Florida Bays	2007	Pre	20070828	16	17:31:00	4.1	2	0.136667	30.3948	86.5318	<1.0	32.1273	29.6		1419.51	0	0	0	0	0	0	0	468.293	36.5854	0	0	0	0	0	0	0	0	0	0	0	7.31707	0	0	0	0	0	0	0	0	0	0	0
516	Choc	Florida Bays	2007	Pre	20070828	17	18:13:00	4.6	2	0.153333	30.4121	86.4938	1.0-1.49	30	29.6		1402.17	0	0	0	0	0	0	0	58.6957	0	0	0	0	0	0	0	0	0	0	0	0	13.0435	0	0	0	0	0	0	0	0	0	0	0
517	Choc	Florida Bays	2007	Pre	20070828	18	18:32:00	4.5	2	0.15	30.4142	86.4953	<1.0	30	29.6		673.333	0	0	0	0	0	0	0	93.3333	0	0	0	0	0	0	0	0	0	0	0	0	6.66667	0	0	0	0	0	0	0	0	0	0	0
518	SAS	Florida Bays	2007	Pre	20070829	1	09:11:00	4.4	2	0.146667	30.0907	85.6693	<1.0	36	29.7		1356.82	0	0	0	0	0	0	0	40.9091	0	0	0	0	0	0	0	0	6.81818	0	0	0	0	0	0	0	0	0	0	0	0	0	0	0
519	SAS	Florida Bays	2007	Pre	20070829	2	09:30:00	4.7	2	0.156667	30.0909	85.6704	<1.0	36	29.6		1997.87	0	0	0	0	0	0	0	0	0	0	0	0	0	0	0	0	31.9149	0	0	0	0	0	0	0	0	0	0	0	0	0	0	0
520	SAS	Florida Bays	2007	Pre	20070829	3	09:50:00	4.7	2	0.156667	30.0915	85.672	1.0-1.49	36	29.8		2489.36	0	0	0	0	0	0	12.766	0	0	0	0	0	0	0	0	0	31.9149	0	0	0	0	0	0	0	0	0	0	0	0	0	0	0
521	SAS	Florida Bays	2007	Pre	20070829	4	10:15:00	4.7	2	0.156667	30.0924	85.6786	1.0-1.49	36	29.9		2923.4	0	0	0	0	0	0	0	159.574	0	0	0	0	0	0	0	0	44.6809	0	0	0	19.1489	0	0	0	0	0	0	0	0	0	0	0
522	SAS	Florida Bays	2007	Pre	20070829	5	10:41:00	4.7	2	0.156667	30.0931	85.6803	1.0-1.49	36	30		1902.13	0	0	0	0	0	0	0	82.9787	0	0	0	0	0	0	0	0	44.6809	0	0	0	0	0	0	0	0	0	0	0	0	6.38298	0	0
523	SAS	Florida Bays	2007	Pre	20070829	6	11:07:00	4.7	2	0.156667	30.1053	85.6723	1.0-1.49	36	30.4		1717.02	0	0	0	0	0	0	0	0	0	0	0	0	0	0	0	6.38298	0	0	0	0	0	0	0	0	0	0	0	0	0	0	0	0
524	SAS	Florida Bays	2007	Pre	20070829	7	11:27:00	4.5	2	0.15	30.1068	85.6741	<1.0	36	31		1940	0	0	0	0	0	0	0	26.6667	0	0	0	0	0	0	0	0	0	0	0	0	0	0	0	0	0	0	0	0	0	0	0	0
525	SAS	Florida Bays	2007	Pre	20070829	8	11:49:00	4.8	2	0.16	30.1271	85.6856	1.0-1.49	36	30.8		1131.25	0	0	0	0	0	0	0	0	0	0	0	0	0	0	0	0	6.25	0	0	0	0	0	0	0	0	0	0	0	0	0	0	0
526	SAS	Florida Bays	2007	Pre	20070829	9	12:07:00	4.3	2	0.143333	30.1285	85.6846	1.0-1.49	36	30.8		1416.28	0	0	0	0	0	0	0	6.97674	0	0	0	0	0	0	0	0	0	0	0	0	0	0	0	0	0	0	0	0	0	20.9302	0	0
527	SAS	Florida Bays	2007	Pre	20070829	10	12:36:00	4.6	2	0.153333	30.1296	85.6667	1.0-1.49	36	30.9		410.87	0	0	0	0	0	0	0	0	0	0	0	0	0	0	0	0	6.52174	0	0	0	0	0	0	0	0	0	0	0	0	6.52174	0	0
528	SAS	Florida Bays	2007	Pre	20070829	11	12:54:00	4.5	2	0.15	30.1309	85.6813	1.0-1.49	36	31.3		1066.67	0	0	0	0	0	0	0	0	0	0	0	0	0	0	0	0	13.3333	0	0	0	0	0	0	0	0	0	0	0	0	0	0	0
529	SAS	Florida Bays	2007	Pre	20070829	12	13:12:00	4.6	2	0.153333	30.1328	85.6795	1.0-1.49	36	31.5		613.043	0	0	0	0	0	0	0	0	0	0	0	0	0	0	0	0	19.5652	0	0	0	0	0	0	0	0	0	0	0	0	0	0	0
530	SAS	Florida Bays	2007	Pre	20070829	13	14:08:00	4.4	2	0.146667	30.1635	85.7302	1.0-1.49	36	31.5		2815.91	0	0	0	0	0	0	0	0	0	0	0	0	0	0	0	0	6.81818	0	0	0	0	0	0	0	0	0	0	0	0	0	0	0
531	SAS	Florida Bays	2007	Pre	20070829	14	14:24:00	4.4	2	0.146667	30.1636	85.7318	1.0-1.49	36	31.7		2140.91	0	0	0	0	0	0	0	0	0	0	0	0	0	0	0	0	75	0	0	0	0	0	0	0	0	0	0	0	0	0	0	0
532	SAS	Florida Bays	2007	Pre	20070829	15	14:41:00	4.2	2	0.14	30.1635	85.7334	<1.0	36	31.8		2700	0	0	0	0	0	0	0	7.14286	7.14286	0	0	0	0	0	0	0	64.2857	0	0	0	0	0	0	0	0	0	0	0	0	0	0	0
533	SAS	Florida Bays	2007	Pre	20070829	16	15:16:00	4.5	2	0.15	30.1969	85.7484	1.0-1.49	36	32		1960	0	0	0	0	0	0	0	0	0	0	0	0	0	0	0	0	13.3333	0	0	0	0	0	0	0	0	0	0	0	0	0	0	0
534	SAS	Florida Bays	2007	Pre	20070829	17	15:39:00	4.3	2	0.143333	30.2378	85.731	1.0-1.49	35	32.3		1444.19	0	0	0	0	0	0	0	0	0	0	0	0	0	0	0	0	6.97674	0	0	0	0	0	0	0	0	0	0	0	0	0	0	0
535	SAS	Florida Bays	2007	Pre	20070829	18	15:57:00	4.3	2	0.143333	30.1873	85.7318	<1.0	35	32.1		1283.72	0	0	0	0	0	0	0	0	0	0	0	0	0	0	0	0	13.9535	0	0	0	6.97674	0	0	0	0	0	0	0	0	0	0	0
536	SAS	Florida Bays	2007	Pre	20070829	19	16:10:00	3.9	2	0.13	30.1882	85.7284	<1.0	35	32.8		1676.92	0	0	0	0	0	0	0	23.0769	0	0	0	0	0	0	0	0	0	0	0	0	23.0769	0	0	0	0	0	0	0	0	0	0	0
537	SAS	Florida Bays	2007	Pre	20070829	20	16:31:00	4.2	2	0.14	30.1916	85.7233	<1.0	35	32.6		2521.43	0	0	0	0	0	0	0	0	0	0	0	0	0	0	0	0	0	0	0	0	35.7143	0	0	0	0	0	0	0	0	0	35.7143	0
538	PSJ	Florida Bays	2007	Pre	20070830	1	07:27:00	4.4	2	0.146667	29.7942	85.3057	1.0-1.49	36	29.8		1315.91	0	0	0	0	0	13.6364	13.6364	27.2727	0	0	0	0	0	0	0	0	13.6364	0	0	0	0	0	0	0	0	0	0	0	0	6.81818	0	0
539	PSJ	Florida Bays	2007	Pre	20070830	2	07:43:00	4.6	2	0.153333	29.7907	85.3058	1.0-1.49	36	29.9		769.565	0	0	0	0	0	0	0	71.7391	0	0	0	0	0	0	0	0	0	0	0	0	0	0	0	0	0	0	0	0	0	0	0	0
540	PSJ	Florida Bays	2007	Pre	20070830	3	07:56:00	4.6	2	0.153333	29.7879	85.3053	<1.0	36	29.8		1226.09	0	0	0	0	0	0	0	6.52174	0	0	0	0	0	0	0	0	6.52174	0	0	0	0	0	0	0	0	0	0	0	0	6.52174	0	0
541	PSJ	Florida Bays	2007	Pre	20070830	4	08:16:00	4	2	0.133333	29.7842	85.3056	<1.0	36	29.7		1612.5	0	0	0	0	0	0	0	0	0	0	0	0	0	0	0	0	30	0	0	0	0	0	0	0	0	0	0	0	0	0	0	0
542	PSJ	Florida Bays	2007	Pre	20070830	5	08:33:00	4.4	2	0.146667	29.7809	85.3066	<1.0	36	29.8		1370.45	0	0	0	0	0	0	0	27.2727	0	0	0	0	0	0	0	0	6.81818	0	0	0	0	0	0	0	0	0	0	0	0	6.81818	0	0
543	PSJ	Florida Bays	2007	Pre	20070830	6	09:19:00	4.7	2	0.156667	29.8052	85.4069	1.0-1.49	35.5	29.6		1965.96	0	0	0	0	0	0	0	0	0	0	0	0	0	0	0	6.38298	57.4468	0	0	0	0	0	0	0	0	6.38298	0	0	0	6.38298	0	0
544	PSJ	Florida Bays	2007	Pre	20070830	7	09:38:00	4.7	2	0.156667	29.8035	85.4065	1.0-1.49	35.5	29.5		1148.94	0	0	0	0	0	0	0	0	6.38298	0	0	0	0	0	0	6.38298	31.9149	0	0	0	0	0	0	6.38298	0	0	0	0	0	0	0	0
545	PSJ	Florida Bays	2007	Pre	20070830	8	10:08:00	4.2	2	0.14	29.8483	85.3984	1.0-1.49	35.5	29.7		1978.57	0	0	7.14286	0	0	0	0	28.5714	0	0	0	0	0	0	0	0	50	0	0	0	0	0	0	0	0	0	0	0	0	35.7143	0	0
546	PSJ	Florida Bays	2007	Pre	20070830	9	10:32:00	3	2	0.1	29.849	85.3988	<1.0	35.5	29.2		640	0	0	20	0	0	0	0	0	0	0	0	0	0	0	0	0	50	0	0	0	10	0	0	0	0	0	0	0	0	0	0	0
547	PSJ	Florida Bays	2007	Pre	20070830	10	11:02:00	4	2	0.133333	29.8475	85.3987	1.0-1.49	35.5	30.2		1005	0	0	0	0	0	0	0	0	0	0	0	0	0	0	0	0	7.5	0	0	0	0	0	0	0	0	0	0	0	0	7.5	0	0
548	PSJ	Florida Bays	2007	Pre	20070830	11	11:42:00	4.3	2	0.143333	29.7196	85.3408	1.0-1.49	35.5	30.8		2560.47	0	0	0	0	0	0	0	6.97674	0	0	0	0	0	0	0	0	48.8372	0	0	0	0	0	0	0	0	0	0	0	0	0	0	0
549	PSJ	Florida Bays	2007	Pre	20070830	12	12:01:00	2.6	2	0.0866667	29.7197	85.339	<1.0	35.5	31.1		323.077	0	0	0	0	0	0	0	0	0	0	0	0	0	0	0	0	23.0769	0	0	0	0	0	0	0	0	0	0	0	0	0	0	0
550	PSJ	Florida Bays	2007	Pre	20070830	13	12:27:00	4.4	2	0.146667	29.6882	85.3593	<1.0	39	31.1		1452.27	0	0	0	0	0	0	0	88.6364	0	0	0	0	0	0	0	0	27.2727	0	0	0	0	0	0	0	0	0	0	0	0	0	0	0
551	PSJ	Florida Bays	2007	Pre	20070830	14	12:45:00	3.5	2	0.116667	29.6865	85.3595	<1.0	39	31.5		2545.71	0	0	0	0	0	0	0	17.1429	0	0	0	0	0	0	0	0	0	0	0	0	0	0	0	0	0	0	0	0	0	0	0	0
552	PSJ	Florida Bays	2007	Pre	20070830	15	13:03:00	4	2	0.133333	29.6848	85.3576	1.5-1.99	39	31.5		547.5	0	0	0	0	0	0	0	0	0	0	0	0	0	0	0	0	7.5	0	0	0	0	0	0	0	0	0	0	0	0	0	0	0
553	PSJ	Florida Bays	2007	Pre	20070830	16	13:44:00	4.3	2	0.143333	29.7757	85.3098	<1.0	39	31.3		2037.21	0	0	0	0	0	0	0	0	0	0	0	0	0	0	0	0	27.907	0	0	0	0	0	0	0	0	0	0	0	0	0	0	0
554	PSJ	Florida Bays	2007	Pre	20070830	17	14:02:00	3.1	2	0.103333	29.7765	85.3054	<1.0	39	31.6		338.71	0	0	0	0	0	0	0	0	0	0	0	0	0	0	0	0	19.3548	0	0	0	0	0	0	0	0	0	0	0	0	0	0	0
555	PSJ	Florida Bays	2007	Pre	20070830	18	14:16:00	3.8	2	0.126667	29.7775	85.3046	<1.0	39	32		1042.11	0	0	0	0	0	0	0	0	0	0	0	0	0	0	0	0	0	0	0	0	0	0	0	0	0	0	0	0	0	0	0	0
556	Mid Bay	Miss Sound	2007	Pre	20070918	1	09:15:00	3.8	2	0.126667	30.3527	88.4098	<1.0	32	24.9		2131.58	0	0	0	0	0	0	0	805.263	0	0	0	0	0	0	0	0	7.89474	0	7.89474	0	307.895	0	23.6842	0	0	0	0	0	0	0	0	0
557	Mid Bay	Miss Sound	2007	Pre	20070918	2	09:43:00	3.5	2	0.116667	30.354	88.4102	<1.0	32	25		891.429	0	0	0	0	0	0	0	94.2857	0	0	0	0	0	0	0	0	0	0	25.7143	0	128.571	0	0	0	0	0	0	0	0	0	0	0
558	Mid Bay	Miss Sound	2007	Pre	20070918	3	09:53:00	4.2	2	0.14	30.3558	88.4116	<1.0	32	25		221.429	0	0	0	0	0	0	0	0	0	0	0	0	0	0	0	0	0	0	7.14286	0	0	0	0	0	0	0	0	0	0	0	0	0
559	Mid Bay	Miss Sound	2007	Pre	20070918	4	10:06:00	3.2	2.5	0.133333	30.3578	88.4119	<1.0	32	24.8		3015	0	0	0	0	0	0	0	555	0	0	0	0	0	0	0	0	0	0	7.5	0	187.5	0	0	0	0	0	0	0	0	0	0	0
560	GBS	Miss Sound	2007	Pre	20070918	5	11:07:00	3.5	2	0.116667	30.3692	88.3643	<1.0	32	26		917.143	0	0	0	0	0	0	0	188.571	0	0	0	0	0	0	0	0	0	0	0	0	42.8571	0	0	0	0	0	0	0	0	0	0	0
561	GBS	Miss Sound	2007	Pre	20070918	6	11:22:00	3.7	2	0.123333	30.3688	88.3648	<1.0	32	26.2		713.514	0	0	0	0	0	0	0	56.7568	0	0	0	0	0	0	0	0	16.2162	0	0	0	40.5405	0	0	0	0	0	0	0	0	0	0	0
562	GBS	Miss Sound	2007	Pre	20070918	7	11:33:00	3.4	2	0.113333	30.3685	88.3672	<1.0	32	26.3		1394.12	0	0	0	0	0	0	0	220.588	0	0	0	0	0	0	0	0	0	0	0	0	194.118	0	0	0	0	0	0	0	0	0	0	0
563	GBS	Miss Sound	2007	Pre	20070918	8	11:57:00	3.5	2	0.116667	30.3692	88.3663	<1.0	32	26.6		1302.86	0	0	0	0	0	0	0	77.1429	0	0	0	0	0	0	0	0	0	0	0	0	0	0	0	0	0	0	0	0	0	0	0	0
578	Horn Is	Gulf Is	2007	Pre	20070925	1	09:49:00	3.1	2	0.103333	30.2314	88.632	1.0-1.49	30	26		474.194	0	0	0	0	0	0	9.67742	154.839	0	0	0	0	0	0	0	0	19.3548	0	0	0	0	0	0	0	0	0	0	0	0	0	0	0
579	Horn Is	Gulf Is	2007	Pre	20070925	2	10:03:00	3.5	2	0.116667	30.2319	88.6344	1.0-1.49	30	25.9		325.714	0	0	0	0	0	0	0	197.143	0	0	0	0	0	0	0	0	0	0	0	0	8.57143	0	0	0	0	0	0	0	0	0	0	0
580	Horn Is	Gulf Is	2007	Pre	20070925	3	10:12:00	3.4	3	0.17	30.2321	88.6371	1.0-1.49	30	25.9		358.824	0	0	0	0	0	0	0	200	5.88235	0	0	0	0	0	0	0	11.7647	0	0	0	0	0	0	0	0	0	0	0	0	0	0	0
581	Horn Is	Gulf Is	2007	Pre	20070925	4	10:24:00	2.8	3	0.14	30.233	88.64	1.5-1.99	30	25.9		78.5714	0	0	0	0	0	0	0	28.5714	0	0	0	0	0	0	0	0	7.14286	0	0	0	0	0	0	0	0	0	0	0	0	0	0	0
582	Horn Is	Gulf Is	2007	Pre	20070925	5	10:34:00	3.5	2.5	0.145833	30.2337	88.6428	1.5-1.99	30	26		75.4286	0	0	0	0	0	0	0	20.5714	0	0	0	0	0	0	0	0	6.85714	0	0	0	0	0	0	0	0	0	0	0	0	0	0	0
583	Horn Is	Gulf Is	2007	Pre	20070925	6	10:47:00	3.3	3	0.165	30.2432	88.6784	1.0-1.49	30	26.2		230.303	0	0	0	0	0	0	0	72.7273	0	42.4242	0	0	0	0	0	0	0	0	0	0	0	0	0	0	0	0	0	0	0	0	0	0
584	Horn Is	Gulf Is	2007	Pre	20070925	7	10:56:00	3.4	3	0.17	30.2437	88.6822	1.0-1.49	30	26.1		270.588	0	0	0	0	0	0	0	147.059	0	0	0	0	0	0	0	0	11.7647	0	0	0	0	0	0	0	0	0	0	0	0	0	0	0
585	Horn Is	Gulf Is	2007	Pre	20070925	8	11:15:00	3.4	2	0.113333	30.2502	88.7237	1.0-1.49	30	26.2		238.235	0	0	0	0	0	0	0	97.0588	0	0	0	0	0	0	0	17.6471	8.82353	0	0	0	0	0	0	0	0	0	0	0	0	0	0	0
586	Horn Is	Gulf Is	2007	Pre	20070925	9	11:24:00	3.2	2	0.106667	30.2487	88.7262	1.0-1.49	30	26.1		581.25	0	0	0	0	0	0	0	365.625	0	0	0	0	0	0	0	0	9.375	0	0	0	0	0	0	0	0	0	0	0	0	0	0	0
587	Horn Is	Gulf Is	2007	Pre	20070925	10	11:36:00	3.3	3	0.165	30.2479	88.7284	1.0-1.49	30	26.1		460.606	0	0	0	0	0	0	0	163.636	0	0	0	0	0	0	0	0	12.1212	0	0	0	0	0	0	0	0	0	0	0	0	0	0	0
588	Horn Is	Gulf Is	2007	Pre	20070925	11	11:56:00	2.8	2	0.0933333	30.2481	88.7271	1.0-1.49	30	26.3		535.714	0	0	0	0	0	0	0	182.143	10.7143	0	0	0	0	0	0	0	0	0	0	0	21.4286	0	0	0	0	0	0	0	0	0	0	0
589	Horn Is	Gulf Is	2007	Pre	20070925	12	12:38:00	3.6	2	0.12	30.247	88.7304	1.0-1.49	30	26.7		175	0	0	0	0	0	0	0	66.6667	0	0	0	0	0	0	0	0	8.33333	0	0	0	0	0	0	0	0	0	0	0	0	0	0	0
590	Horn Is	Gulf Is	2007	Pre	20070925	13	12:50:00	3.4	2	0.113333	30.2472	88.7323	1.0-1.49	30	26.6		441.176	0	0	0	0	0	0	0	141.176	0	0	0	0	0	0	0	0	8.82353	0	0	0	0	0	0	0	0	0	0	0	0	0	0	0
591	Horn Is	Gulf Is	2007	Pre	20070925	14	13:00:00	3.1	3	0.155	30.2467	88.7347	<1.0	30	26.6		619.355	0	0	0	0	0	0	0	270.968	0	0	0	0	0	0	0	0	12.9032	0	0	0	0	0	6.45161	0	0	0	0	0	0	0	0	0
592	Horn Is	Gulf Is	2007	Pre	20070925	15	13:19:00	3.4	3	0.17	30.2466	88.7376	1.0-1.49	30	26.7		382.353	0	0	0	0	0	0	0	223.529	0	0	0	0	0	0	0	0	0	0	0	0	0	0	0	0	0	0	0	0	0	0	0	0
593	Horn Is	Gulf Is	2007	Pre	20070925	16	13:33:00	3.1	4	0.206667	30.2469	88.7477	1.0-1.49	30	26.8		241.935	0	0	0	0	0	0	0	87.0968	0	0	0	0	0	0	0	0	9.67742	0	0	0	0	0	4.83871	0	0	0	0	0	0	0	0	0
594	Big Lag	Florida Bays	2007	Pre	20070926	1	10:55:00	3.2	2	0.106667	30.3247	87.3282	1.5-1.99	27	28.5		2109.38	0	0	9.375	0	0	0	0	9.375	0	0	0	0	0	0	0	0	0	0	0	0	0	0	0	0	0	0	0	0	0	0	0	0
595	Big Lag	Florida Bays	2007	Pre	20070926	2	11:08:00	3	2	0.1	30.324	87.3275	1.5-1.99	27	28.5		1940	0	0	0	0	0	0	0	220	0	0	0	0	0	0	0	0	0	0	0	0	10	0	0	0	0	0	0	0	0	0	0	0
596	Big Lag	Florida Bays	2007	Pre	20070926	3	11:25:00	3.1	2	0.103333	30.3235	87.3265	<1.0	27	28.5		1616.13	0	0	0	0	0	0	0	512.903	0	0	0	0	0	0	0	0	0	0	0	0	29.0323	0	0	0	0	0	0	0	0	0	0	0
597	Big Lag	Florida Bays	2007	Pre	20070926	4	11:43:00	3	2	0.1	30.3228	87.3266	1.5-1.99	27	28.5		6020	0	0	0	0	0	0	0	450	0	0	0	0	0	0	0	0	0	0	0	0	0	0	0	0	0	0	0	0	0	0	0	0
598	Big Lag	Florida Bays	2007	Pre	20070926	5	12:08:00	3.4	2	0.113333	30.3209	87.3291	1.0-1.49	27	28.5		6185.29	0	0	0	0	0	0	8.82353	352.941	0	0	0	0	0	0	0	0	8.82353	0	0	0	0	0	0	0	0	0	0	0	0	0	0	0
599	Big Lag	Florida Bays	2007	Pre	20070926	6	12:28:00	3.1	2	0.103333	30.3205	87.3314	<1.0	27	28.5		5341.94	0	0	0	0	0	0	0	270.968	0	0	0	0	0	0	0	0	0	0	0	0	0	0	0	0	0	0	0	0	0	0	0	0
600	Big Lag	Florida Bays	2007	Pre	20070926	7	12:51:00	2.8	2	0.0933333	30.319	87.3336	<1.0	27	28.5		5400	0	0	0	0	0	0	0	214.286	0	0	0	0	0	0	0	0	0	0	0	0	0	0	0	0	0	0	10.7143	0	0	0	0	0
601	Big Lag	Florida Bays	2007	Pre	20070926	8	01:33:00	3	3	0.15	30.3189	87.3332	<1.0	27	28.5		4313.33	0	0	0	0	0	0	0	206.667	0	0	0	0	0	0	0	0	0	0	0	0	20	0	0	0	0	0	0	0	0	0	0	0
602	Big Lag	Florida Bays	2007	Pre	20070926	9	02:11:00	3.5	2	0.116667	30.3096	87.3767	1.0-1.49	27	28.5		1825.71	0	0	0	0	0	0	0	25.7143	0	0	0	0	0	0	0	0	0	0	0	0	0	0	0	0	0	0	0	0	0	0	0	0
603	Big Lag	Florida Bays	2007	Pre	20070926	10	02:27:00	3	2	0.1	30.3102	87.3749	>2.0	27	28.5		3120	0	0	0	0	0	0	0	430	0	0	0	0	0	0	0	0	20	0	0	0	80	0	0	0	0	0	0	0	0	0	0	0
604	Big Lag	Florida Bays	2007	Pre	20070926	11	02:57:00	2.8	2	0.0933333	30.3107	87.3729	<1.0	27	28.5		2582.14	0	0	0	0	0	0	0	64.2857	10.7143	0	0	0	0	0	0	0	0	0	0	0	32.1429	0	0	0	0	0	0	0	0	0	0	0
605	PSJ	Florida Bays	2007	Pre	20071001	1	10:34:00	3.1	2	0.103333	29.7798	85.3076	1.0-1.49	39	24.7		3261.29	0	0	0	0	0	0	0	29.0323	0	0	0	0	0	0	0	0	48.3871	0	0	0	0	0	0	0	0	0	0	0	0	0	0	0
606	PSJ	Florida Bays	2007	Pre	20071001	2	10:57:00	3.4	2	0.113333	29.7759	85.3088	1.0-1.49	39	24.9		5188.24	0	0	0	0	0	8.82353	0	35.2941	0	0	0	0	0	0	0	0	105.882	0	0	0	0	0	0	0	0	8.82353	0	0	0	0	0	0
607	PSJ	Florida Bays	2007	Pre	20071001	3	11:26:00	2.8	2	0.0933333	29.7871	85.3062	1.0-1.49	39	25.3		985.714	0	0	0	0	0	0	0	21.4286	0	0	0	0	0	0	0	0	0	0	0	0	0	0	0	0	0	0	0	0	0	0	0	0
608	PSJ	Florida Bays	2007	Pre	20071001	4	11:40:00	3	2	0.1	29.7773	85.3083	1.0-1.49	39	25.1		6750	0	0	0	0	0	0	0	250	0	0	0	0	0	0	0	0	80	0	0	0	0	0	0	0	0	0	0	0	0	0	0	0
609	PAP	Miss Sound	2007	Pre	20071008	1	01:40:00	4.4	2	0.146667	30.3784	88.3121	<1.0	27	26		409.091	0	0	0	0	0	0	0	0	0	0	0	0	0	0	0	0	6.81818	0	0	27.2727	6.81818	0	13.6364	0	0	0	0	0	0	0	0	0
610	PAP	Miss Sound	2007	Pre	20071008	2	01:53:00	4.4	2	0.146667	30.3787	88.311	<1.0	27	26.2		2120.45	0	0	0	0	0	40.9091	0	300	13.6364	0	0	0	0	0	0	0	0	0	0	6.81818	218.182	0	0	0	0	0	0	0	0	0	0	0
611	PAP	Miss Sound	2007	Pre	20071008	3	02:22:00	4.4	2	0.146667	30.3747	88.3127	<1.0	27	26.3		2018.18	0	0	0	0	0	6.81818	0	265.909	0	0	0	0	0	0	0	0	6.81818	0	0	0	47.7273	0	0	0	0	0	0	0	0	0	0	0
612	PAP	Miss Sound	2007	Pre	20071008	4	02:48:00	4.4	2	0.146667	30.3815	88.3021	<1.0	27	26.6		197.727	0	0	0	0	0	0	122.727	0	0	0	0	0	0	0	0	0	0	0	6.81818	0	0	0	0	0	0	0	0	0	0	0	0	0
613	PAP	Miss Sound	2007	Pre	20071008	5	02:58:00	4.4	2	0.146667	30.3865	88.297	<1.0	27	26.75		81.8182	0	0	0	0	0	0	6.81818	0	0	0	0	0	0	0	0	0	6.81818	0	0	0	0	0	6.81818	0	0	0	0	0	0	0	0	0
614	B St John	Florida Bays	2007	Pre	20071019	1	13:11:00	4.4	2	0.146667	30.3118	87.4989	1.0-1.49	12	23.9		150	0	0	0	0	0	0	0	0	0	0	0	0	0	0	0	0	0	0	0	0	0	0	0	0	0	0	0	0	0	0	0	0
615	B St John	Florida Bays	2007	Pre	20071019	2	13:21:00	4.8	2	0.16	30.3099	87.4865	1.0-1.49	12	24		62.5	0	0	0	0	0	0	0	0	0	0	0	0	0	0	0	0	0	0	0	0	0	0	0	0	0	0	0	0	0	0	0	0
616	B St John	Florida Bays	2007	Pre	20071019	3	13:26:00	4.2	2	0.14	30.3096	87.4839	>2.0	25	23.8		1571.43	0	0	0	0	0	0	0	0	0	0	0	0	0	0	0	0	0	21.4286	0	0	7.14286	0	0	0	0	0	0	0	0	0	0	0
617	B St John	Florida Bays	2007	Pre	20071019	4	13:36:00	3.8	2	0.126667	30.3097	87.4808	1.0-1.49	25	23.9		1602.63	0	0	0	0	0	0	0	86.8421	0	0	0	0	0	0	0	0	0	0	0	0	15.7895	0	0	0	0	0	0	0	0	0	0	0
618	B St John	Florida Bays	2007	Pre	20071019	5	13:46:00	4.3	2	0.143333	30.3102	87.4794	1.5-1.99	25	23.9		453.488	0	0	0	0	0	0	0	0	0	0	0	0	0	0	0	0	0	0	0	0	13.9535	0	0	0	0	0	0	0	0	0	0	0
619	B St John	Florida Bays	2007	Pre	20071019	6	13:55:00	4.5	2	0.15	30.3091	87.48	1.5-1.99	25	23.7		1286.67	0	0	0	0	0	0	0	240	0	0	0	0	0	0	0	0	0	0	0	0	26.6667	0	0	0	0	0	0	0	0	0	0	0
620	B St John	Florida Bays	2007	Pre	20071019	7	14:08:00	3.2	2	0.106667	30.3087	87.4809	1.0-1.49	25	24.2		1856.25	0	0	0	0	0	0	0	168.75	0	0	0	0	0	0	0	0	0	0	0	0	18.75	0	0	0	0	0	0	0	0	0	0	0
621	B St John	Florida Bays	2007	Pre	20071019	8	14:21:00	4.8	2	0.16	30.3096	87.4789	1.5-1.99	25	24.2		1381.25	0	0	0	0	0	0	0	93.75	0	0	0	0	0	0	0	0	0	0	0	0	68.75	0	0	0	0	0	0	0	0	0	0	0
622	B St John	Florida Bays	2007	Pre	20071019	9	14:35:00	4.7	2	0.156667	30.3101	87.4776	1.5-1.99	25	24.1		197.872	0	0	0	0	0	0	0	0	0	0	0	0	0	0	0	0	0	0	6.38298	0	6.38298	0	12.766	0	0	0	0	0	0	0	0	0
623	B St John	Florida Bays	2007	Pre	20071019	10	14:44:00	4.1	2	0.136667	30.3102	87.475	>2.0	25	23.9		80.4878	0	0	0	0	0	0	0	0	0	0	0	0	0	0	0	0	0	0	0	0	0	0	0	0	0	0	0	0	0	0	0	0
625	B St John	Florida Bays	2007	Pre	20071019	12	15:06:00	4.1	3	0.205	30.3098	87.4694	1.0-1.49	25	24		29.2683	0	0	0	0	0	0	0	4.87805	0	0	0	0	0	0	0	0	0	0	0	0	0	0	0	0	0	0	0	0	0	0	0	0
701	PB Is	Gulf Is	2008	Pre	20080728	1	09:36:00	3	5	0.25			>2.0	29			484	0	0	0	0	0	0	0	152	0	0	0	0	0	0	0	0	8	0	0	0	0	0	0	0	0	0	0	0	0	0	0	0
702	PB Is	Gulf Is	2008	Pre	20080728	2	10:04:00	3	6	0.3			>2.0	29			380	0	0	0	0	0	0	0	73.3333	6.66667	0	0	0	0	0	0	0	10	0	0	0	0	0	0	0	0	0	0	0	0	0	0	0
703	PB Is	Gulf Is	2008	Pre	20080728	3	10:35:00	3	5	0.25			1.5-1.99	29			472	0	0	0	0	0	0	0	84	0	0	0	0	0	0	0	0	12	0	0	0	0	0	0	0	0	0	0	0	0	0	0	0
704	PB Is	Gulf Is	2008	Pre	20080728	4	11:30:00	3	8	0.4			1.5-1.99	29			547.5	0	0	0	0	0	0	0	165	2.5	0	0	0	0	0	0	0	0	0	0	0	5	0	0	0	0	0	0	0	0	0	0	0
705	Horn Is	Gulf Is	2008	Pre	20080728	5	12:40:00	3	5	0.25			1.5-1.99	29			412	0	0	0	0	0	0	0	276	4	0	0	0	0	0	0	0	4	0	0	0	0	0	0	0	0	0	0	0	0	0	0	0
706	Horn Is	Gulf Is	2008	Pre	20080728	6	13:08:00	3	5	0.25			1.5-1.99	29			116	0	0	0	0	0	0	4	16	0	0	0	0	0	0	0	0	12	0	0	0	0	0	0	0	0	0	0	0	0	0	0	0
707	DI	Gulf Is	2008	Pre	20080728	7	14:43:00	3	5	0.25			1.5-1.99	29		No grass	148	0	0	0	0	0	0	0	80	0	0	0	0	0	0	0	0	0	0	0	0	0	0	0	0	0	0	0	0	0	0	0	0
708	DI	Gulf Is	2008	Pre	20080728	8	15:03:00	3	5	0.25			1.5-1.99	29			184	0	0	0	0	0	0	0	148	0	0	0	0	0	0	0	0	8	0	4	0	0	0	0	0	0	0	0	0	0	0	0	0
709	Mid Bay	Miss Sound	2008	Pre	20080729	1	08:53:00	3.1	2.5	0.129167	30.2114	88.246	1.0-1.49				270.968	0	0	0	0	0	0	0	123.871	15.4839	0	0	0	0	0	0	0	0	0	0	0	0	0	7.74194	0	0	0	0	0	0	0	0	0
710	Mid Bay	Miss Sound	2008	Pre	20080729	2	09:12:00	3	2	0.1	30.1217	88.2459	1.0-1.49				140	0	0	0	0	0	10	0	0	10	0	0	0	0	0	0	0	0	0	0	0	0	0	0	0	0	0	0	0	0	0	0	0
711	Mid Bay	Miss Sound	2008	Pre	20080729	3	09:25:00	2.6	2	0.0866667	30.2141	88.2469	1.0-1.49				230.769	0	0	0	0	0	0	0	57.6923	11.5385	0	0	0	0	0	0	0	0	0	0	0	0	0	0	0	0	0	0	0	0	0	0	0
712	PAP	Miss Sound	2008	Pre	20080729	4	10:05:00	2.5	2	0.0833333	30.2273	88.1867	<1.0				732	0	0	0	0	0	0	0	264	0	0	0	0	0	0	0	0	0	0	0	0	12	0	0	0	0	0	0	0	0	0	0	0
713	PAP	Miss Sound	2008	Pre	20080729	5	10:11:00	2.3	2	0.0766667	30.2272	88.1866	<1.0	28			1956.52	0	0	0	0	0	0	52.1739	1200	0	0	0	0	0	0	0	0	0	0	0	0	221.739	0	0	0	0	0	0	0	0	0	0	0
714	PAP	Miss Sound	2008	Pre	20080729	6	10:27:00	2.5	2.5	0.104167	30.2263	88.1869	<1.0				4099.2	0	0	0	0	0	0	883.2	2582.4	0	0	0	0	0	0	0	0	0	0	0	0	230.4	0	0	0	0	0	0	0	0	0	0	0
715	PAP	Miss Sound	2008	Pre	20080729	7		2.2	2.5	0.0916667	30.3061	88.182	1.5-1.99				392.727	0	0	0	0	0	0	109.091	0	0	0	0	0	0	0	0	0	0	21.8182	0	0	0	0	32.7273	0	0	0	0	0	0	0	0	0
716	SRS	Florida Bays	2008	Pre	20080730	1	10:17:00	4.2	2	0.14	30.2147	87.0891		30			285.714	0	0	0	0	0	0	0	71.4286	0	0	0	0	0	0	0	0	0	0	0	0	7.14286	0	0	0	0	0	0	0	0	0	0	0
717	SRS	Florida Bays	2008	Pre	20080730	2	10:24:00	3.5	2	0.116667	30.2151	87.0892		30			1080	0	0	0	0	0	8.57143	0	565.714	0	0	8.57143	0	0	0	0	0	0	0	0	0	25.7143	0	0	0	0	0	0	0	0	0	0	0
718	SRS	Florida Bays	2008	Pre	20080730	3	10:31:00	3.3	2	0.11	30.2155	87.0882		30			790.909	0	0	0	0	0	0	0	127.273	0	0	0	0	0	0	0	0	0	0	0	0	9.09091	0	0	0	0	0	0	0	0	0	0	0
719	SRS	Florida Bays	2008	Pre	20080730	4	10:38:00	2.9	2	0.0966667	30.2157	87.0872		30			1510.34	0	0	0	0	0	0	0	62.069	0	0	0	0	0	0	0	0	0	0	0	0	0	0	0	0	0	0	0	0	0	0	0	0
720	SRS	Florida Bays	2008	Pre	20080730	5	10:45:00	3.5	2	0.116667	30.2157	87.0864		30			342.857	0	0	0	0	0	0	0	42.8571	0	0	0	0	0	0	0	0	0	0	0	0	0	0	0	0	0	0	0	0	0	0	0	0
721	SRS	Florida Bays	2008	Pre	20080730	6	10:52:00	3.4	2.5	0.141667	30.2158	87.0853		30			360	0	0	0	0	0	0	0	7.05882	0	0	0	0	0	0	0	0	0	0	0	0	0	0	0	0	0	0	0	0	0	0	0	0
722	SRS	Florida Bays	2008	Pre	20080730	7	11:13:00	3.4	2	0.113333	30.2105	87.0453		30			5197.06	0	0	0	0	0	0	0	1720.59	26.4706	0	0	0	0	0	0	0	26.4706	0	0	0	0	0	0	0	0	0	0	0	0	0	0	0
723	SRS	Florida Bays	2008	Pre	20080730	8	11:23:00	3.4	2.33	0.132033	30.2112	87.0445		30			1378.44	0	0	0	0	0	0	0	219.642	0	0	0	0	0	0	0	0	0	15.1477	0	0	0	0	0	0	0	0	0	0	0	0	0	0
724	SRS	Florida Bays	2008	Pre	20080730	9	11:38:00	3.5	3	0.175	30.2102	87.0426		30			925.714	0	0	0	0	0	0	0	114.286	0	0	0	0	0	0	0	0	0	5.71429	0	0	0	0	0	0	0	0	0	0	0	0	0	0
725	SRS	Florida Bays	2008	Pre	20080730	10	11:45:00	2.9	3	0.145	30.2103	87.0414		30			2379.31	0	0	0	0	0	0	0	372.414	13.7931	0	0	0	0	0	0	0	0	6.89655	0	0	0	0	0	0	0	0	0	0	0	0	0	0
726	SRS	Florida Bays	2008	Pre	20080730	11	12:01:00	3.4	2	0.113333	30.2099	87.0406	1.5-1.99	30			238.235	0	0	0	0	0	0	0	52.9412	8.82353	0	0	0	0	0	0	0	0	0	0	0	0	0	0	0	0	0	0	0	0	0	0	0
727	SRS	Florida Bays	2008	Pre	20080730	12	12:11:00	3.1	2.06	0.106433	30.2005	87.0398	1.5-1.99	30			1371.75	0	0	0	0	0	0	0	9.39555	0	0	0	0	0	0	0	0	0	0	0	0	18.7911	0	0	0	0	0	0	0	0	0	0	0
728	SRS	Florida Bays	2008	Pre	20080730	13	12:26:00	2.7	2.75	0.12375	30.2089	87.0476	1.5-1.99	28			3183.84	0	0	0	0	0	0	0	202.02	0	0	0	0	0	0	0	0	16.1616	24.2424	0	0	32.3232	0	0	0	0	0	0	0	0	0	0	0
729	Pen	Florida Bays	2008	Pre	20080730	14	13:09:00	3.4	2.33	0.132033	30.2116	87.1162	1.5-1.99	28			1817.72	0	0	0	0	0	0	0	424.135	7.57384	0	0	0	0	0	0	0	0	0	0	0	0	0	0	0	0	0	0	0	0	0	0	0
730	Pen	Florida Bays	2008	Pre	20080730	15	13:20:00	3.3	3	0.165	30.2127	87.1178	1.5-1.99	28			1860.61	0	0	0	0	0	0	0	163.636	0	0	0	0	0	0	0	0	0	0	0	0	6.06061	0	0	0	0	0	0	0	0	0	0	0
731	Pen	Florida Bays	2008	Pre	20080730	16	13:34:00	3.1	3	0.155	30.2129	87.1176	1.5-1.99	28			1470.97	0	0	0	0	0	0	0	38.7097	0	0	0	0	0	0	0	0	0	6.45161	0	0	6.45161	0	0	0	0	0	0	0	0	0	0	0
732	Pen	Florida Bays	2008	Pre	20080730	17	13:45:00	3.4	2	0.113333	30.2133	87.1184	1.5-1.99	28			1341.18	0	0	0	0	0	0	0	105.882	0	0	0	0	0	0	0	0	0	8.82353	0	0	8.82353	0	0	0	0	0	0	0	0	0	0	0
733	Pen	Florida Bays	2008	Pre	20080730	18	13:56:00	3.6	3	0.18	30.2132	87.1184	1.5-1.99	28			505.556	0	0	0	0	0	0	0	11.1111	0	0	0	0	0	0	0	0	0	0	0	0	0	0	0	0	0	0	0	0	0	0	0	0
734	Pen	Florida Bays	2008	Pre	20080730	19	14:08:00	3.5	3	0.175	30.2134	87.1186	1.5-1.99	28			777.143	0	0	0	0	0	0	0	17.1429	0	0	0	0	0	0	0	0	0	0	0	0	5.71429	0	0	0	0	0	0	0	0	0	0	0
735	Pen	Florida Bays	2008	Pre	20080730	20	14:16:00	3.2	3	0.16	30.2134	87.1186	1.5-1.99	28			650	0	0	0	0	0	0	0	0	0	0	0	0	0	0	0	0	0	0	0	0	0	0	0	0	0	0	0	0	0	0	0	0
736	Big Lag	Florida Bays	2008	Pre	20080801	1	10:11:00	3.5	2	0.116667	30.1939	87.1955		32			2682.86	0	0	0	0	0	0	0	25.7143	0	0	0	0	0	0	0	0	0	0	0	0	0	0	0	0	0	0	0	0	0	0	0	0
737	Big Lag	Florida Bays	2008	Pre	20080801	2	10:19:00	2.7	2	0.09	30.1937	87.1956		32			3577.78	0	0	0	0	0	0	0	344.444	0	0	0	0	0	0	0	0	0	0	0	0	0	0	0	0	0	0	0	0	0	0	0	0
738	Big Lag	Florida Bays	2008	Pre	20080801	3	10:29:00	3.4	2	0.113333	30.1927	87.1971		32			961.765	0	0	0	0	0	0	0	132.353	0	0	0	0	0	0	0	0	0	0	0	0	0	0	0	0	0	0	0	0	0	0	0	0
739	Big Lag	Florida Bays	2008	Pre	20080801	4	10:37:00	3.4	2.5	0.141667	30.1922	87.1986		32			1016.47	0	0	0	0	0	0	0	190.588	0	0	0	0	0	0	0	0	0	0	0	0	0	0	0	0	0	0	0	0	0	0	0	0
740	Big Lag	Florida Bays	2008	Pre	20080801	5	10:46:00	2.8	2.5	0.116667	30.1914	87.1914		32			7791.43	0	0	0	0	0	0	0	728.571	0	0	0	0	0	0	0	0	0	0	0	0	0	0	0	0	0	0	0	0	0	0	0	0
741	Big Lag	Florida Bays	2008	Pre	20080801	6	11:06:00	2.4	2.5	0.1	30.1913	87.2		32			6550	0	0	0	0	0	0	0	340	0	0	0	0	0	0	0	0	0	0	0	0	0	0	0	0	0	0	0	0	0	0	0	0
742	Big Lag	Florida Bays	2008	Pre	20080801	7	11:35:00	2.3	2.5	0.0958333	30.1917	87.2004		32			3433.04	0	0	0	0	0	0	0	20.8696	0	0	0	0	0	0	0	0	0	0	0	0	0	0	0	0	0	0	0	0	0	0	0	0
743	B St John	Florida Bays	2008	Pre	20080801	8	12:28:00	2.4	2	0.08	30.1863	87.2884		32		No Grass	175	0	0	0	0	0	0	0	25	0	0	0	0	0	0	0	0	0	0	0	0	0	0	0	0	0	0	0	0	0	0	0	0
744	B St John	Florida Bays	2008	Pre	20080801	9	12:35:00	2.7	2	0.09	30.1859	87.2876		32			300	0	0	0	0	0	11.1111	0	77.7778	0	0	0	0	0	0	0	0	0	0	0	0	0	0	0	0	0	0	0	0	0	0	0	0
745	B St John	Florida Bays	2008	Pre	20080801	10	12:46:00	2.5	2	0.0833333	30.1864	87.2863		32			2844	0	0	0	0	0	0	0	312	0	0	0	0	0	0	0	0	0	0	0	0	0	0	0	0	0	0	0	0	0	0	0	0
746	B St John	Florida Bays	2008	Pre	20080801	11	12:56:00	2.8	2	0.0933333	30.1863	87.2847		32			2175	0	0	0	0	0	0	0	417.857	0	0	0	0	0	0	0	0	0	0	0	0	0	0	0	0	0	0	0	0	0	0	0	0
747	B St John	Florida Bays	2008	Pre	20080801	12	13:07:00	2.8	2	0.0933333	30.1865	87.2839		32			5153.57	0	0	0	0	0	0	0	910.714	0	0	0	0	0	0	0	0	0	0	0	0	10.7143	0	0	0	0	0	0	0	0	0	0	0
748	Mid Bay	Miss Sound	2008	Pre	20080828	1	09:56:00	2.8	2	0.0933333	30.3256	88.4098	1.0-1.49	24	29.9	Refractometer read 5ppt with tap water	2517.86	0	0	0	0	0	0	10.7143	2228.57	0	0	0	0	0	0	0	0	21.4286	0	0	0	96.4286	0	0	0	0	0	0	0	0	0	0	0
749	Mid Bay	Miss Sound	2008	Pre	20080828	2	10:07:00	2.8	2	0.0933333	30.3536	88.41	1.0-1.49	24	29.9	Refractometer read 5ppt with tap water	396.429	0	0	0	0	0	0	0	353.571	0	0	0	0	0	0	0	0	0	0	0	0	0	0	32.1429	0	0	0	0	0	0	0	0	0
750	Mid Bay	Miss Sound	2008	Pre	20080828	3	10:15:00	2.9	2	0.0966667	30.3551	88.4109	1.0-1.49	24	29.9	Refractometer read 5ppt with tap water	186.207	0	0	0	0	0	0	0	186.207	0	0	0	0	0	0	0	0	0	0	0	0	0	0	0	0	0	0	0	0	0	0	0	0
751	Mid Bay	Miss Sound	2008	Pre	20080828	4	10:23:00	3.1	3.5	0.180833	30.3572	88.412	1.0-1.49	24	29.9	Refractometer read 5ppt with tap water	110.599	0	0	0	0	0	0	5.52995	77.4194	0	0	0	0	0	0	0	0	0	0	0	0	11.0599	0	0	0	0	0	0	0	0	0	0	0
752	Mid Bay	Miss Sound	2008	Pre	20080828	5	10:43:00	3.2	2	0.106667	30.3456	88.412	1.0-1.49	24	29.9	Refractometer read 5ppt with tap water	806.25	0	0	0	0	0	0	0	562.5	0	0	0	0	0	0	0	0	0	0	0	0	75	0	0	0	0	0	0	0	0	0	0	0
753	Mid Bay	Miss Sound	2008	Pre	20080828	6	10:52:00	3	3	0.15	30.3446	88.4115	1.0-1.49	25	30	Refractometer read 5ppt with tap water	360	0	0	0	0	0	0	0	300	0	0	0	0	0	0	0	0	0	0	0	0	0	0	0	0	0	0	0	0	0	0	0	0
754	GBS	Miss Sound	2008	Pre	20080828	7	11:17:00	4.2	2	0.14	30.638	88.3706	1.0-1.49	27	29.6	Refractometer read 5ppt with tap water	21.4286	0	0	0	0	0	0	0	7.14286	0	0	0	0	0	0	0	0	0	0	0	0	0	0	0	0	0	0	0	0	0	0	0	0
755	GBS	Miss Sound	2008	Pre	20080828	8	11:25:00	2.7	2	0.09	30.3688	88.3689	1.0-1.49	27	29.6	Refractometer read 5ppt with tap water	33.3333	0	0	0	0	0	0	0	33.3333	0	0	0	0	0	0	0	0	0	0	0	0	0	0	0	0	0	0	0	0	0	0	0	0
756	GBS	Miss Sound	2008	Pre	20080828	9	11:32:00	2.7	2	0.09	30.3697	88.3661	1.0-1.49	27	29.6	Refractometer read 5ppt with tap water	377.778	0	0	0	0	0	0	0	355.556	0	0	0	0	0	0	0	0	0	0	0	0	0	0	11.1111	0	0	0	0	0	0	0	0	0
757	GBS	Miss Sound	2008	Pre	20080828	10	11:40:00	3.3	3	0.165	30.3691	88.3652	1.0-1.49	27	29.6	Refractometer read 5ppt with tap water	1327.27	0	0	0	0	0	0	0	1315.15	0	0	0	0	0	0	0	0	0	6.06061	0	0	0	0	0	0	0	0	0	0	0	0	0	0
758	GBS	Miss Sound	2008	Pre	20080828	11	11:47:00	2.9	3.5	0.169167	30.3687	88.3637	1.0-1.49	27	29.6	Refractometer read 5ppt with tap water	644.335	0	0	0	0	0	0	0	537.931	0	0	0	0	0	0	0	0	11.8227	0	0	0	0	0	5.91133	0	0	0	0	0	0	0	0	0
759	GBS	Miss Sound	2008	Pre	20080828	12	11:59:00	3.7	3	0.185	30.3699	88.3627	1.0-1.49	27	29.6	Refractometer read 5ppt with tap water	1902.7	0	0	0	0	0	0	0	1854.05	0	0	0	0	0	0	0	0	0	0	0	0	5.40541	0	0	0	0	0	0	0	0	0	0	0
760	GBS	Miss Sound	2008	Pre	20080828	13	12:08:00	3	2	0.1	30.368	88.3617	1.0-1.49	27	29.6	Refractometer read 5ppt with tap water	70	0	0	0	0	0	0	0	50	0	0	0	0	0	0	0	0	10	0	0	0	10	0	0	0	0	0	0	0	0	0	0	0
761	PAP	Miss Sound	2008	Pre	20080828	14	12:26:00	2.7	2	0.09	30.3792	88.3113	1.0-1.49	28	38.8	Refractometer read 5ppt with tap water	633.333	0	0	0	0	0	11.1111	11.1111	322.222	0	0	0	0	0	0	0	0	11.1111	0	0	0	44.4444	0	22.2222	0	0	0	0	0	0	0	0	0
762	PAP	Miss Sound	2008	Pre	20080828	15	12:37:00	2.3	3	0.115	30.3787	88.3109	1.0-1.49	28	38.8	Refractometer read 5ppt with tap water	652.174	0	0	0	0	0	0	43.4783	121.739	0	0	0	0	0	0	0	0	26.087	0	0	0	104.348	0	26.087	0	0	0	0	0	0	0	0	0
763	PAP	Miss Sound	2008	Pre	20080828	16	12:53:00	2.2	6	0.22	30.3778	88.3111	1.0-1.49	28	38.8	Refractometer read 5ppt with tap water	940.909	0	0	0	0	0	0	13.6364	377.273	4.54545	0	0	0	0	0	0	0	27.2727	4.54545	0	0	240.909	0	0	0	0	0	0	0	0	0	0	0
764	Ship Is	Gulf Is	2008	Pre	20080829	1	10:12:00	3	3.083	0.15415	30.2457	88.8804		27	29		6.48719	0	0	0	0	0	0	0	0	0	0	0	0	0	0	0	0	0	0	0	0	0	0	0	0	0	0	0	0	0	0	0	0
765	Ship Is	Gulf Is	2008	Pre	20080829	2	10:18:00	4.4	4.583	0.336087	30.2465	88.882		27	29		23.8034	0	0	0	0	0	0	0	2.97542	0	0	0	0	0	0	0	0	0	0	0	0	0	0	0	0	0	0	0	0	0	0	0	0
766	Ship Is	Gulf Is	2008	Pre	20080829	3	10:26:00	3.9	4.75	0.30875	30.2442	88.8825		27	29		68.0162	0	0	0	0	0	0	0	0	0	0	0	0	0	0	0	0	3.23887	0	0	0	0	0	0	0	0	0	0	0	0	0	0	0
767	Ship Is	Gulf Is	2008	Pre	20080829	4	10:50:00	4.5	10	0.75	30.2444	88.8836		27	29	Add 1 pinfish	1.33333	0	0	0	0	0	0	0	0	0	0	0	0	0	0	0	0	0	0	0	0	0	0	0	0	0	0	0	0	0	0	0	0
768	Ship Is	Gulf Is	2008	Pre	20080829	5	11:23:00	4.8	10	0.8	30.2169	88.9504		27	29		13.75	0	0	0	0	0	0	0	0	0	0	0	0	0	0	0	0	0	0	0	0	0	0	0	0	0	0	0	0	0	0	0	0
769	Ship Is	Gulf Is	2008	Pre	20080829	6	11:59:00	3.7	6	0.37	30.2406	88.8885		27	29		262.162	0	0	0	0	0	0	0	8.10811	0	0	0	0	0	0	0	0	0	0	0	0	0	0	0	0	0	0	0	0	0	0	0	0
770	SRS	Florida Bays	2008	Pre	20080905	1	10:27:00	3.4	2	0.113333	30.357	87.3569		28	28		1597.06	0	0	0	0	0	0	0	70.5882	0	0	0	0	0	0	0	0	8.82353	0	0	0	8.82353	0	0	0	0	0	0	0	0	0	0	0
771	SRS	Florida Bays	2008	Pre	20080905	2	10:35:00	3.2	2	0.106667	30.3577	87.1489		28	28		496.875	0	0	0	0	0	0	0	18.75	0	0	0	0	0	0	0	0	0	0	0	0	0	0	0	0	0	0	0	0	0	0	0	0
772	SRS	Florida Bays	2008	Pre	20080905	3	10:43:00	3.5	2	0.116667	30.3585	87.1486		28	28		1542.86	0	0	0	0	0	0	0	265.714	0	0	0	0	0	0	0	0	0	0	0	0	0	0	0	0	0	0	0	0	0	0	0	0
773	SRS	Florida Bays	2008	Pre	20080905	4	10:54:00	3.4	2.25	0.1275	30.358	87.1471		28	28		2384.31	0	0	0	0	0	0	0	180.392	0	0	0	0	0	0	0	0	23.5294	0	0	0	0	0	0	0	0	0	0	0	0	0	0	0
774	SRS	Florida Bays	2008	Pre	20080905	5	11:03:00	3.6	2	0.12	30.359	87.1468		28	28		691.667	0	0	0	8.33333	0	0	0	75	0	0	0	0	0	0	0	0	0	0	0	0	8.33333	0	0	0	0	0	0	0	0	0	0	0
775	SRS	Florida Bays	2008	Pre	20080905	6	11:15:00	3.5	3	0.175	30.3599	87.2004		28	28		1668.57	0	0	0	0	0	0	0	97.1429	177.143	0	0	0	0	0	0	0	5.71429	0	0	0	5.71429	0	0	0	0	0	0	0	0	0	0	0
776	SRS	Florida Bays	2008	Pre	20080905	7	11:44:00	3.7	2	0.123333	30.3535	87.1986		28	28		948.649	0	0	0	0	0	0	0	16.2162	8.10811	0	0	0	0	0	0	0	16.2162	0	0	0	0	0	0	0	0	0	0	0	0	0	0	0
777	SRS	Florida Bays	2008	Pre	20080905	8	11:53:00	3.2	2	0.106667	30.3528	87.1974		30	29		2390.62	0	0	0	0	0	9.375	0	140.625	18.75	0	0	0	0	0	0	0	0	0	0	0	9.375	0	0	0	0	0	0	0	0	0	0	0
778	SRS	Florida Bays	2008	Pre	20080905	9	12:07:00	3.9	3	0.195	30.3503	97.1964		30	29		1379.49	0	0	5.12821	0	0	0	0	200	5.12821	0	0	0	0	0	0	0	0	0	0	0	0	0	0	0	0	0	0	0	0	0	0	0
779	SRS	Florida Bays	2008	Pre	20080905	10	12:16:00	4	3	0.2	30.3504	87.196		30	29		895	0	0	0	0	0	0	0	295	5	0	0	0	0	0	0	0	0	0	0	0	0	0	0	0	0	0	0	0	0	0	0	0
780	Pen	Florida Bays	2008	Pre	20080905	11	12:49:00	4	3	0.2	30.3282	87.1944		30	28.9		280	0	0	0	0	0	0	0	95	0	0	0	0	0	0	0	0	0	5	0	0	0	0	0	0	0	0	0	0	0	0	0	0
781	Pen	Florida Bays	2008	Pre	20080905	12	12:57:00	4.1	2	0.136667	30.3276	97.1957		30	28.9		395.122	0	0	0	0	0	0	0	117.073	0	0	7.31707	0	0	0	0	0	7.31707	0	0	0	0	0	0	0	0	0	0	0	0	0	0	0
782	Pen	Florida Bays	2008	Pre	20080905	13	13:12:00	3.8	3	0.19	30.3242	87.2325		30	28.9		368.421	0	0	0	0	0	0	0	105.263	0	0	0	0	0	0	0	0	5.26316	0	0	0	0	0	0	0	0	0	0	0	0	0	0	0
783	Pen	Florida Bays	2008	Pre	20080905	14	13:28:00	4	3	0.2	30.3598	87.2036		30	28.9		280	0	0	0	0	0	0	0	115	0	0	0	0	0	0	0	0	0	5	0	0	0	0	0	0	0	0	0	0	0	0	0	0
784	Pen	Florida Bays	2008	Pre	20080905	15	13:36:00	3.3	3	0.165	30.3959	87.2028		30	28.9		139.394	0	0	0	0	0	0	0	6.06061	0	0	0	0	0	0	0	0	0	0	0	0	0	0	0	0	0	0	0	0	0	0	0	0
785	Pen	Florida Bays	2008	Pre	20080905	16	13:45:00	4.1	4	0.273333	30.3577	87.2004		28	30.1		102.439	0	0	0	0	0	0	0	21.9512	0	0	0	0	0	0	0	0	0	0	0	0	0	0	0	0	0	0	0	0	0	0	0	0
786	Pen	Florida Bays	2008	Pre	20080905	17	13:54:00	3.5	6	0.35	30.3557	87.1986		28	30.1		460	0	0	0	0	0	0	0	125.714	0	0	0	0	0	0	0	0	0	0	0	0	0	0	0	0	0	0	0	0	0	0	0	0
787	Pen	Florida Bays	2008	Pre	20080905	18	14:09:00	3.8	5	0.316667	30.3554	87.1974		28	30.1		789.474	0	0	0	0	0	0	0	407.368	0	0	0	0	0	0	0	0	0	3.15789	0	0	0	0	0	0	0	0	0	0	0	0	0	0
788	Pen	Florida Bays	2008	Pre	20080905	19	14:20:00	3.1	1.75	0.0904167	30.3547	87.1964		28	30.1		320.737	0	0	0	0	0	0	0	33.1797	0	0	0	0	0	0	0	0	0	0	0	0	0	0	0	0	0	0	0	0	0	0	0	0
789	Pen	Florida Bays	2008	Pre	20080905	20	14:28:00	3.3	9	0.495	30.3541	87.196		28	30.1		420.202	0	0	0	0	0	0	0	38.3838	0	0	0	0	0	0	0	0	2.0202	0	0	0	0	0	0	0	0	0	0	0	0	0	0	0
802	Choc	Florida Bays	2008	Pre	20080914	1	12:19:00	3.5	2	0.116667	30.4002	86.5224		25	30.1		94.2857	0	0	0	0	0	0	0	0	0	0	0	0	0	0	0	0	0	0	0	0	0	0	0	0	0	0	0	0	0	0	0	0
803	Choc	Florida Bays	2008	Pre	20080914	2	12:30:00	3.8	2	0.126667	30.9614	86.5256		25	30.1		694.737	0	0	0	0	0	0	0	0	0	0	0	0	0	0	0	0	0	0	0	0	0	0	0	0	0	0	0	0	0	0	0	0
804	Choc	Florida Bays	2008	Pre	20080914	3	12:36:00	3.2	2	0.106667	30.3971	86.5245		25	30.1		581.25	0	0	0	0	0	0	0	0	0	0	0	0	0	0	0	0	0	0	0	0	0	0	0	0	0	0	0	0	0	0	0	0
805	Choc	Florida Bays	2008	Pre	20080914	4	12:43:00	3.6	2	0.12	30.3973	86.6236		25	30.1		483.333	0	0	0	0	0	0	0	0	0	0	0	0	0	0	0	0	0	0	0	0	0	0	0	0	0	0	0	0	0	0	0	0
806	Choc	Florida Bays	2008	Pre	20080914	5	12:50:00	3.7	2	0.123333	30.398	86.5224		25	30.1		656.757	0	0	0	0	0	0	8.10811	0	0	0	0	0	0	0	0	0	0	0	0	0	0	0	0	0	0	0	0	0	0	0	0	0
807	Choc	Florida Bays	2008	Pre	20080914	6	12:59:00	4.1	2	0.136667	30.3955	86.5243		25	30.3		336.585	0	0	0	0	0	0	0	0	0	0	0	0	0	0	0	0	7.31707	0	0	0	0	0	0	0	0	0	0	0	0	0	0	0
808	Choc	Florida Bays	2008	Pre	20080914	7	13:09:00	3.8	2	0.126667	30.3963	86.5233		25	30.3		568.421	0	0	0	0	0	0	15.7895	0	0	0	0	0	0	0	0	0	0	0	0	0	0	0	0	0	0	0	0	0	0	0	0	0
809	Choc	Florida Bays	2008	Pre	20080914	8	13:20:00	3.9	2	0.13	30.3953	86.5258		25	30.3		184.615	0	0	0	0	0	0	0	0	0	0	0	0	0	0	0	0	0	0	0	0	0	0	0	0	0	0	0	0	0	0	0	0
810	Choc	Florida Bays	2008	Pre	20080914	9	13:27:00	4	2	0.133333	30.3967	86.525		25	30.3		112.5	0	0	0	0	0	0	0	0	0	0	0	0	0	0	0	0	0	0	0	0	0	0	0	0	0	0	0	0	0	0	0	0
811	Choc	Florida Bays	2008	Pre	20080914	10	13:32:00	3.1	2	0.103333	30.3978	86.5234		25	30.3		222.581	0	0	0	0	0	0	0	0	0	0	0	0	0	0	0	0	9.67742	0	0	0	0	0	0	0	0	0	0	0	0	0	0	0
812	Choc	Florida Bays	2008	Pre	20080914	11	13:41:00	3.4	2	0.113333	30.3983	86.5237		30.3	30.2		847.059	0	0	0	0	0	0	8.82353	0	0	0	0	0	0	0	0	0	8.82353	0	0	0	0	0	0	0	0	0	0	0	0	0	0	0
813	Choc	Florida Bays	2008	Pre	20080914	12	13:50:00	3.6	2	0.12	30.3989	86.5233		30.3	30.2		183.333	0	0	0	0	0	0	0	0	0	0	0	0	0	0	0	0	0	0	0	0	0	0	0	0	0	0	0	0	0	0	0	0
814	Choc	Florida Bays	2008	Pre	20080914	13	13:56:00	3.6	2	0.12	30.3994	86.5224		30.3	30.2		83.3333	0	0	0	0	0	0	0	0	0	0	0	0	0	0	0	0	0	0	0	0	0	0	0	0	0	0	0	0	0	0	0	0
815	Choc	Florida Bays	2008	Pre	20080914	14	14:15:00	3.4	10	0.566667	30.3951	86.5267		30.3	30.2		472.941	0	0	0	0	0	0	1.76471	0	0	0	0	0	0	0	0	0	0	0	0	0	0	0	0	0	0	1.76471	0	0	0	0	0	0
816	Choc	Florida Bays	2008	Pre	20080914	15	14:33:00	3.4	10	0.566667	30.3957	86.5266		30.3	30.2		333.529	0	0	0	0	0	0	0	0	0	0	0	0	0	0	0	0	0	0	0	0	0	0	0	0	0	0	0	0	0	0	0	0
817	Choc	Florida Bays	2008	Pre	20080914	16	14:51:00	3	10	0.5	30.3954	86.5279		34	30.3		1034	0	0	0	0	0	0	2	0	0	0	0	0	0	0	0	0	0	0	0	0	0	0	0	0	0	0	0	0	0	0	0	0
818	Choc	Florida Bays	2008	Pre	20080914	17	15:17:00	3.4	10.63	0.602367	30.3943	86.5234		34	30.3		270.599	0	0	0	0	0	0	0	0	0	0	0	0	0	0	0	0	0	0	0	0	0	0	0	0	0	0	0	0	0	0	0	0
819	Choc	Florida Bays	2008	Pre	20080914	18	15:35:00	3.7	10	0.616667	30.399	86.5219		34	30.3		42.1622	0	0	0	0	0	0	0	0	0	0	0	0	0	0	0	0	0	0	0	0	0	0	0	0	0	0	0	0	0	0	0	0
820	Choc	Florida Bays	2008	Pre	20080914	19	15:54:00	3.6	10.08	0.6048	30.3997	86.5352		34	30.3		211.64	0	0	0	0	0	0	0	4.96032	0	0	0	0	0	0	0	0	0	0	0	0	0	0	0	0	0	1.65344	0	0	0	0	0	0
821	Choc	Florida Bays	2008	Pre	20080914	20	16:14:00	3.7	10.25	0.632083	30.4002	86.5296		34	30.3		145.55	0	0	0	0	0	0	0	1.58207	0	0	0	0	0	0	0	0	0	0	0	0	0	0	0	0	0	0	0	0	0	0	0	0
822	SAS	Florida Bays	2008	Pre	20080915	1	09:53:00	3	2	0.1	30.1206	85.7129	1.5-1.99	30	29.6		1170	0	0	0	0	0	0	0	0	0	0	0	0	0	0	0	0	0	0	0	0	0	0	0	0	0	0	0	0	0	0	0	0
823	SAS	Florida Bays	2008	Pre	20080915	2	10:03:00	3.2	2	0.106667	30.1201	85.712	1.5-1.99	30	29.6		2118.75	0	0	0	0	0	0	0	0	0	0	0	0	0	0	0	0	0	0	0	0	0	0	0	0	0	0	9.375	0	0	0	0	0
824	SAS	Florida Bays	2008	Pre	20080915	3	10:10:00	3.3	2	0.11	30.1195	85.7111	1.5-1.99	30	29.6		1554.55	0	0	0	0	0	0	0	0	0	0	0	0	0	0	0	0	18.1818	0	0	0	0	0	0	0	0	0	0	0	0	0	0	0
825	SAS	Florida Bays	2008	Pre	20080915	4	10:18:00	2.7	2	0.09	30.1187	85.7098	1.5-1.99	30	29.6		1388.89	0	0	0	0	0	0	0	0	0	0	0	0	0	0	0	0	0	0	0	0	0	0	0	0	0	0	0	0	0	0	0	0
826	SAS	Florida Bays	2008	Pre	20080915	5	10:25:00	3	2	0.1	30.1185	85.7093	1.5-1.99	30	29.6		1200	0	0	0	0	0	0	0	0	0	0	0	0	0	0	0	0	0	0	0	0	0	0	0	0	0	0	0	0	0	0	0	0
827	SAS	Florida Bays	2008	Pre	20080915	6	10:37:00	3.3	2	0.11	30.1074	85.7059	1.5-1.99	30	29.9		2127.27	0	0	0	0	0	0	0	81.8182	0	0	0	0	0	0	0	0	0	0	0	0	0	0	0	0	0	0	0	0	0	0	0	0
828	SAS	Florida Bays	2008	Pre	20080915	7	10:47:00	3.5	2	0.116667	30.1069	85.7049	1.5-1.99	30	29.9		240	0	0	0	0	0	0	0	0	0	0	0	0	0	0	0	0	0	0	0	0	0	0	0	0	0	0	0	0	0	0	0	0
829	SAS	Florida Bays	2008	Pre	20080915	8	10:53:00	3.5	2	0.116667	30.1066	85.7041	1.5-1.99	30	29.9		2922.86	0	0	0	0	0	0	0	8.57143	0	0	0	0	0	0	0	0	25.7143	0	0	0	8.57143	0	0	0	0	0	0	0	0	0	0	0
830	SAS	Florida Bays	2008	Pre	20080915	9	11:06:00	3.4	2	0.113333	30.1061	85.7029	1.5-1.99	30	29.9		679.412	0	0	0	0	0	0	0	8.82353	0	0	0	0	0	0	0	0	0	0	0	0	0	0	0	0	0	0	0	0	0	0	0	0
831	SAS	Florida Bays	2008	Pre	20080915	10	11:14:00	3.7	2	0.123333	30.1049	85.7025	1.5-1.99	30	29.9		1200	0	0	0	0	0	0	0	24.3243	0	0	0	0	0	0	0	0	0	0	0	0	0	0	0	0	0	0	0	0	0	0	0	0
832	SAS	Florida Bays	2008	Pre	20080915	11	11:27:00	3.3	10	0.55	30.1138	85.7074	1.5-1.99	31	30.3		1243.64	0	0	0	0	0	0	0	0	0	0	0	0	0	0	1.81818	3.63636	0	0	0	0	0	0	0	0	0	0	0	0	0	0	0	0
833	SAS	Florida Bays	2008	Pre	20080915	12	11:43:00	3.7	10	0.616667	30.114	85.7074	1.5-1.99	31	30.3		136.216	0	0	0	0	0	0	0	4.86486	0	0	0	0	0	0	0	0	0	0	0	0	0	0	0	0	0	0	0	0	0	0	0	0
834	SAS	Florida Bays	2008	Pre	20080915	13	12:03:00	4	10	0.666667	30.1032	85.6935	1.5-1.99	31	30.3		303	0	0	0	0	0	0	0	10.5	0	0	0	0	0	0	0	0	0	0	0	0	0	0	0	0	0	0	0	0	0	0	0	0
835	SAS	Florida Bays	2008	Pre	20080915	14	12:19:00	3.1	10	0.516667	30.1	85.6908	1.5-1.99	31	30.3		2181.29	0	0	0	0	0	0	0	17.4194	0	0	0	0	0	0	0	0	27.0968	0	0	0	0	0	0	0	0	0	0	0	0	0	0	0
836	SAS	Florida Bays	2008	Pre	20080915	15	13:16:00	3.5	2	0.116667	30.1088	85.6711	1.5-1.99	31	30.3		102.857	0	0	0	0	0	0	0	17.1429	0	0	0	0	0	0	0	0	0	0	0	0	0	0	0	0	0	0	0	0	0	0	0	0
837	SAS	Florida Bays	2008	Pre	20080915	16	13:25:00	3.6	2	0.12	30.112	85.6799	1.5-1.99	30	30.4		4483.33	0	0	0	0	0	0	0	0	0	0	0	0	8.33333	0	0	0	25	0	0	0	0	0	0	0	0	0	8.33333	0	0	0	0	0
838	SAS	Florida Bays	2008	Pre	20080915	17	13:44:00	4	2	0.133333	30.1254	85.6866	1.5-1.99	30	30.4		1200	0	0	0	0	0	0	0	0	0	0	0	0	0	0	0	0	0	0	0	0	0	0	0	0	0	0	0	0	0	0	0	0
839	SAS	Florida Bays	2008	Pre	20080915	18	13:50:00	3	2	0.1	30.1278	85.6852	1.5-1.99	30	30.4		2710	0	0	0	0	0	0	0	10	0	0	0	0	0	0	0	0	20	0	0	0	30	0	0	0	0	0	0	0	0	0	0	0
840	SAS	Florida Bays	2008	Pre	20080915	19	13:58:00	3.2	3	0.16	30.1287	85.684	1.5-1.99	30	30.4		2656.25	0	0	0	0	0	0	0	0	0	0	0	0	6.25	0	0	0	12.5	0	0	0	0	0	0	0	0	0	6.25	0	0	0	0	0
841	SAS	Florida Bays	2008	Pre	20080915	20	14:07:00	3	2.5	0.125	30.1306	85.6817	1.5-1.99	30	30.4		3192	0	8	0	0	0	0	0	0	0	0	0	0	0	0	0	0	8	0	0	0	0	0	0	0	0	0	0	0	0	8	0	0
842	SAS	Florida Bays	2008	Pre	20080915	21	14:21:00	3.2	10	0.533333	30.1335	85.6782	1.5-1.99	31	30.5		1805.62	0	0	0	0	0	0	0	11.25	0	0	0	0	0	0	0	0	0	0	0	0	0	0	0	0	0	0	0	0	0	0	0	0
843	SAS	Florida Bays	2008	Pre	20080915	22	14:37:00	3.4	10	0.566667	30.1381	85.6756	1.5-1.99	31	30.5		114.706	0	0	0	0	0	0	0	0	0	0	0	0	0	0	0	0	0	0	0	0	0	0	0	0	0	0	0	0	0	0	0	0
844	SAS	Florida Bays	2008	Pre	20080915	23	15:02:00	3.1	10	0.516667	30.1133	85.6805	1.5-1.99	31	30.5		1457.42	0	0	0	0	0	0	0	50.3226	0	0	0	0	0	0	0	0	7.74194	0	0	0	0	0	0	0	0	0	0	0	0	0	0	0
845	SAS	Florida Bays	2008	Pre	20080915	24	15:39:00	3	5	0.25	30.1628	85.7341	1.5-1.99	31	30.5		1100	0	0	0	0	0	0	0	60	0	0	0	0	0	0	0	0	0	0	0	0	0	0	0	0	0	0	4	0	0	0	0	0
846	SAS	Florida Bays	2008	Pre	20080915	25	15:07:00	3.2	5	0.266667	30.1638	85.7334	1.5-1.99	31	30.5		746.25	0	0	0	0	0	0	0	0	0	0	0	0	0	0	0	0	7.5	0	0	0	0	0	0	0	0	0	0	0	0	0	0	0
847	SAS	Florida Bays	2008	Pre	20080915	26	16:15:00	3.4	2	0.113333	30.1874	85.7335	1.5-1.99	29	30.8		652.941	0	0	0	0	0	0	0	35.2941	0	0	0	0	0	0	0	0	8.82353	0	0	0	8.82353	0	0	0	0	0	0	0	0	0	0	0
848	SAS	Florida Bays	2008	Pre	20080915	27	16:21:00	3.6	2	0.12	30.1876	85.7334	1.5-1.99	29	30.8		633.333	0	0	0	0	0	0	0	41.6667	0	0	0	0	0	0	0	0	0	0	0	0	0	0	0	0	0	0	0	0	0	0	0	0
849	SAS	Florida Bays	2008	Pre	20080915	28	16:28:00	3.3	2	0.11	30.1874	85.7321	1.5-1.99	29	30.8		1163.64	0	0	0	0	0	0	0	81.8182	0	0	0	0	0	0	0	0	0	0	0	0	9.09091	0	0	0	0	0	0	0	0	0	0	0
850	PSJ	Florida Bays	2008	Pre	20080916	1	08:21:00	3.4	11.5	0.651667	29.8178	85.4027	1.5-1.99	32	28.4		626.087	0	0	0	0	0	0	0	12.2762	0	0	0	0	0	0	0	1.53453	21.4834	0	0	0	0	0	0	0	0	0	0	0	0	0	0	0
851	PSJ	Florida Bays	2008	Pre	20080916	2	08:42:00	2.9	10.75	0.519583	29.8137	85.4049	1.0-1.49	32	28.4		354.13	0	0	0	0	0	0	0	0	0	0	0	0	0	0	0	0	9.6231	0	0	0	0	0	0	0	0	0	0	0	0	0	0	0
852	PSJ	Florida Bays	2008	Pre	20080916	3	09:09:00	4.1	11	0.751667	29.7845	85.3968	1.0-1.49	32	28.4		1009.76	0	0	1.33038	0	0	0	0	1.33038	0	0	0	0	0	0	0	0	17.2949	0	0	0	0	0	0	0	0	0	0	0	0	0	0	0
853	PSJ	Florida Bays	2008	Pre	20080916	4	09:41:00	4.1	9.5	0.649167	29.7249	85.3772	1.0-1.49	32	28.4		3036.2	0	0	0	0	0	0	0	4.62131	0	0	0	0	0	0	0	0	27.7279	0	0	0	0	0	0	0	0	0	0	0	0	0	0	0
854	PSJ	Florida Bays	2008	Pre	20080916	5	10:19:00	3.6	10	0.6	29.7152	85.3724	1.5-1.99	32	28.4		2461.67	0	0	0	0	0	0	0	13.3333	0	0	0	0	0	0	0	0	25	0	0	1.66667	1.66667	0	0	0	0	0	0	0	0	0	0	0
855	PSJ	Florida Bays	2008	Pre	20080916	6	10:54:00	3.1	2	0.103333	29.7265	85.3352	1.5-1.99	35	30		812.903	0	0	0	0	0	0	0	0	0	0	0	0	0	0	0	0	29.0323	0	0	0	0	0	0	0	0	0	0	0	0	0	0	0
856	PSJ	Florida Bays	2008	Pre	20080916	7	11:02:00	3.4	2	0.113333	29.7266	85.3341	1.5-1.99	35	30		1535.29	0	0	8.82353	0	0	0	0	17.6471	0	0	0	0	0	0	0	0	0	0	0	0	0	0	0	0	0	0	0	0	0	0	0	0
857	PSJ	Florida Bays	2008	Pre	20080916	8	11:16:00	3.3	3	0.165	29.7331	85.3303	1.5-1.99	35	30		878.788	0	0	0	0	0	0	0	0	0	0	0	0	0	0	0	0	60.6061	0	0	0	0	0	0	0	0	0	0	0	0	0	0	0
858	PSJ	Florida Bays	2008	Pre	20080916	9	11:31:00	3.7	2	0.123333	29.7597	85.3119	1.5-1.99	33	30.1		713.514	0	0	16.2162	8.10811	0	0	0	16.2162	0	0	0	0	0	0	0	0	24.3243	0	0	0	0	0	0	0	0	0	0	0	0	0	0	0
859	PSJ	Florida Bays	2008	Pre	20080916	10	11:41:00	3.9	3	0.195	29.7602	85.3107	1.5-1.99	33	30.1		2974.36	0	0	0	0	0	0	0	10.2564	0	0	0	0	0	0	0	0	15.3846	0	0	0	0	5.12821	0	0	0	0	0	0	0	0	0	0
860	PSJ	Florida Bays	2008	Pre	20080916	11	11:49:00	2.9	2	0.0966667	29.7621	85.31	1.5-1.99	33	30.1		817.241	0	0	0	0	0	0	0	0	0	0	0	0	0	0	0	0	20.6897	0	0	0	0	0	0	0	0	0	0	0	0	0	0	0
861	PSJ	Florida Bays	2008	Pre	20080916	12	12:10:00	3.6	10	0.6	29.7634	85.3103	1.5-1.99	33	30.1		1140	0	0	0	0	0	0	0	48.3333	0	0	0	0	0	0	0	0	15	0	0	0	0	0	0	0	0	0	0	0	0	0	0	0
862	PSJ	Florida Bays	2008	Pre	20080916	13	12:34:00	3.3	10	0.55	29.7677	85.3091	1.5-1.99	33	30.1		2032.73	0	0	0	0	0	0	0	49.0909	0	0	0	0	1.81818	0	0	0	41.8182	0	0	0	0	0	0	0	0	0	0	0	0	0	0	0
863	PSJ	Florida Bays	2008	Pre	20080916	14	13:09:00	3.2	7.5	0.4	29.7718	85.3085	1.5-1.99	33	30.1		3742.5	0	0	2.5	2.5	0	0	0	95	0	0	0	0	0	0	0	0	45	0	0	0	0	0	0	0	0	0	0	0	0	2.5	0	0
864	PSJ	Florida Bays	2008	Pre	20080916	15	13:48:00	2.9	10	0.483333	29.7749	85.3307	1.5-1.99	33	30.1		2753.79	0	0	2.06897	2.06897	0	0	0	6.2069	0	0	0	0	0	0	0	0	18.6207	0	0	0	0	0	0	0	0	0	0	0	0	2.06897	0	0
901	PB Is	Gulf Is	2008	Pre	20080922	1	09:08:00	3.6	7	0.42	30.2086	88.4257				Add 1 pinfish	2.38095	0	0	0	0	0	0	0	0	0	0	0	0	0	0	0	0	0	0	0	0	0	0	0	0	0	0	0	0	0	0	0	0
902	PB Is	Gulf Is	2008	Pre	20080922	2	09:28:00	3.3	10	0.55	30.2088	88.4321				Add 1 pinfish	1.81818	0	0	0	0	0	0	0	0	0	0	0	0	0	0	0	0	0	0	0	0	0	0	0	0	0	0	0	0	0	0	0	0
903	PB Is	Gulf Is	2008	Pre	20080922	3	09:48:00	4.6	20	1.53333	30.209	88.4212				Add 1 pinfish	0.652174	0	0	0	0	0	0	0	0	0	0	0	0	0	0	0	0	0	0	0	0	0	0	0	0	0	0	0	0	0	0	0	0
904	PB Is	Gulf Is	2008	Pre	20080922	4	10:20:00	4.4	28	2.05333	30.2087	88.4233				Add 1 pinfish	0.487013	0	0	0	0	0	0	0	0	0	0	0	0	0	0	0	0	0	0	0	0	0	0	0	0	0	0	0	0	0	0	0	0
905	PB Is	Gulf Is	2008	Pre	20081016	1	10:10:00	3.8	10	0.633333	30.211	88.4184		32	25.6		41.0526	0	0	0	0	0	0	0	0	0	0	0	0	0	0	0	0	1.57895	0	0	0	0	0	0	0	0	0	0	0	0	0	0	0
906	PB Is	Gulf Is	2008	Pre	20081016	2	10:25:00	3.4	12	0.68	30.212	88.4227		32	25.6		69.1176	0	0	0	0	0	0	1.47059	7.35294	0	0	0	0	0	0	0	0	1.47059	0	0	0	0	0	0	0	0	0	0	0	0	0	0	0
907	PB Is	Gulf Is	2008	Pre	20081016	3	10:46:00	3.6	10	0.6	30.2108	88.4246		32	25.6		15	0	0	0	0	0	0	1.66667	1.66667	0	0	0	0	0	0	0	0	0	0	0	0	0	0	0	0	0	0	0	0	0	0	0	0
908	PB Is	Gulf Is	2008	Pre	20081016	4	11:05:00	3.5	10	0.583333	30.2115	88.4291		32	25.6		48	0	0	0	0	0	0	0	1.71429	0	0	0	0	0	0	0	0	1.71429	0	0	0	0	0	0	0	0	0	0	0	0	0	0	0
909	PB Is	Gulf Is	2008	Pre	20081016	5	11:22:00	3.7	15	0.925	30.2082	88.4332		32	25.6		60.5405	0	0	0	0	0	0	1.08108	11.8919	0	0	0	0	0	0	0	0	6.48649	0	0	0	0	0	0	0	0	0	0	0	0	0	0	0
910	DI	Gulf Is	2008	Pre	20081016	6	12:19:00	4	15	1	30.2315	88.3023		32	25.6		3	0	0	0	0	0	0	0	0	0	0	0	0	0	0	0	0	0	0	0	0	0	0	0	0	0	0	0	0	0	0	0	0
911	DI	Gulf Is	2008	Pre	20081016	7	12:39:00	3.8	15	0.95	30.2333	88.295		32	25.6		2.10526	0	0	0	0	0	0	0	1.05263	0	0	0	0	0	0	0	0	0	0	0	0	0	0	0	0	0	0	0	0	0	0	0	0
912	DI	Gulf Is	2008	Pre	20081016	8	13:05:00	3.2	10	0.533333	30.2357	88.2801		32	25.6		9.375	0	0	0	0	0	0	0	0	0	0	0	0	0	0	0	0	0	0	0	0	0	0	0	0	0	0	0	0	0	0	0	0
913	DI	Gulf Is	2008	Pre	20081016	9	13:21:00	3.6	24	1.44	30.2366	88.2738		32	25.6		2.08333	0	0	0	0	0	0	0	0.694444	0	0	0	0	0	0	0	0	0	0.694444	0	0	0	0	0	0	0	0	0	0	0	0	0	0
914	Choc	Florida Bays	2008	Pre	20081009	1	10:01:00	2.4	10	0.4	30.3945	86.5254		27	25		1097.5	0	0	0	0	0	0	0	0	0	0	0	0	0	0	0	0	0	0	0	0	0	0	0	0	0	0	0	0	0	0	0	0
915	Choc	Florida Bays	2008	Pre	20081009	2	10:18:00	3.9	10	0.65	30.3999	86.5247		27	25		2743.08	0	0	0	0	0	0	0	0	0	0	0	0	0	0	0	0	0	0	0	0	0	0	0	0	0	0	0	0	0	0	0	0
916	Choc	Florida Bays	2008	Pre	20081009	3	10:33:00	3.5	10	0.583333	30.3952	86.5272		27	25		121.714	0	0	0	0	0	0	0	0	0	0	0	0	0	0	0	0	0	0	0	0	0	0	0	0	0	0	0	0	0	0	0	0
917	Choc	Florida Bays	2008	Pre	20081009	4	10:49:00	3.8	10	0.633333	30.3995	86.5265		27	25		75.7895	0	0	0	0	0	0	0	0	0	0	0	0	0	0	0	0	0	0	0	0	0	0	0	0	0	0	0	0	0	0	0	0
918	Choc	Florida Bays	2008	Pre	20081009	5	11:03:00	3.5	10	0.583333	30.4002	86.5279		27	25		468	0	0	0	0	0	0	0	0	0	0	0	0	0	0	0	0	0	0	0	0	0	0	0	0	0	0	0	0	0	0	0	0
919	Choc	Florida Bays	2008	Pre	20081009	6	11:17:00	3.8	10	0.633333	30.3974	86.5298		27	25		528.947	0	0	0	0	0	0	1.57895	4.73684	0	0	0	0	0	0	0	0	1.57895	0	0	0	0	0	0	0	0	0	0	0	0	0	0	0
934	Mid Bay	Miss Sound	2008	Pre	20081014	1	11:05:00	3.2	2	0.106667	30.3533	88.4048		25.7	31		75	0	0	0	0	0	0	0	0	0	0	0	0	0	0	0	0	0	0	0	0	18.75	0	0	0	0	0	0	0	0	0	0	0
935	Mid Bay	Miss Sound	2008	Pre	20081014	2	11:16:00	3	2.5	0.125	30.3539	88.41		25.7	31		280	0	0	0	0	0	0	0	72	0	0	0	0	0	0	0	0	0	0	0	0	88	0	0	0	0	0	0	0	0	0	0	0
936	Mid Bay	Miss Sound	2008	Pre	20081014	3	11:24:00	3	3	0.15	30.354	88.41		25.7	31		280	0	0	0	0	0	0	0	193.333	0	0	0	0	0	0	0	0	6.66667	0	0	0	20	0	0	0	0	0	0	0	0	0	0	0
937	Mid Bay	Miss Sound	2008	Pre	20081014	4	11:34:00	2.7	3	0.135	30.3548	88.4105		25.7	31		162.963	0	0	0	0	0	0	0	111.111	0	0	0	0	0	0	0	0	0	0	0	7.40741	22.2222	0	7.40741	0	0	0	0	0	0	0	0	0
938	Mid Bay	Miss Sound	2008	Pre	20081014	5	11:44:00	3	3	0.15	30.3559	88.411		25.7	31		720	0	0	0	0	0	0	6.66667	580	0	0	0	0	0	6.66667	0	0	0	0	0	0	60	0	0	0	0	0	0	0	0	0	0	0
939	Mid Bay	Miss Sound	2008	Pre	20081014	6	11:58:00	3	3	0.15	30.3571	88.4117		25.7	31		40	0	0	0	0	0	0	0	20	0	0	0	0	0	0	0	0	0	0	0	13.3333	0	0	6.66667	0	0	0	0	0	0	0	0	0
940	Mid Bay	Miss Sound	2008	Pre	20081014	7	12:28:00	3.4	3	0.17	30.3701	88.3621		25.7	31		23.5294	0	0	0	0	0	0	0	0	0	0	0	0	0	0	0	0	0	0	0	0	0	0	0	0	0	0	0	0	0	0	0	0
941	Mid Bay	Miss Sound	2008	Pre	20081014	8	12:36:00	3.9	3	0.195	30.3699	88.3634		25.7	31		25.641	0	0	0	0	0	0	0	0	0	0	0	0	0	0	0	0	0	0	0	0	0	0	0	0	0	0	0	0	0	0	0	0
942	PAP	Miss Sound	2008	Pre	20081014	9	12:56:00	3.2	4	0.213333	30.3841	88.3146		25.7	31		215.625	0	0	0	0	0	0	0	65.625	4.6875	0	0	0	0	0	0	0	0	9.375	0	0	28.125	0	0	0	0	0	0	0	0	0	0	0
943	Big Lag	Florida Bays	2008	Pre	20081015	1	11:04:00	3.8	5	0.316667	30.3188	87.3332		32	26.3		1787.37	0	0	0	0	0	0	0	0	0	0	0	0	0	0	0	0	0	0	0	0	3.15789	0	0	0	0	0	0	0	0	0	0	0
944	Big Lag	Florida Bays	2008	Pre	20081015	2	11:17:00	3.5	5	0.291667	30.3184	87.335		32	26.3		99.4286	0	0	0	0	0	0	0	0	0	0	0	0	0	0	0	0	0	0	0	0	0	0	0	0	0	0	0	0	0	0	0	0
945	Big Lag	Florida Bays	2008	Pre	20081015	3	11:42:00	3.5	5	0.291667	30.3176	87.3386		32	26.3		1145.14	0	0	0	0	0	0	0	0	0	0	0	0	0	0	0	0	3.42857	0	0	0	0	0	0	0	0	0	0	0	0	0	0	0
946	Ship Is	Gulf Is	2008	Pre	20081017	1	10:02:00	3.7	10	0.616667	30.2449	88.883	<1.0	31	26		126.486	0	0	0	0	0	0	0	32.4324	0	0	0	0	0	0	0	0	1.62162	0	0	0	1.62162	0	3.24324	0	0	0	0	0	0	0	0	0
947	Ship Is	Gulf Is	2008	Pre	20081017	2	10:24:00	3.7	10	0.616667	30.2441	88.8831	<1.0	31	26		207.568	0	0	0	0	0	0	0	27.5676	0	0	0	0	0	0	0	0	3.24324	0	0	0	0	0	3.24324	0	0	0	0	0	0	0	0	0
948	Ship Is	Gulf Is	2008	Pre	20081017	3	10:46:00	3.7	10	0.616667	30.2432	88.8866	<1.0	31	26		178.378	0	0	0	0	0	0	0	12.973	0	0	0	0	0	0	0	0	6.48649	0	0	1.62162	1.62162	0	6.48649	0	0	0	0	0	0	0	0	0
949	Ship Is	Gulf Is	2008	Pre	20081017	4	11:07:00	4	10	0.666667	30.2448	88.8832	<1.0	31	26		22.5	0	0	0	0	0	0	0	4.5	0	0	0	0	0	0	0	0	0	0	0	0	0	0	0	0	0	0	0	0	0	0	0	0
950	Ship Is	Gulf Is	2008	Pre	20081017	5	11:22:00	3.6	25	1.5	30.2432	88.8869	<1.0	31	26		85.3333	0	0	0	0	0	0	0	5.33333	0	0	0	0	0	0	0	0	1.33333	0	0	0	0	0	0	0	0	0	0	0	0	0	0	0
951	Horn Is	Gulf Is	2008	Pre	20081017	6	12:32:00	4	20	1.33333	30.2439	88.7671	<1.0	34	26.9		108	0	0	0	0	0	0.75	0	16.5	0	0	0	0	0	0	0	0	4.5	0	0	0	0	0	0	0	0	0	0	0	0	0	0	0
952	Horn Is	Gulf Is	2008	Pre	20081017	7	13:04:00	3.3	11	0.605	30.2454	88.7566	<1.0	34	26.9		152.066	0	0	0	0	0	1.65289	0	19.8347	0	0	0	0	0	0	0	0	8.26446	0	0	0	1.65289	0	0	0	0	0	0	0	0	0	0	0
953	Horn Is	Gulf Is	2008	Pre	20081017	8	12:28:00	3.1	5	0.258333	30.2474	88.7517	<1.0	34	26.9		135.484	0	0	0	0	0	0	0	19.3548	0	0	0	0	0	0	0	0	0	0	0	0	0	0	0	0	0	0	0	0	0	0	0	0
954	Horn Is	Gulf Is	2008	Pre	20081017	9	13:42:00	3.3	13	0.715	30.2479	88.7492	<1.0	34	26.9		85.3147	0	0	0	0	0	0	0	9.79021	0	0	0	0	0	0	0	0	2.7972	0	0	0	0	0	0	0	0	0	0	0	0	0	0	0
955	B St John	Florida Bays	2008	Pre	20081022	1	10:04:00	2.8	3	0.14	30.3092	87.4811		30	23.7		864.286	0	0	0	0	0	7.14286	0	71.4286	0	0	0	0	0	0	0	0	0	0	0	0	0	0	0	0	0	0	0	0	0	0	0	0
956	B St John	Florida Bays	2008	Pre	20081022	2	10:26:00	3.6	5	0.3	30.3097	87.4787		30	23.7		123.333	0	0	0	0	0	0	3.33333	10	0	0	0	0	0	0	0	0	0	10	0	0	0	0	0	0	0	0	0	0	0	0	0	0
957	B St John	Florida Bays	2008	Pre	20081022	3	10:37:00	3.6	4	0.24	30.3099	87.4809		30	23.7		187.5	0	0	0	0	0	0	4.16667	8.33333	0	0	0	0	0	0	0	0	0	4.16667	0	0	0	0	0	0	0	0	0	0	0	0	0	0
958	B St John	Florida Bays	2008	Pre	20081022	4	10:53:00	4.1	5	0.341667	30.3105	87.4774		30	23.7		1211.71	0	0	0	0	0	0	0	237.073	0	0	0	0	0	0	0	0	0	23.4146	0	0	17.561	0	0	0	0	0	0	0	0	0	0	0
959	B St John	Florida Bays	2008	Pre	20081022	5	11:25:00	2.9	4	0.193333	30.3054	87.4504		30	23.7		1029.31	0	0	0	0	0	0	0	118.966	0	0	0	0	0	0	0	0	0	0	0	0	5.17241	0	0	0	0	0	0	0	0	0	0	0
960	B St John	Florida Bays	2008	Pre	20081022	6	11:39:00	4.1	11	0.751667	30.3057	87.4485		30	23.7		1414.19	0	0	0	0	0	0	0	98.4479	0	0	0	0	0	0	0	0	0	0	0	0	0	0	0	0	0	0	0	0	0	0	0	0
963	Chand Is	Chand Is	2008	Pre	20081106	1	10:13:00	2.9	4	0.193333	29.9733	88.8454		35	22		160.345	0	0	0	0	0	5.17241	0	25.8621	0	0	0	0	0	0	0	0	15.5172	0	0	0	0	0	0	0	0	0	0	0	0	0	0	0
964	Chand Is	Chand Is	2008	Pre	20081106	2	10:27:00	2.8	1.75	0.0816667	29.9721	88.8443		35	22		244.898	0	0	0	0	0	0	0	48.9796	0	0	0	0	0	0	0	0	12.2449	0	0	0	12.2449	0	0	0	0	0	0	0	0	0	0	0
965	Chand Is	Chand Is	2008	Pre	20081106	3	10:50:00	2.5	11.25	0.46875	29.9689	88.8412		35	22		232.533	0	0	0	0	0	0	0	19.2	0	0	0	0	0	0	0	0	10.6667	0	0	0	2.13333	0	0	0	0	0	0	0	0	0	0	0
966	Chand Is	Chand Is	2008	Pre	20081106	4	11:24:00	3	10	0.5	29.9304	88.8413		35	22		274	0	0	0	0	0	0	0	14	0	0	0	0	0	0	0	0	24	0	0	0	0	0	0	0	0	0	0	0	0	0	0	0
967	Chand Is	Chand Is	2008	Pre	20081106	5	11:38:00	3.1	12	0.62	29.2973	88.8413		35	22		274.194	0	0	0	0	0	0	0	9.67742	0	0	0	0	0	0	0	0	17.7419	0	0	0	1.6129	0	0	0	0	0	0	0	0	0	0	0
968	Chand Is	Chand Is	2008	Pre	20081106	6	11:55:00	3	20	1	29.9254	88.8411		35	22		153	0	0	0	0	0	0	0	2	1	0	0	1	0	0	0	0	6	0	0	0	0	0	0	0	0	0	0	0	0	0	0	0
969	Ship Is	Gulf Is	2008	Pre	20081106	7	13:34:00	4.4	21	1.54	30.2429	88.8874		35	22		27.2727	0	0	0	0	0	0	0.649351	5.19481	0	0	0	0	0	0.649351	0	0	0.649351	0	0	0	0	0	0	0	0	0	0	0	0	0	0	0
970	Chand Is	Chand Is	2009	Pre	20090810	1	10:30:00	2.3	2	0.0766667	29.9075	88.843	1.0-1.49	30	32.1	Add 1 pinfish	13.0435	0	0	0	0	0	0	0	0	0	0	0	0	0	0	0	0	0	0	0	0	0	0	0	0	0	0	0	0	0	0	0	0
971	Chand Is	Chand Is	2009	Pre	20090810	2	10:47:00	2.4	2	0.08	29.9094	88.8395	<1.0	32	32.3		1287.5	0	0	0	0	0	0	0	312.5	0	0	0	0	0	0	0	0	37.5	0	0	0	12.5	0	0	0	0	0	0	0	0	0	0	0
972	Chand Is	Chand Is	2009	Pre	20090810	3	10:55:00	2.6	5	0.216667	29.9105	88.8399	1.0-1.49	31	32.9		341.538	0	0	0	0	0	0	0	147.692	0	0	0	0	0	0	0	0	0	0	0	0	0	0	0	4.61538	0	0	0	0	0	0	0	0
973	Chand Is	Chand Is	2009	Pre	20090810	4	11:20:00	2.2	5	0.183333	29.9105	88.8407	<1.0	30	33.1		518.182	0	0	0	0	0	0	0	98.1818	0	0	0	0	0	0	0	0	5.45455	0	0	0	0	0	0	0	0	0	0	0	0	0	0	0
974	Chand Is	Chand Is	2009	Pre	20090810	5	11:39:00	2.3	5	0.191667	29.9121	88.8389	<1.0	32	33		151.304	0	0	0	0	0	0	0	0	0	0	0	0	0	0	0	0	0	0	0	0	0	0	0	0	0	0	0	0	0	0	0	0
975	Chand Is	Chand Is	2009	Pre	20090810	6	11:52:00	3.4	5	0.283333	29.912	88.8341	<1.0	33	32.9		370.588	0	0	0	0	0	0	0	3.52941	0	0	0	0	0	0	0	0	0	0	0	0	3.52941	0	0	0	0	0	0	0	0	0	0	0
976	Chand Is	Chand Is	2009	Pre	20090810	7	12:06:00	2.6	5	0.216667	29.9136	88.832	<1.0	33	33.1		913.846	0	0	0	0	0	0	0	101.538	9.23077	0	0	0	0	0	4.61538	0	18.4615	0	0	0	18.4615	0	0	0	0	0	0	0	0	0	0	0
977	Chand Is	Chand Is	2009	Pre	20090810	8	12:20:00	2.3	5	0.191667	29.914	88.8332	<1.0	33	33.1		709.565	0	0	0	0	0	20.8696	0	203.478	0	0	0	5.21739	0	0	0	0	0	0	0	0	0	0	0	0	0	0	0	0	0	0	0	0
978	Chand Is	Chand Is	2009	Pre	20090810	9	12:35:00	2.6	5	0.216667	29.9006	88.8347	<1.0	31	32.7		733.846	0	0	0	0	0	9.23077	0	216.923	0	0	0	0	0	0	0	0	9.23077	0	0	0	0	0	0	0	0	0	0	0	0	0	0	0
979	Chand Is	Chand Is	2009	Pre	20090810	10	01:43:00	2.5	5	0.208333	29.9254	88.8355	<1.0	30	32.4		518.4	0	0	0	0	0	4.8	0	100.8	0	0	0	0	0	0	0	0	0	0	0	0	0	0	0	0	0	0	0	0	0	0	0	0
980	Chand Is	Chand Is	2009	Pre	20090810	11	01:56:00	2.5	5	0.208333	29.927	88.8359	<1.0	30	32.4		648	0	0	0	0	0	0	0	182.4	0	0	0	0	0	0	0	0	0	0	0	0	4.8	0	0	0	0	0	0	0	0	0	0	0
981	Ship Is	Gulf Is	2009	Pre	20090810	12	15:23:00	2.7	10	0.45	30.2142	88.9617	<1.0	32	33.7		137.778	0	0	0	0	0	0	0	62.2222	0	0	0	0	0	0	0	0	0	0	0	0	0	0	0	0	0	0	0	0	0	0	0	0
982	Ship Is	Gulf Is	2009	Pre	20090810	13	15:52:00	2.9	10	0.483333	30.2168	88.9541	<1.0	30	34		124.138	0	0	0	0	0	0	0	51.7241	0	0	0	0	0	0	0	0	0	0	0	0	0	0	0	0	0	0	0	0	0	0	0	0
983	Ship Is	Gulf Is	2009	Pre	20090810	14	16:10:00	2.6	10	0.433333	30.2156	88.957	1.0-1.49	33	34.1		117.692	0	0	0	0	0	0	0	78.4615	0	0	0	0	0	0	0	0	0	0	0	0	0	0	0	0	0	0	0	0	0	0	0	0
984	Ship Is	Gulf Is	2009	Pre	20090810	15	16:45:00	2.7	10	0.45	30.2425	88.888	<1.0	31	34.1		120	0	0	0	0	0	0	0	46.6667	0	0	0	0	0	0	0	0	2.22222	0	0	0	0	0	0	0	0	0	0	0	0	0	0	0
985	Ship Is	Gulf Is	2009	Pre	20090810	16	17:15:00	2.3	10	0.383333	30.2398	88.8901	<1.0	31	34.2		206.087	0	0	0	0	0	0	0	36.5217	2.6087	0	0	0	0	0	0	0	0	0	0	0	0	0	0	0	0	0	0	0	0	0	0	0
986	DI	Gulf Is	2009	Pre	20090811	1	09:59:00	3.3	10	0.55	30.2402	88.2569	1.0-1.49	30	30.8889		832.727	0	0	0	0	0	0	0	0	0	0	0	0	0	0	0	0	1.81818	0	0	0	0	0	0	0	0	0	0	0	0	0	0	0
987	DI	Gulf Is	2009	Pre	20090811	2	10:23:00	2.7	11	0.495	30.2398	88.259	<1.0	30	31.3889		228.283	0	0	0	0	0	0	0	4.0404	0	0	0	0	0	0	0	0	0	0	0	0	2.0202	0	0	0	0	0	0	0	0	0	0	0
988	DI	Gulf Is	2009	Pre	20090811	3	10:45:00	2.2	10	0.366667	30.239	88.261	<1.0	30	31.2778		512.727	0	0	0	0	0	0	0	21.8182	0	0	0	0	0	0	0	0	0	0	0	0	0	0	0	0	0	0	0	0	0	0	0	0
989	DI	Gulf Is	2009	Pre	20090811	4	11:07:00	2.5	10	0.416667	30.2385	88.2627	<1.0	32	31.5		1008	0	0	0	0	0	0	0	45.6	0	0	0	0	0	0	0	0	2.4	0	0	0	4.8	0	0	0	0	0	0	0	0	0	0	0
990	PB Is	Gulf Is	2009	Pre	20090811	5	12:19:00	2.7	10.5	0.4725	30.2095	88.4184	1.5-1.99	29	31.7778		256.085	0	0	0	0	0	0	2.1164	0	0	0	0	0	0	0	0	0	2.1164	0	0	0	0	0	2.1164	0	0	0	0	0	0	0	0	0
991	PB Is	Gulf Is	2009	Pre	20090811	6	12:45:00	2.5	10	0.416667	30.2111	88.4202	1.5-1.99	32	31.8889		216	0	0	0	0	0	0	0	9.6	2.4	0	0	0	0	0	0	0	9.6	0	0	0	0	0	0	0	0	0	0	0	0	0	0	0
992	PB Is	Gulf Is	2009	Pre	20090811	7	13:16:00	2.5	15	0.625	30.2092	88.4235	<1.0	33	32.3889		294.4	0	0	0	0	0	0	0	8	0	0	0	0	0	0	0	0	4.8	0	0	0	0	0	0	0	0	0	0	0	0	0	0	0
993	PB Is	Gulf Is	2009	Pre	20090811	8	14:12:00	3.1	16	0.826667	30.2061	88.4355	<1.0	35	32.6667		124.597	0	0	0	0	0	0	1.20968	2.41935	0	0	0	0	0	0	0	0	0	0	0	0	0	0	0	0	0	0	0	0	0	0	0	0
994	GBS	Miss Sound	2009	Pre	20090811	9	15:01:00	2.6	5	0.216667	30.3625	88.3779	1.0-1.49	25	33.7778		55.3846	0	0	0	0	0	0	0	18.4615	0	0	0	0	0	0	0	0	13.8462	0	0	0	4.61538	0	0	0	0	0	0	0	0	0	0	0
995	GBS	Miss Sound	2009	Pre	20090811	10	15:19:00	2.3	12	0.46	30.3636	88.3754	1.0-1.49	25	33.7778		132.609	0	0	0	0	0	0	0	84.7826	0	0	0	0	0	4.34783	0	0	2.17391	0	0	0	13.0435	0	0	0	0	0	0	0	0	0	0	0
996	GBS	Miss Sound	2009	Pre	20090811	11	15:52:00	3.1	10	0.516667	30.3677	88.364	<1.0	24	34.0556		61.9355	0	0	0	0	0	0	0	27.0968	0	0	0	0	0	0	0	0	11.6129	0	0	0	3.87097	0	0	0	0	0	0	0	0	0	0	0
997	GBS	Miss Sound	2009	Pre	20090811	12	16:13:00	2.6	10	0.433333	30.3687	88.3643	1.0-1.49	24	33.7778		191.538	0	0	0	0	0	0	2.30769	110.769	0	0	0	0	0	0	0	0	0	0	0	0	11.5385	0	0	0	0	0	0	0	0	0	0	0
998	PAP	Miss Sound	2009	Pre	20090811	13	16:40:00	3	5	0.25			1.0-1.49	22	35.6667	need lat/long from core sample	952	0	0	0	0	0	0	0	336	0	0	0	0	0	0	0	0	12	0	0	0	44	0	0	0	0	0	0	0	0	0	0	0
999	Choc	Florida Bays	2009	Pre	20090812	1	10:46:00	2.4	4	0.16	30.3958	91.5242	1.0-1.49	18	31.5556		200	0	0	0	0	0	0	0	93.75	0	0	0	0	0	0	0	0	0	0	0	0	0	0	0	0	0	0	0	0	0	0	0	0
1000	Choc	Florida Bays	2009	Pre	20090812	2	10:59:00	2	5	0.166667	30.3972	86.3573	<1.0	19	31.6667		270	0	0	0	0	0	0	0	102	0	0	0	0	0	0	0	0	0	0	0	0	0	0	0	0	0	0	0	0	0	0	0	0
1001	Choc	Florida Bays	2009	Pre	20090812	3	11:14:00	2.5	5	0.208333	30.3975	86.5245	1.0-1.49	16	32		105.6	0	0	0	0	0	0	0	28.8	0	0	0	0	0	0	0	0	0	0	0	0	0	0	0	0	0	0	0	0	0	0	0	0
1002	Choc	Florida Bays	2009	Pre	20090812	4	11:26:00	2.3	6	0.23	30.3959	86.5252	<1.0	17	32		139.13	0	0	0	0	0	0	0	34.7826	0	0	0	0	0	0	0	0	0	0	0	0	0	0	0	0	0	0	0	0	0	0	0	0
1003	Choc	Florida Bays	2009	Pre	20090812	5	11:37:00	2.5	5	0.208333	30.3953	86.5264	1.5-1.99	17.5	32.1667		196.8	0	0	0	0	0	0	0	110.4	0	0	0	0	0	0	0	0	0	0	0	0	0	0	0	0	0	0	0	0	0	0	0	0
1004	Choc	Florida Bays	2009	Pre	20090812	6	11:49:00	1.5	5	0.125	30.3963	86.5262	1.0-1.49	18	32.0556		472	0	0	0	0	0	0	0	336	0	0	0	0	0	0	0	0	0	0	0	0	0	0	0	0	0	0	0	0	0	0	0	0
1005	Choc	Florida Bays	2009	Pre	20090812	7	12:09:00	1.9	5	0.158333	30.3967	86.5253	1.0-1.49	18	32.0556		101.053	0	0	0	0	0	0	0	18.9474	0	0	0	0	0	0	0	0	0	0	0	0	0	0	0	0	0	0	0	0	0	0	0	0
1006	Choc	Florida Bays	2009	Pre	20090812	8	12:16:00	2	6	0.2	30.3982	86.5268	1.0-1.49	15.5	32.5556		355	0	0	0	0	0	0	0	230	0	0	0	0	0	0	0	0	0	0	0	0	0	0	0	0	0	0	0	0	0	0	0	0
1007	Choc	Florida Bays	2009	Pre	20090812	9	12:37:00	2.4	11	0.44	30.3997	86.5264	1.5-1.99	15	32.3889		100	0	0	0	0	0	0	0	20.4545	0	0	0	0	0	0	0	0	0	0	0	0	0	0	0	0	0	0	0	0	0	0	0	0
1008	Choc	Florida Bays	2009	Pre	20090812	10	12:54:00	3.5	6	0.35	30.3955	86.5269	1.0-1.49	16	32.1667		128.571	0	0	0	0	0	0	0	80	0	0	0	0	0	0	0	0	0	0	0	0	0	0	0	0	0	0	0	0	0	0	0	0
1009	Choc	Florida Bays	2009	Pre	20090812	11	13:15:00	2.5	10	0.416667	30.3946	86.5318	1.0-1.49	16	32.5556		177.6	0	0	0	0	0	0	0	86.4	0	0	0	0	0	0	0	0	0	0	0	0	2.4	0	0	0	0	0	0	0	0	0	0	0
1010	Choc	Florida Bays	2009	Pre	20090812	12	13:37:00	2.8	11	0.513333	30.395	86.5332	<1.0	18.5	32.5556		151.948	0	0	0	0	0	0	0	64.2857	0	0	0	0	0	0	0	0	0	0	0	0	7.79221	0	0	0	0	0	0	0	0	0	0	0
1011	Choc	Florida Bays	2009	Pre	20090812	13	13:58:00	2.9	5	0.241667	30.4152	86.4959	1.5-1.99	16	33.2778		103.448	0	0	0	0	0	0	0	8.27586	0	0	0	0	0	0	0	0	0	0	0	0	12.4138	0	0	0	0	0	0	0	0	0	0	0
1012	Choc	Florida Bays	2009	Pre	20090812	14	14:12:00	2.3	7.5	0.2875	30.416	86.4928	1.5-1.99	15	33.2778		107.826	0	0	0	0	0	0	0	34.7826	0	0	0	0	0	0	0	0	3.47826	0	0	0	0	0	0	0	0	0	0	0	0	0	0	0
1013	Big Lag	Florida Bays	2009	Pre	20090813	1	10:44:00	2.5	6	0.25	30.31	87.3772	<1.0	24	30.0556		2672	0	0	0	0	0	0	0	520	0	0	0	0	0	0	0	0	0	0	0	0	4	0	0	0	0	0	0	0	0	0	0	0
1014	Big Lag	Florida Bays	2009	Pre	20090813	2	11:05:00	2.5	10	0.416667	30.3106	87.3734	<1.0	24	30.5		1024.8	0	0	0	0	0	0	0	100.8	2.4	0	0	0	0	0	0	0	0	0	0	0	4.8	0	0	0	0	0	0	0	0	0	0	0
1015	Big Lag	Florida Bays	2009	Pre	20090813	3	11:32:00	2.4	6	0.24	30.3108	87.3718	<1.0	22	30.3889		1450	0	0	0	0	0	0	0	70.8333	4.16667	0	0	0	0	0	0	0	0	0	0	0	8.33333	0	0	0	0	0	0	0	0	0	0	0
1016	Big Lag	Florida Bays	2009	Pre	20090813	4	11:59:00	1.8	5	0.15	30.324	87.3268	<1.0	25	31.3889		833.333	0	0	0	0	0	0	0	40	0	0	0	0	0	0	0	0	0	0	0	0	6.66667	0	0	0	0	0	0	0	0	0	0	0
1017	Big Lag	Florida Bays	2009	Pre	20090813	5	12:17:00	2.2	6	0.22	30.3253	87.3268	1.0-1.49	25	31.7778		581.818	0	0	0	0	0	0	0	4.54545	0	0	0	0	0	0	0	0	0	0	0	0	0	0	0	0	0	0	0	0	0	0	0	0
1018	Big Lag	Florida Bays	2009	Pre	20090813	6	12:40:00	2.4	10	0.4	30.3191	87.335	1.0-1.49	25	30.1667	core also used for Tow 14	1015	0	0	0	0	0	0	0	300	0	0	0	0	0	0	0	0	0	0	0	0	0	0	0	0	0	0	0	0	0	0	0	0
1019	Big Lag	Florida Bays	2009	Pre	20090813	7	13:58:00	3	10	0.5	30.3577	87.2016	1.0-1.49	19	30.5556		306	0	0	0	0	2	0	0	4	0	0	0	0	0	0	0	0	2	0	0	0	0	0	0	0	0	0	0	0	0	0	0	0
1021	Big Lag	Florida Bays	2009	Pre	20090813	9	14:40:00	2.7	10	0.45	30.3554	87.1983	<1.0	20	32		240	0	0	0	0	0	0	0	40	0	0	0	0	0	0	0	0	6.66667	0	0	0	0	0	0	0	0	0	0	0	0	0	0	0
1022	Big Lag	Florida Bays	2009	Pre	20090813	10	15:04:00	2.7	10	0.45	30.3547	87.1966	1.0-1.49	20	32		260	0	0	0	0	0	0	0	13.3333	0	0	0	0	0	0	0	0	2.22222	0	0	0	0	0	0	0	0	0	0	0	0	0	0	0
1023	Big Lag	Florida Bays	2009	Pre	20090813	11	15:22:00	2.4	10	0.4	30.3531	87.195	<1.0	20	32		270	0	0	0	0	0	0	0	5	0	0	0	0	0	0	0	0	2.5	0	0	0	2.5	0	2.5	0	0	0	0	0	0	0	0	0
1024	Big Lag	Florida Bays	2009	Pre	20090813	12	15:38:00	2.5	2	0.0833333	30.3528	87.1947	1.0-1.49	20	32		120	0	0	0	0	0	0	0	0	0	0	0	0	0	0	0	0	0	0	0	0	0	0	0	0	0	0	0	0	0	0	0	0
1025	Big Lag	Florida Bays	2009	Pre	20090813	13	15:48:00	1.7	10	0.283333	30.3547	87.1963	<1.0	21.5	35.3889	thermometer probably broken at this point	878.824	0	0	0	0	0	0	0	21.1765	0	0	0	0	0	0	0	0	7.05882	0	0	0	0	0	0	0	0	0	0	0	0	0	0	0
1026	Big Lag	Florida Bays	2009	Pre	20090813	14	16:31:00	2.6	5	0.216667	30.3197	87.3342	<1.0	27	34.5	core from Tow 7	1227.69	0	0	0	0	0	0	0	175.385	4.61538	0	0	0	0	0	0	0	0	0	0	0	0	0	0	0	0	0	0	0	0	0	0	0
1027	Horn Is	Gulf Is	2009	Pre	20090814	1	10:24:00	3.2	10	0.533333	30.2311	88.6302	1.0-1.49	30	30.3889		386.25	0	0	0	0	0	0	0	93.75	0	0	0	0	0	0	0	0	20.625	0	0	0	0	0	0	0	0	0	0	0	1.875	0	0	0
1028	Horn Is	Gulf Is	2009	Pre	20090814	2	10:57:00	3	10	0.5	30.2318	88.6356	1.0-1.49	30	30.3889		268	0	0	0	0	0	0	0	96	0	0	0	0	0	0	0	0	8	0	0	0	4	0	0	0	0	0	0	0	0	0	0	0
1029	Horn Is	Gulf Is	2009	Pre	20090814	3	11:19:00	2.5	12	0.5	30.2327	88.6414	<1.0	30	30.7778		316	0	0	0	0	0	0	0	84	0	0	0	0	0	0	0	0	18	0	0	0	4	0	0	0	0	0	0	0	0	0	0	0
1030	Horn Is	Gulf Is	2009	Pre	20090814	4	11:58:00	2.9	16	0.773333	30.2506	88.7045	1.0-1.49	30	31.7778		315.517	0	0	0	0	0	0	0	169.397	0	0	0	0	0	0	0	0	7.75862	0	0	0	3.87931	0	0	0	0	0	0	0	0	0	0	0
1031	Horn Is	Gulf Is	2009	Pre	20090814	5	12:21:00	2.5	11	0.458333	30.2507	88.7075	1.0-1.49	30	32.5556		894.545	0	0	0	0	0	0	0	490.909	0	0	0	0	0	0	0	0	8.72727	0	0	0	8.72727	0	0	0	0	0	0	0	0	0	0	0
1032	Horn Is	Gulf Is	2009	Pre	20090814	6	12:43:00	2.4	10	0.4	30.252	88.7094	<1.0	30	32.5556		787.5	0	0	0	0	0	0	0	110	0	0	0	0	0	0	0	0	10	0	0	0	10	0	0	0	0	0	0	0	0	0	0	0
1033	Horn Is	Gulf Is	2009	Pre	20090814	7	13:42:00	3	10	0.5	30.2468	88.7331	1.0-1.49	30	31.6667		600	0	0	0	0	0	0	0	202	2	0	0	0	0	0	0	0	24	0	2	0	6	0	0	0	0	0	0	0	0	0	0	0
1034	Horn Is	Gulf Is	2009	Pre	20090814	8	14:08:00	2.2	12.5	0.458333	30.2468	88.7377	1.0-1.49	30	31.6667		560.727	0	0	0	0	0	0	0	261.818	2.18182	0	0	0	0	0	0	0	15.2727	0	0	0	6.54545	0	0	0	0	0	0	0	0	0	0	0
1035	Horn Is	Gulf Is	2009	Pre	20090814	9	14:28:00	2.6	10	0.433333	30.2474	88.7417	1.0-1.49	30.5	31.7778		341.538	0	0	0	0	0	0	0	150	0	0	0	0	0	0	0	0	9.23077	0	0	0	4.61538	0	0	0	0	0	0	0	0	0	0	0
1036	SAS	Florida Bays	2009	Pre	20090815	1	11:36:00	2.6	5	0.216667	30.1203	85.7134	>2.0	31.5	30		1375.38	0	0	0	0	0	0	0	41.5385	0	0	0	0	0	0	0	0	0	0	0	0	4.61538	0	0	0	0	0	0	0	0	0	0	0
1037	SAS	Florida Bays	2009	Pre	20090815	2	11:59:00	3.1	6	0.31	30.1196	85.7123	<1.0	33			1096.77	0	0	0	0	0	0	0	12.9032	0	0	0	0	0	0	0	0	3.22581	0	0	0	0	0	0	0	0	0	0	0	0	0	0	0
1038	SAS	Florida Bays	2009	Pre	20090815	3	12:14:00	2.8	6	0.28	30.1191	85.7109		34	30.1667		817.857	0	0	0	0	0	0	0	14.2857	0	0	0	0	0	0	0	0	0	0	0	0	0	0	0	0	0	0	0	0	0	0	0	0
1039	SAS	Florida Bays	2009	Pre	20090815	4	12:39:00	2.7	7	0.315	30.1134	85.6809		33	31.2778		4190.48	0	0	0	0	0	0	0	82.5397	0	0	0	0	0	0	0	0	9.52381	0	0	0	3.1746	0	0	0	0	0	0	0	0	0	0	0
1040	SAS	Florida Bays	2009	Pre	20090815	5	13:02:00	3.2	10	0.533333	30.1166	85.6843					798.75	0	0	0	0	0	0	0	1.875	0	0	0	0	0	0	0	0	0	0	0	0	0	0	0	0	0	0	0	0	0	0	0	0
1041	SAS	Florida Bays	2009	Pre	20090815	6	13:25:00	3.5	10	0.583333	30.1205	85.6876	1.5-1.99	34	31.6667		1239.43	0	0	0	0	0	0	0	24	0	0	0	0	0	0	0	0	1.71429	0	0	0	0	0	0	0	0	0	0	0	0	0	0	0
1042	SAS	Florida Bays	2009	Pre	20090815	7	13:56:00	3.3	10	0.55	30.1107	85.6818	>2.0	34	30.3889		83.6364	0	0	0	0	0	0	0	0	0	0	0	0	0	0	0	0	0	0	0	0	0	0	0	0	0	0	0	0	0	0	0	0
1044	SAS	Florida Bays	2009	Pre	20090815	9	14:39:00	2.7	11	0.495	30.1316	85.6808	1.5-1.99	35	30.6667		929.293	0	0	0	0	0	0	0	12.1212	0	0	0	0	0	0	0	0	16.1616	0	0	0	0	0	0	0	0	0	0	0	0	2.0202	0	0
1045	SAS	Florida Bays	2009	Pre	20090815	10	15:10:00	2.7	10	0.45	30.1336	85.6788	1.5-1.99	35	31.2222		622.222	0	0	0	2.22222	0	0	0	4.44444	0	0	0	0	0	0	0	0	13.3333	0	0	0	0	0	0	0	0	0	0	0	0	4.44444	0	0
1046	SAS	Florida Bays	2009	Pre	20090815	11	16:06:00	2.5	10	0.416667	30.1431	85.7108	<1.0	33.5	31		1245.6	0	0	0	2.4	0	0	0	105.6	0	0	0	0	0	0	0	0	9.6	0	0	0	0	0	0	0	0	0	2.4	0	0	0	0	0
1047	SAS	Florida Bays	2009	Pre	20090815	12	16:27:00	2.6	10	0.433333	30.1464	85.7078	1.5-1.99	30.5	30.7778		780	0	0	0	0	0	0	0	34.6154	0	0	0	0	0	0	0	0	18.4615	0	0	0	0	0	0	0	0	0	0	0	0	0	0	0
1048	SAS	Florida Bays	2009	Pre	20090815	13	16:59:00	3.4	10	0.566667	30.1879	85.731	1.0-1.49	29.5	30.5556		330	0	0	0	0	0	0	0	33.5294	0	0	0	0	0	0	0	0	3.52941	0	0	0	1.76471	0	0	0	0	0	0	0	0	0	0	0
1049	SAS	Florida Bays	2009	Pre	20090815	14	17:19:00	2.3	10	0.383333	30.188	85.7339	>2.0	30	31.2778		297.391	0	0	0	0	0	0	0	10.4348	0	0	0	0	0	0	0	0	2.6087	0	0	0	2.6087	0	0	0	0	0	0	0	0	0	0	0
1050	SAS	Florida Bays	2009	Pre	20090815	15	17:37:00	2.7	10	0.45	30.1895	85.7274	1.0-1.49	30	31.5		24.4444	0	0	0	0	0	0	0	4.44444	0	0	0	0	0	0	0	0	2.22222	0	0	0	0	0	0	0	0	0	0	0	0	0	0	0
1051	PSJ	Florida Bays	2009	Pre	20090816	1	08:00:00	2.8	10	0.466667	29.7873	85.3042	<1.0	34	28.1667		657.857	0	0	0	0	0	0	0	64.2857	2.14286	0	0	4.28571	0	0	0	0	17.1429	0	0	0	4.28571	0	0	0	0	0	0	0	0	0	0	0
1052	PSJ	Florida Bays	2009	Pre	20090816	2	08:24:00	2.6	10	0.433333	29.7906	85.3042	<1.0	34	28.1667		436.154	0	0	0	0	0	0	0	55.3846	4.61538	0	0	0	0	0	0	0	16.1538	0	0	0	9.23077	0	0	0	0	0	0	0	0	2.30769	2.30769	0
1053	PSJ	Florida Bays	2009	Pre	20090816	3	09:00:00	2.4	10	0.4	29.793	85.3037	1.0-1.49	34.5	28.5556		937.5	0	0	0	0	0	0	0	75	0	0	0	0	0	0	0	0	37.5	0	0	0	2.5	0	2.5	0	0	0	0	0	0	0	0	0
1054	PSJ	Florida Bays	2009	Pre	20090816	4	09:25:00	2.2	10	0.366667	29.7962	85.3039	1.5-1.99	34.5	28.5556		1521.82	0	0	0	0	0	0	0	43.6364	19.0909	0	0	0	0	0	0	0	27.2727	0	0	0	0	0	0	0	0	0	0	0	0	0	0	0
1055	Big Lag	Florida Bays	2009	Pre	20090928	1	10:46:00	3	4	0.2	30.3202	87.3307	1.0-1.49	25	28.6		1440	0	0	0	0	0	0	0	20	0	0	0	0	0	0	0	0	0	0	0	0	10	0	0	0	0	0	0	0	0	0	0	0
1056	Big Lag	Florida Bays	2009	Pre	20090928	2	11:20:00	3.9	4.5	0.2925	30.3192	87.3336	<1.0	25.5	28.8		1637.61	0	0	0	0	0	0	0	167.521	0	0	0	0	0	0	0	0	0	0	0	0	3.4188	0	0	0	0	0	0	0	0	0	0	0
1057	Big Lag	Florida Bays	2009	Pre	20090928	3	11:37:00	3.5	5	0.291667	30.3189	87.3333	<1.0	25	28.9		2262.86	0	0	0	0	0	0	0	41.1429	0	0	0	0	0	0	0	0	0	0	0	0	10.2857	0	0	0	0	0	0	0	0	0	0	0
1058	Big Lag	Florida Bays	2009	Pre	20090928	4	11:58:00	3.4	6.5	0.368333	30.32	87.3344	<1.0	25	28.8		844.344	0	0	0	0	0	0	0	13.5747	0	0	0	0	0	0	0	0	0	0	0	0	0	0	0	0	0	0	0	0	0	0	0	0
1059	Big Lag	Florida Bays	2009	Pre	20090928	5	12:49:00	3.1	5	0.258333	30.31	87.3786	1.0-1.49	27	29.2		3027.1	0	0	0	0	0	0	0	116.129	0	0	0	0	0	0	0	0	0	0	0	0	15.4839	0	0	0	0	0	0	0	0	0	0	0
1061	Big Lag	Florida Bays	2009	Pre	20090928	7	13:35:00	3.1	2	0.103333	30.3044	87.3983	1.0-1.49	25	29.3		474.194	0	0	0	0	0	0	0	29.0323	0	0	0	0	0	0	0	0	0	0	0	0	0	0	0	0	0	0	0	0	0	0	0	0
1062	B St John	Florida Bays	2009	Pre	20090928	8	14:29:00	3.1	3	0.155	30.3097	87.4797	1.0-1.49	18	29.8		316.129	0	0	0	0	0	0	0	83.871	0	0	0	0	0	0	0	0	0	0	0	0	6.45161	0	6.45161	0	0	0	0	0	0	0	0	0
1063	B St John	Florida Bays	2009	Pre	20090928	9	14:39:00	3.5	9.5	0.554167	30.3097	87.4828	>2.0	20	29.8		476.391	0	0	0	0	0	0	0	12.6316	0	0	0	0	0	0	0	0	0	0	0	0	34.2857	0	0	0	0	0	0	0	0	0	0	0
1064	B St John	Florida Bays	2009	Pre	20090928	10	15:08:00	3.3	9	0.495	30.3108	87.4769	<1.0	17.5	30		569.697	0	0	0	0	0	0	0	20.202	0	0	0	0	0	0	0	0	2.0202	0	0	0	0	0	0	0	0	0	0	0	0	0	0	0
1065	B St John	Florida Bays	2009	Pre	20090928	11	15:43:00	3.9	15	0.975	30.3086	87.4517	<1.0	18	30		351.795	0	0	0	0	0	0	0	66.6667	0	0	0	0	0	0	0	0	0	0	0	0	1.02564	0	0	0	0	0	0	0	0	0	0	0
1066	PSJ	Florida Bays	2009	Pre	20090929	1	12:12:00	3.1	5	0.258333	29.0833	85.3056	1.0-1.49	24.5	28		2009.03	0	0	0	0	0	0	0	19.3548	0	0	0	0	0	0	0	0	27.0968	0	0	0	11.6129	0	0	0	0	0	0	0	0	0	3.87097	0
1067	PSJ	Florida Bays	2009	Pre	20090929	2	12:30:00	3.4	5	0.283333	29.0833	85.3056	1.0-1.49	24.5	27.8		1630.59	0	0	0	0	0	0	0	21.1765	3.52941	0	0	0	0	0	0	0	28.2353	0	0	0	3.52941	0	0	0	0	0	0	0	0	3.52941	0	0
1068	PSJ	Florida Bays	2009	Pre	20090929	3	12:51:00	2.8	5	0.233333	29.0833	85.3056	<1.0	24.5	28.4		1135.71	0	0	0	0	0	0	0	21.4286	0	0	0	0	0	0	0	0	111.429	0	0	0	0	0	0	0	0	0	0	0	0	0	0	0
1069	PSJ	Florida Bays	2009	Pre	20090929	4	13:12:00	2.4	5	0.2	29.0833	85.305	1.0-1.49	24.5	28.4		2120	0	0	0	0	0	0	0	150	0	0	0	0	0	0	0	0	80	0	0	0	5	0	0	0	0	0	0	0	0	0	0	0
1070	PSJ	Florida Bays	2009	Pre	20090929	5	13:27:00	3.1	10	0.516667	29.1667	85.3053	1.0-1.49	24.5	28.7		1349.03	0	0	0	0	0	0	0	98.7097	0	0	0	0	0	0	0	0	63.871	0	0	0	1.93548	0	0	0	0	0	0	0	0	0	0	0
1071	PSJ	Florida Bays	2009	Pre	20090929	6	14:45:00	3.2	6	0.32	29.1	85.4033	1.0-1.49	32	27.8		634.375	0	0	0	0	0	0	0	15.625	0	0	0	0	0	0	0	0	12.5	0	0	0	0	0	0	0	0	0	0	0	0	3.125	0	0
1072	PSJ	Florida Bays	2009	Pre	20090929	7	15:02:00	3.5	5	0.291667	29.0833	85.4036	1.0-1.49	31.5	27.9		541.714	0	0	0	0	0	0	0	10.2857	0	0	0	0	0	0	0	0	51.4286	0	0	0	3.42857	0	0	0	0	0	0	0	0	0	0	0
1073	PSJ	Florida Bays	2009	Pre	20090929	8	15:38:00	2.2	5	0.183333	29.0833	85.3389	<1.0	32	28.3		1870.91	0	0	0	0	0	0	0	0	0	0	0	0	0	0	0	0	5.45455	0	0	0	0	0	0	0	0	0	0	0	0	0	5.45455	0
1074	PSJ	Florida Bays	2009	Pre	20090929	9	16:04:00	3.7	5	0.308333	29.0833	85.3094	<1.0	27.5	28.3		1060.54	0	0	0	0	0	0	0	107.027	0	0	0	0	0	0	0	0	9.72973	0	0	0	0	0	0	0	0	0	0	0	0	0	0	0
1075	PSJ	Florida Bays	2009	Pre	20090929	10	16:20:00	3	5	0.25	29.0833	85.3083	1.0-1.49	27.5	28.2		424	0	0	0	0	0	0	0	0	0	0	0	0	0	0	0	0	24	0	0	0	0	0	0	0	0	0	0	0	0	0	0	0
1076	PSJ	Florida Bays	2009	Pre	20090929	11	16:38:00	3.6	10	0.6	29.1667	85.3078	<1.0	27	28.3		718.333	0	0	0	0	0	0	0	26.6667	0	0	0	0	0	0	0	0	40	0	0	0	1.66667	0	1.66667	0	0	0	0	0	0	0	0	0
1077	PSJ	Florida Bays	2009	Pre	20090929	12	17:08:00	3.5	10	0.583333	29.1667	85.3058	<1.0	27	28.5		1318.29	0	0	0	0	0	0	0	104.571	0	0	0	0	0	0	0	0	51.4286	0	0	0	8.57143	0	0	0	0	0	0	0	0	0	0	0
1078	SAS	Florida Bays	2009	Pre	20090930	1	09:11:00	3.1	5	0.258333	30.1083	85.6753	1.0-1.49	30	26.4		1200	0	0	0	0	0	0	0	7.74194	0	0	0	0	0	0	0	3.87097	3.87097	0	0	0	0	0	0	0	0	0	0	0	0	0	0	0
1079	SAS	Florida Bays	2009	Pre	20090930	2	09:27:00	2.8	5	0.233333	30.1103	85.6781	<1.0	29.5	26.5		1195.71	0	0	0	0	0	0	0	4.28571	0	0	0	0	0	0	4.28571	0	0	0	0	0	0	0	0	0	0	0	0	0	0	0	0	0
1080	SAS	Florida Bays	2009	Pre	20090930	3	09:41:00	3.3	5	0.275	30.1114	85.6792	<1.0	30	26.7		1440	0	0	0	0	0	0	0	36.3636	0	0	0	0	0	0	0	0	7.27273	0	0	0	7.27273	0	0	0	0	0	0	0	0	0	0	0
1081	SAS	Florida Bays	2009	Pre	20090930	4	10:02:00	3.2	5	0.266667	30.1131	85.6803	1.5-1.99	30	26.6		1646.25	0	0	0	0	0	0	0	37.5	0	0	0	0	0	0	0	0	0	0	0	0	0	0	0	0	0	0	0	0	0	0	0	0
1083	SAS	Florida Bays	2009	Pre	20090930	6	10:32:00	4	5	0.333333	30.1019	85.6839	1.0-1.49	30	26.8		453	0	0	0	0	0	0	0	27	0	0	0	0	0	0	0	0	0	0	0	0	0	0	0	0	0	0	0	0	0	0	0	0
1084	SAS	Florida Bays	2009	Pre	20090930	7	10:48:00	3.2	5	0.266667	30.1175	85.685	<1.0	31	26.5		1338.75	0	0	0	0	0	0	0	18.75	0	0	0	0	0	0	0	0	0	0	0	0	0	0	0	0	0	0	0	0	0	0	0	0
1085	SAS	Florida Bays	2009	Pre	20090930	8	11:06:00	3.7	5	0.308333	30.1192	85.6869	1.0-1.49	31	26.3		408.649	0	0	0	0	0	0	0	6.48649	0	0	0	0	0	0	0	0	3.24324	0	0	0	0	0	0	0	0	0	0	0	0	0	0	0
1086	SAS	Florida Bays	2009	Pre	20090930	9	11:21:00	3.7	5	0.308333	30.1211	85.6881	1.0-1.49	30.5	25.8		1148.11	0	0	0	0	0	0	0	25.9459	0	0	0	0	0	0	0	0	0	0	0	0	0	0	0	0	0	0	0	0	0	0	0	0
1087	SAS	Florida Bays	2009	Pre	20090930	10	12:12:00	3.1	5	0.258333	30.1206	85.715	>2.0	31	26.4		1192.26	0	0	0	0	0	0	0	259.355	0	0	0	0	0	0	0	0	7.74194	0	0	0	0	0	0	0	3.87097	0	0	0	0	0	0	0
1088	SAS	Florida Bays	2009	Pre	20090930	11	12:40:00	3.1	5	0.258333	30.1264	85.6856	<1.0	30.5	26.6		1470.97	0	0	0	0	0	0	0	3.87097	0	0	0	0	0	0	0	0	3.87097	0	0	0	0	0	0	0	0	0	0	3.87097	0	0	0	0
1089	SAS	Florida Bays	2009	Pre	20090930	12	12:59:00	4	5	0.333333	30.1306	85.6814	1.0-1.49	33	26.5		174	0	0	0	0	0	0	0	0	0	0	0	0	0	0	0	0	3	0	0	0	0	0	0	0	0	0	0	0	0	0	0	0
1090	SAS	Florida Bays	2009	Pre	20090930	13	13:14:00	3.1	10	0.516667	30.1311	85.6811	1.5-1.99	33	26.6		1072.26	0	0	0	0	0	0	0	1.93548	0	0	0	0	0	0	0	0	5.80645	0	0	0	0	0	0	0	0	0	0	0	0	0	0	0
1091	SAS	Florida Bays	2009	Pre	20090930	14	13:39:00	2.9	10	0.483333	30.1667	85.3058	1.0-1.49	33	26.7		786.207	0	0	0	0	0	0	0	6.2069	0	0	0	0	0	0	0	0	16.5517	0	0	0	0	0	0	0	0	0	0	0	0	0	0	0
1092	PB Is	Gulf Is	2009	Pre	20091001	1	09:03:00	4.4	11	0.806667	30.2094	88.4175	1.0-1.49	26	24.8		127.686	0	0	0	0	0	0	0	11.157	0	0	0	0	0	0	0	0	0	0	0	0	0	0	0	0	0	0	0	0	0	0	0	0
1093	PB Is	Gulf Is	2009	Pre	20091001	2	09:28:00	4.4	15	1.1	30.2092	88.4389	1.0-1.49	25	25		220.909	0	0	0	0	0	0	0	8.18182	0	0	0	0	0	0	0	0	1.81818	0	0	0	0	0	0	0	0	0	0	0.909091	0	0	0	0
1094	PB Is	Gulf Is	2009	Pre	20091001	3	09:56:00	4	20	1.33333	30.2111	88.4186	1.0-1.49	26	25.2		21	0	0	0	0	0	0	0	1.5	0	0	0	0	0	0	0	0	1.5	0	0	0	0	0	0	0	0	0	0	0	0	0	0	0
1095	PB Is	Gulf Is	2009	Pre	20091001	4	10:30:00	4.1	20	1.36667	30.2097	88.4206	1.0-1.49	25	25.3		521.707	0	0	0	0	0	0	0	36.5854	0	0	0	0	0	0	0	0	5.12195	0	0	0	0	0	0	0	0	0	0	0	0	0	0	0
1096	PB Is	Gulf Is	2009	Pre	20091001	5	11:01:00	3.9	20	1.3	30.2103	88.4214	1.0-1.49	25	25.4		384.615	0.769231	0	0	0	0	0	0	10.7692	0	0	0	0	0	0	0	0	1.53846	0	0	0	0	0	0	0	0	0	0	8.46154	0	0	0	0
1097	PB Is	Gulf Is	2009	Pre	20091001	6	11:39:00	4.2	15	1.05	30.2106	88.4228	1.0-1.49	24	25.6		618.095	0	0	0	0	0	0	0	4.7619	0	0	0	0	0	0	0	0	1.90476	0	0	0	0	0	0	0	0	0	0	0	0	0	0	0
1098	PB Is	Gulf Is	2009	Pre	20091001	7	12:37:00	4.3	20	1.43333	30.2075	88.435	1.5-1.99	26	25.3		90.6977	0	0	0	0	0	0	0	12.5581	0	0	0	0	0	0	0	0	0	0	0	0	0	0	0	0	0	0	0	0	0	0	0	0
1099	GBS	Miss Sound	2009	Pre	20091001	8	13:53:00	3.3	5	0.275	30.3658	88.37	1.0-1.49	15	26		80	0	0	0	0	0	0	0	54.5455	0	0	0	0	0	0	0	0	3.63636	0	0	0	0	0	0	0	0	0	0	0	0	0	0	0
1100	GBS	Miss Sound	2009	Pre	20091001	9	14:08:00	3.4	5	0.283333	30.3664	88.3708	1.0-1.49	15.5	26.2		137.647	0	0	0	0	0	0	0	38.8235	0	0	0	0	0	0	0	0	7.05882	0	0	0	17.6471	0	0	0	0	0	0	0	0	0	0	0
1101	GBS	Miss Sound	2009	Pre	20091001	10	14:24:00	3.1	5	0.258333	30.3675	88.37	1.0-1.49	16	26.3		143.226	0	0	0	0	0	0	0	27.0968	0	0	0	0	0	0	0	0	11.6129	0	0	0	50.3226	0	0	0	0	0	0	0	0	0	0	0
1102	GBS	Miss Sound	2009	Pre	20091001	11	14:39:00	3.1	5	0.258333	30.3681	88.3694	1.0-1.49	15.5	26.4		77.4194	0	0	0	0	0	0	0	0	0	0	0	0	0	0	0	0	11.6129	0	0	0	34.8387	0	3.87097	0	0	0	0	0	0	0	0	0
1103	GBS	Miss Sound	2009	Pre	20091001	12	14:54:00	3.7	10	0.616667	30.3675	88.3678	<1.0	15.5	26.4		460.541	0	0	0	0	0	0	0	82.7027	0	0	0	0	0	0	0	0	27.5676	0	0	0	4.86486	0	1.62162	0	0	0	0	0	0	0	0	0
1104	GBS	Miss Sound	2009	Pre	20091001	13	15:22:00	3.8	11	0.696667	30.3686	88.3653	<1.0	16	26.6		76.0766	0	0	0	0	0	0	0	44.4976	0	0	0	0	0	0	0	0	7.17703	0	0	0	2.87081	0	7.17703	0	0	0	0	0	0	0	0	0
1105	Pen	Florida Bays	2009	Pre	20091002	1	10:34:00	3.4	5	0.283333	30.3597	87.2033	1.5-1.99	19	24.7		737.647	0	0	0	0	0	0	0	0	0	0	0	0	0	0	0	0	3.52941	0	0	0	3.52941	0	0	0	0	0	0	0	0	0	0	0
1106	Pen	Florida Bays	2009	Pre	20091002	2	10:49:00	2.9	6	0.29	30.3581	87.2014	1.0-1.49	18	24.6		562.069	0	0	0	0	0	0	0	6.89655	0	0	0	0	0	0	0	0	0	0	0	0	3.44828	0	0	0	0	0	0	0	0	0	0	0
1107	Pen	Florida Bays	2009	Pre	20091002	3	11:07:00	3.2	8.5	0.453333	30.3572	87.2011	1.5-1.99	18	24.6		509.559	0	0	0	0	0	0	0	22.0588	0	0	0	0	0	0	0	0	4.41176	0	0	0	4.41176	0	0	0	0	0	0	0	0	0	0	0
1108	Pen	Florida Bays	2009	Pre	20091002	4	11:34:00	3	7	0.35	30.3531	87.1944	1.0-1.49	18	24.6		614.286	0	0	0	0	0	2.85714	0	17.1429	0	0	0	0	0	0	0	0	2.85714	0	0	0	8.57143	0	0	0	0	0	0	0	0	0	0	0
1109	B St John	Florida Bays	2009	Pre	20091002	5	12:58:00	4	10.5	0.7	30.3039	87.455	<1.0	21	24.9		634.286	0	0	0	0	0	0	0	141.429	0	0	0	0	0	0	0	0	0	0	0	0	5.71429	0	0	0	0	0	0	0	0	0	0	0
1110	B St John	Florida Bays	2009	Pre	20091002	6	13:31:00	4.1	8	0.546667	30.3075	87.4475	1.0-1.49	21	25		400.61	0	0	0	0	0	0	1.82927	166.463	0	0	0	0	0	0	0	0	0	0	0	0	18.2927	0	0	0	0	0	0	0	0	0	0	0
1111	B St John	Florida Bays	2009	Pre	20091002	7	14:24:00	3.1	12	0.62	30.3186	87.3331	<1.0	24	25.4		1100	0	0	0	0	0	0	0	64.5161	3.22581	0	0	0	0	0	0	0	0	0	0	0	9.67742	0	0	0	0	0	0	0	0	0	0	0
1112	Chand Is	Chand Is	2009	Pre	20091003	1	10:23:00	3.1	10	0.516667	29.955	88.8397	1.0-1.49	27	25.4		1374.19	0	0	0	0	0	1.93548	0	336.774	0	0	0	0	0	0	0	0	1.93548	0	0	0	0	0	0	0	0	0	0	0	0	0	0	0
1113	Chand Is	Chand Is	2009	Pre	20091003	2	10:51:00	3	11	0.55	29.9519	88.8436	<1.0	27	25.4		1581.82	0	0	0	0	0	1.81818	1.81818	85.4545	3.63636	0	0	0	0	0	0	0	0	0	0	0	3.63636	0	1.81818	0	0	0	0	0	0	0	0	0
1114	Chand Is	Chand Is	2009	Pre	20091003	3	12:11:00	4.4	4.5	0.33	29.8881	88.8517	1.0-1.49	26	25.4		75.7576	0	0	0	0	0	3.0303	0	9.09091	0	0	0	0	0	0	0	0	0	0	0	0	0	0	0	0	0	0	0	0	0	0	0	0
1115	Chand Is	Chand Is	2009	Pre	20091003	4	12:34:00	3.6	11	0.66	29.8853	88.8553	1.0-1.49	26	25.4		456.061	0	0	0	0	0	1.51515	0	87.8788	0	0	0	0	0	0	0	0	10.6061	0	0	0	0	0	0	0	0	0	0	0	0	0	0	0
1153	Pen	Florida Bays	2010	Post	20100912	1	10:41:00	3.4	2	0.113333	30.3601	87.2041	1.5-1.99	23	28		2267.65	0	0	0	0	0	35.2941	0	247.059	8.82353	0	0	0	0	0	0	8.82353	17.6471	0	0	0	8.82353	0	8.82353	0	0	0	0	0	0	0	0	0
1154	Pen	Florida Bays	2010	Post	20100912	2	11:01:00	3.7	2.5	0.154167	30.3597	87.2041	1.5-1.99	23	28		1615.14	0	0	0	0	0	0	0	0	25.9459	0	0	0	0	0	0	0	25.9459	0	0	0	0	0	6.48649	0	0	0	0	0	0	0	0	0
1155	Pen	Florida Bays	2010	Post	20100912	3	11:16:00	3	2	0.1	30.3591	87.2028	1.5-1.99	23	28		4610	0	0	0	0	0	40	0	360	20	0	0	0	0	0	0	0	10	0	0	0	20	0	0	0	0	0	0	0	0	0	0	0
1156	Pen	Florida Bays	2010	Post	20100912	4	11:36:00	2.2	2	0.0733333	30.3581	87.2025	1.5-1.99	23	28		2509.09	0	0	0	0	0	81.8182	0	190.909	0	0	0	0	0	0	0	27.2727	40.9091	0	0	0	0	0	0	0	0	13.6364	0	0	0	0	0	0
1157	Pen	Florida Bays	2010	Post	20100912	5	11:53:00	3.6	2	0.12	30.3577	87.2018	1.5-1.99	25	29		3266.67	0	0	0	0	0	25	0	241.667	0	0	0	0	0	0	0	0	8.33333	0	0	0	8.33333	0	0	0	0	0	0	0	0	0	0	0
1158	Pen	Florida Bays	2010	Post	20100912	6	12:14:00	3.3	2	0.11	30.3573	87.2005	1.5-1.99	25	29		1309.09	0	0	0	0	0	9.09091	0	0	9.09091	0	0	0	0	0	0	0	9.09091	0	0	0	0	0	0	0	0	0	0	0	0	0	0	0
1159	Pen	Florida Bays	2010	Post	20100912	7	12:28:00	3.5	2.25	0.13125	30.3564	87.1993	1.5-1.99	25	29		1020.95	0	0	0	0	0	0	0	7.61905	7.61905	0	0	0	0	0	0	0	0	0	0	0	7.61905	0	0	0	0	0	0	0	0	0	0	0
1160	Pen	Florida Bays	2010	Post	20100912	8	12:44:00	2.9	2	0.0966667	30.3554	87.1982	1.5-1.99	25	29		1375.86	0	0	0	0	0	20.6897	0	20.6897	10.3448	0	0	0	0	0	0	0	31.0345	0	0	0	0	0	0	0	0	0	0	0	0	0	0	0
1161	Big Lag	Florida Bays	2010	Post	20100912	9	13:20:00	3.8	2	0.126667	30.323	87.327	1.0-1.49	24	29.5		5068.42	0	0	0	0	0	0	0	568.421	0	0	0	0	0	0	0	0	0	0	0	0	7.89474	0	0	0	0	0	0	0	0	0	0	0
1162	Big Lag	Florida Bays	2010	Post	20100912	10	13:36:00	3.4	2.5	0.141667	30.3232	87.3271	1.0-1.49	24	29.5		3967.06	0	0	0	0	0	0	0	494.118	0	0	0	0	0	0	0	0	21.1765	0	0	0	21.1765	0	0	0	0	0	0	0	0	0	0	0
1163	Big Lag	Florida Bays	2010	Post	20100912	11	14:02:00	2.9	2	0.0966667	30.3191	87.3335	1.0-1.49	24	29.5		5937.93	0	0	0	0	0	0	0	1200	10.3448	0	0	0	0	0	0	0	10.3448	0	0	0	20.6897	0	0	0	0	20.6897	0	0	0	0	0	0
1164	Big Lag	Florida Bays	2010	Post	20100912	12	14:25:00	3.4	2	0.113333	30.3197	87.3339	<1.0	23	29.5		2179.41	0	0	0	0	0	8.82353	0	88.2353	0	0	0	0	0	0	0	0	0	0	0	0	26.4706	0	0	0	0	0	0	0	0	0	0	0
1165	Big Lag	Florida Bays	2010	Post	20100912	13	14:48:00	1.9	2	0.0633333	30.3104	87.3776	<1.0	22	29.5		12600	0	0	0	0	0	63.1579	0	568.421	31.5789	0	0	0	0	0	0	0	0	0	0	0	31.5789	0	0	0	0	0	0	0	0	0	0	0
1166	Big Lag	Florida Bays	2010	Post	20100912	14	15:06:00	2.3	2	0.0766667	30.3109	87.3728	<1.0	22	29.5		5060.87	0	0	0	0	0	52.1739	0	339.13	130.435	0	0	0	0	0	0	0	0	0	0	0	0	0	0	0	0	0	0	0	0	0	0	0
1167	Big Lag	Florida Bays	2010	Post	20100912	15	15:21:00	1.9	2	0.0633333	30.3114	87.3702	<1.0	22	29.5		6347.37	0	0	0	0	0	0	0	268.421	63.1579	0	0	0	0	0	0	0	0	0	0	0	0	0	0	0	0	0	0	0	0	0	0	0
1168	Big Lag	Florida Bays	2010	Post	20100912	16	15:40:00	2.7	2	0.09	30.3128	87.3681	<1.0	22	29.5		4677.78	0	0	0	0	0	0	0	388.889	77.7778	0	0	0	0	0	0	0	0	0	0	0	11.1111	0	0	0	0	0	0	0	0	0	0	0
1169	PSJ	Florida Bays	2010	Post	20100913	1	13:05:00	3.1	2	0.103333	29.84	85.4021	1.5-1.99	30	29.5		2380.65	0	0	0	0	0	0	0	87.0968	0	0	0	0	29.0323	0	0	0	183.871	0	0	0	0	0	0	0	0	0	9.67742	0	0	0	0	0
1170	PSJ	Florida Bays	2010	Post	20100913	2	13:22:00	3.4	2	0.113333	29.8392	85.4018	1.5-1.99	30	29.5		2708.82	0	0	0	0	0	0	0	105.882	0	0	0	0	17.6471	0	0	0	79.4118	0	0	0	0	0	0	0	0	0	0	0	0	0	0	0
1171	PSJ	Florida Bays	2010	Post	20100913	3	13:39:00	2.7	2	0.09	29.8381	85.403	1.5-1.99	30	29.5		2633.33	0	0	0	0	0	0	0	66.6667	0	0	0	0	0	0	0	11.1111	100	0	0	0	0	0	0	0	0	0	0	0	0	0	0	0
1172	PSJ	Florida Bays	2010	Post	20100913	4	13:54:00	2.9	2	0.0966667	29.837	85.4042	1.5-1.99	30	29.5		3113.79	0	0	0	0	0	0	0	144.828	10.3448	0	0	0	0	0	0	0	93.1034	0	0	0	0	0	0	0	0	0	0	0	0	0	0	0
1173	PSJ	Florida Bays	2010	Post	20100913	5	14:17:00	2.8	2	0.0933333	29.7985	85.4036	1.5-1.99	31	28		3439.29	0	0	32.1429	0	0	0	0	53.5714	10.7143	0	0	0	0	0	0	0	32.1429	0	0	0	0	0	0	0	0	10.7143	0	0	0	0	0	0
1174	PSJ	Florida Bays	2010	Post	20100913	6	14:33:00	2.7	2	0.09	29.8007	85.405	1.5-1.99	31	28		2177.78	0	0	0	0	0	0	0	100	0	0	0	0	22.2222	0	0	11.1111	55.5556	0	0	0	0	0	0	0	0	0	0	0	0	0	0	0
1175	PSJ	Florida Bays	2010	Post	20100913	7	14:45:00	3	2	0.1	29.8026	85.4062	1.5-1.99	31	28		2810	0	0	0	0	0	0	0	250	0	0	0	0	0	0	0	10	120	0	0	0	0	0	0	0	0	0	10	0	0	0	0	0
1176	PSJ	Florida Bays	2010	Post	20100913	8	15:00:00	3.3	2	0.11	29.8058	85.407	1.5-1.99	31	28		2636.36	0	0	0	0	0	0	0	109.091	0	0	0	0	0	0	0	0	90.9091	0	0	0	0	0	0	0	0	0	0	0	0	0	0	0
1177	PSJ	Florida Bays	2010	Post	20100913	9	15:55:00	3	2	0.1	29.7111	85.3387	1.5-1.99	30	29.5		7900	0	0	0	0	0	0	0	10	0	0	0	0	0	0	0	0	70	0	0	0	0	0	0	0	0	0	0	0	0	0	0	0
1178	PSJ	Florida Bays	2010	Post	20100913	10	16:11:00	3.3	3	0.165	29.7105	85.3376	1.5-1.99	30	29.5		9896.97	0	0	0	0	0	0	0	939.394	6.06061	0	0	0	6.06061	0	0	0	18.1818	0	0	0	6.06061	0	0	0	0	0	0	0	0	0	0	0
1179	PSJ	Florida Bays	2010	Post	20100913	11	16:38:00	3.3	2	0.11	29.7135	85.3295	1.5-1.99	30	29.5	Add 1 pinfish	9.09091	0	0	0	0	0	0	0	0	0	0	0	0	0	0	0	0	0	0	0	0	0	0	0	0	0	0	0	0	0	0	0	0
1180	PSJ	Florida Bays	2010	Post	20100913	12	16:43:00	3.1	2	0.103333	29.7146	85.3284	1.5-1.99	30	29.5		7935.48	0	0	0	0	0	0	0	503.226	19.3548	0	0	0	0	0	0	0	0	0	0	0	0	0	0	0	0	0	0	0	0	0	0	0
1181	PSJ	Florida Bays	2010	Post	20100913	13	17:10:00	3.2	2	0.106667	29.7664	85.3096	1.0-1.49	30	28		1837.5	0	0	0	0	0	0	0	18.75	0	0	0	0	9.375	0	0	0	28.125	0	0	0	0	0	0	0	0	0	0	0	0	0	0	0
1182	PSJ	Florida Bays	2010	Post	20100913	14	17:21:00	3.2	2	0.106667	29.7732	85.3077	1.0-1.49	30	28		11756.2	0	0	0	0	0	0	0	346.875	0	0	0	0	0	0	0	0	37.5	0	0	0	0	0	0	0	0	0	0	0	0	0	0	0
1183	PSJ	Florida Bays	2010	Post	20100913	15	17:40:00	2.8	2	0.0933333	29.7762	85.3081	1.0-1.49	30	28		7403.57	0	0	0	0	0	0	0	0	0	0	0	0	32.1429	0	0	0	10.7143	0	0	0	0	0	0	0	0	0	0	0	0	0	0	0
1184	PSJ	Florida Bays	2010	Post	20100913	16	17:52:00	2.5	2	0.0833333	29.778	85.3072	1.0-1.49	30	28		7920	0	0	0	0	0	0	0	12	0	0	0	0	0	0	0	0	0	0	0	0	12	0	0	0	0	0	0	0	0	0	0	0
1185	PSJ	Florida Bays	2010	Post	20100913	17	18:04:00	2.7	2	0.09	29.7795	85.3065	1.0-1.49	30	28		5933.33	0	0	0	0	0	0	0	55.5556	0	0	0	0	11.1111	0	0	0	33.3333	0	0	0	0	0	0	0	0	0	0	0	0	0	0	0
1186	PSJ	Florida Bays	2010	Post	20100913	18	18:17:00	2.7	2	0.09	29.7809	85.3062	1.0-1.49	30	28		8355.56	0	0	0	0	0	0	0	22.2222	0	0	0	0	0	0	0	0	22.2222	0	0	0	0	0	0	0	0	0	0	0	0	0	0	0
1187	PSJ	Florida Bays	2010	Post	20100913	19	18:30:00	2.6	2	0.0866667	29.7825	85.3059	1.0-1.49	30	28		6115.38	0	0	0	0	0	0	0	11.5385	0	0	0	0	11.5385	0	0	0	57.6923	0	0	0	0	0	0	0	0	0	0	0	0	0	0	0
1188	PSJ	Florida Bays	2010	Post	20100913	20	18:44:00	2.9	2	0.0966667	29.7839	85.3061	1.0-1.49	30	28		2855.17	0	0	0	0	0	0	0	0	0	0	0	0	0	0	0	0	62.069	0	0	0	0	0	10.3448	0	0	0	0	0	0	0	0	0
1189	SAS	Florida Bays	2010	Post	20100914	1	08:56:00	2.6	2	0.0866667	30.1212	85.7153	>2.0	30	26.5		1926.92	0	11.5385	0	0	0	0	0	126.923	0	0	0	0	23.0769	0	0	11.5385	23.0769	0	0	0	0	0	0	0	0	0	0	0	0	0	0	0
1190	SAS	Florida Bays	2010	Post	20100914	2	09:13:00	2.7	2.5	0.1125	30.1202	85.7139	1.5-1.99	30	26.5		4080	0	0	0	0	0	0	0	44.4444	26.6667	0	0	0	8.88889	0	0	0	8.88889	0	0	0	0	0	0	0	0	0	0	0	0	0	0	0
1191	SAS	Florida Bays	2010	Post	20100914	3	09:35:00	3.2	2	0.106667	30.1122	85.6798	<1.0	29	27		8484.38	0	0	0	0	0	0	0	112.5	0	0	0	0	0	0	0	0	9.375	0	0	0	28.125	0	0	0	0	0	0	0	0	0	0	0
1192	SAS	Florida Bays	2010	Post	20100914	4	09:54:00	2.8	2	0.0933333	30.1136	85.6811	<1.0	29	27		2432.14	0	0	0	0	0	0	0	53.5714	10.7143	0	0	0	10.7143	0	0	0	0	0	0	0	0	0	0	0	0	0	0	0	0	0	0	0
1193	SAS	Florida Bays	2010	Post	20100914	5	10:09:00	2.7	2.5	0.1125	30.1148	85.6828	<1.0	29	27		4248.89	0	0	0	0	0	0	0	53.3333	0	0	0	0	0	0	0	0	26.6667	0	0	0	0	0	0	0	0	0	8.88889	0	0	0	0	0
1194	SAS	Florida Bays	2010	Post	20100914	6	10:27:00	3.4	2	0.113333	30.1169	85.6843	<1.0	29	27		3202.94	0	0	0	0	0	0	0	8.82353	8.82353	0	0	0	0	0	0	0	0	0	0	0	0	0	0	0	0	0	0	0	0	0	0	0
1195	SAS	Florida Bays	2010	Post	20100914	7	11:36:00	3	2	0.1	30.129	85.6669	<1.0	29	27		1740	0	0	0	0	0	0	0	0	0	0	0	0	0	0	0	0	20	0	0	0	0	0	0	0	0	0	0	0	0	0	0	0
1196	SAS	Florida Bays	2010	Post	20100914	8	11:46:00	2.8	2	0.0933333	30.1307	85.6817	<1.0	28	28		5914.29	0	0	0	0	0	0	0	96.4286	0	0	0	0	10.7143	0	0	0	10.7143	0	0	0	0	0	0	0	0	0	0	0	0	0	0	0
1197	SAS	Florida Bays	2010	Post	20100914	9	12:09:00	4	2	0.133333	30.1312	85.6807	<1.0	28	28		3607.5	0	0	0	0	0	0	0	0	7.5	0	0	0	7.5	0	0	0	0	0	0	0	0	0	0	0	0	0	0	0	0	0	0	0
1198	SAS	Florida Bays	2010	Post	20100914	10	12:27:00	3.3	2	0.11	30.1319	85.6804	<1.0	28	28		2636.36	0	0	0	0	0	0	0	63.6364	0	0	0	0	0	0	0	0	27.2727	0	0	0	0	0	0	0	0	0	0	0	0	0	0	0
1199	SAS	Florida Bays	2010	Post	20100914	11	12:55:00	3.3	1.5	0.0825	30.1874	85.7321	<1.0	27	28		4630.3	0	0	0	0	0	0	0	363.636	0	0	0	0	0	0	0	0	12.1212	0	0	0	0	0	0	0	0	0	0	0	0	0	0	0
1200	SAS	Florida Bays	2010	Post	20100914	12	13:05:00	2.1	2	0.07	30.1878	85.732	<1.0	27	28		3614.29	0	0	0	0	0	0	0	271.429	0	0	0	0	0	0	0	0	0	0	0	0	14.2857	0	0	0	0	0	0	0	0	0	0	0
1201	Choc	Florida Bays	2010	Post	20100914	13	15:23:00	3.1	2	0.103333	30.3969	86.5243	<1.0	24	27		416.129	0	0	0	0	0	0	0	9.67742	0	0	0	0	0	0	0	0	0	0	0	0	0	0	0	0	0	0	0	0	0	0	0	0
1202	Choc	Florida Bays	2010	Post	20100914	14	15:30:00	3	2	0.1	30.3977	86.5239	<1.0	24	27		420	0	0	0	0	0	0	0	0	0	0	0	0	0	0	0	0	0	0	0	0	0	0	0	0	0	0	0	0	0	0	0	0
1203	Choc	Florida Bays	2010	Post	20100914	15	15:41:00	3.1	2	0.103333	30.3993	86.5218	<1.0	24	27		212.903	0	0	0	0	0	0	9.67742	0	0	0	0	0	0	0	0	0	19.3548	0	0	0	0	0	0	0	0	0	0	0	0	0	0	0
1204	Choc	Florida Bays	2010	Post	20100914	16	15:51:00	3.1	2	0.103333	30.4002	85.5228	<1.0	24	27		396.774	0	0	0	0	0	0	0	106.452	0	0	0	0	0	0	0	0	0	0	0	0	0	0	0	0	0	0	0	0	0	0	0	0
1205	Choc	Florida Bays	2010	Post	20100914	17	16:01:00	2.5	2	0.0833333	30.3983	86.5248	<1.0	24	27		552	0	0	0	0	0	0	12	24	0	0	0	0	0	0	0	0	0	0	0	0	0	0	0	0	0	0	0	0	0	0	0	0
1206	Choc	Florida Bays	2010	Post	20100914	18	16:31:00	2.9	2	0.0966667	30.3961	86.5257	<1.0	24	27		186.207	0	0	0	0	0	10.3448	10.3448	41.3793	0	0	0	0	0	0	0	0	0	0	0	0	0	0	0	0	0	0	0	0	0	0	0	0
1207	Choc	Florida Bays	2010	Post	20100914	19	16:22:00	2.9	2	0.0966667	30.3964	86.5268	<1.0	24	27		496.552	0	0	0	0	0	0	93.1034	31.0345	0	0	0	0	0	0	0	0	0	0	0	0	10.3448	0	0	0	0	0	0	0	0	0	0	0
1208	Choc	Florida Bays	2010	Post	20100914	20	16:32:00	2.8	2	0.0933333	30.3976	86.5256	<1.0	24	27		310.714	0	0	0	0	0	0	0	96.4286	0	0	0	0	0	0	0	0	0	0	0	0	0	0	0	0	0	0	0	0	0	0	0	0
1209	Choc	Florida Bays	2010	Post	20100914	21	16:41:00	2.4	2	0.08	30.3988	86.5253	<1.0	24	27		400	0	0	0	0	0	0	12.5	100	0	0	0	0	0	0	0	0	0	0	0	0	0	0	0	0	0	0	0	0	0	0	0	0
1210	Choc	Florida Bays	2010	Post	20100914	22	16:52:00	3.1	2	0.103333	30.3996	86.5264	<1.0	24	27		948.387	0	0	0	0	0	19.3548	0	203.226	9.67742	0	0	0	0	0	0	0	0	0	0	0	19.3548	0	0	0	0	0	0	0	0	0	0	0
1211	Choc	Florida Bays	2010	Post	20100914	23	17:09:00	3.3	2	0.11	30.3977	86.5272	<1.0	24	27		400	0	0	0	0	0	0	45.4545	63.6364	9.09091	0	0	0	0	0	0	0	0	0	0	0	27.2727	0	0	0	0	0	0	0	0	0	0	0
1212	Choc	Florida Bays	2010	Post	20100914	24	17:19:00	3.3	2	0.11	30.3967	86.5277	<1.0	24	27		781.818	0	0	0	0	0	0	9.09091	245.455	0	0	0	0	0	0	0	0	0	0	0	0	27.2727	0	0	0	0	0	0	0	0	0	0	0
1213	PB Is	Gulf Is	2010	Post	20100915	1	10:08:00	4.8	2	0.16	30.2092	88.4188	1.0-1.49	28			381.25	0	0	0	0	0	0	87.5	0	0	0	0	0	0	0	0	0	0	0	0	0	0	0	0	0	0	0	0	0	0	0	0	0
1214	PB Is	Gulf Is	2010	Post	20100915	2	10:19:00	3.6	2.5	0.15	30.21	88.4215	1.0-1.49	28			293.333	0	0	0	0	0	0	106.667	6.66667	6.66667	0	0	0	0	0	0	0	0	0	0	0	0	0	0	0	0	0	0	0	0	0	0	0
1216	PB Is	Gulf Is	2010	Post	20100915	4	10:42:00	3.8	2	0.126667	30.2119	88.4233	1.0-1.49	28			323.684	0	0	0	0	0	0	15.7895	0	0	0	0	0	0	0	0	0	7.89474	0	0	0	0	0	0	0	0	7.89474	0	0	0	0	0	0
1217	PB Is	Gulf Is	2010	Post	20100915	5	10:55:00	3.9	2.25	0.14625	30.2111	88.4247	1.0-1.49	28			430.769	0	0	0	0	0	0	20.5128	0	0	0	0	0	0	0	0	0	6.83761	0	0	0	0	0	0	0	0	6.83761	0	0	0	0	0	0
1218	PB Is	Gulf Is	2010	Post	20100915	6	11:07:00	3.1	3	0.155	30.2111	88.4267	1.0-1.49	28			787.097	0	0	0	0	0	0	12.9032	45.1613	0	0	0	0	0	0	0	0	38.7097	0	0	0	0	0	0	0	0	0	0	0	0	0	0	0
1220	PB Is	Gulf Is	2010	Post	20100915	8	11:25:00	3.8	2.5	0.158333	30.2105	88.43	1.0-1.49	28			189.474	0	0	0	0	0	0	0	0	0	0	0	0	0	0	0	0	0	0	0	0	0	6.31579	0	0	0	0	0	0	0	0	0	0
1221	PB Is	Gulf Is	2010	Post	20100915	9	11:37:00	3.8	2.5	0.158333	30.209	88.4324	1.0-1.49	28			334.737	0	0	0	0	0	0	6.31579	31.5789	6.31579	0	0	0	0	0	0	0	0	0	0	0	6.31579	0	0	0	0	0	0	0	0	0	0	0
1222	PB Is	Gulf Is	2010	Post	20100915	10	12:07:00	3.6	2	0.12	30.2083	88.4342	1.0-1.49	28			508.333	0	0	0	0	0	0	41.6667	25	0	0	0	0	0	0	0	0	25	0	0	0	0	0	0	0	0	0	0	0	0	0	0	0
1223	PB Is	Gulf Is	2010	Post	20100915	11	12:20:00	2.9	2	0.0966667	30.208	88.4372	1.0-1.49	28			279.31	0	0	0	0	0	0	0	0	10.3448	0	0	0	0	0	0	0	20.6897	0	0	0	0	0	0	0	0	10.3448	0	0	0	0	0	0
1224	PB Is	Gulf Is	2010	Post	20100915	12	12:30:00	4.4	2	0.146667	30.207	88.4365	1.0-1.49	28			463.636	0	0	0	0	0	0	6.81818	13.6364	0	0	0	0	0	0	0	0	6.81818	0	0	0	6.81818	0	0	0	0	0	0	0	0	0	0	0
1225	PB Is	Gulf Is	2010	Post	20100915	13	12:51:00	3.7	1.5	0.0925	30.2058	88.4379	1.0-1.49	28			216.216	0	0	0	0	0	0	43.2432	0	0	0	0	0	0	0	0	0	10.8108	0	0	0	0	0	0	0	0	0	0	0	0	0	0	0
1226	PB Is	Gulf Is	2010	Post	20100915	14	12:59:00	3.9	1.5	0.0975	30.205	88.439	1.0-1.49	28			225.641	0	0	0	0	0	0	10.2564	0	0	0	0	0	0	0	0	0	0	0	0	0	0	0	0	0	0	0	0	0	0	0	0	0
1227	PB Is	Gulf Is	2010	Post	20100915	15	13:06:00	3.8	1.5	0.095	30.2046	88.4397	1.0-1.49	28			1115.79	0	0	0	0	0	0	10.5263	0	0	0	0	0	0	0	0	0	0	0	0	0	0	0	0	0	0	10.5263	0	0	0	0	0	0
1228	PB Is	Gulf Is	2010	Post	20100915	16	13:16:00	4.1	2.25	0.15375	30.2027	88.4424	1.0-1.49	28			1847.15	0	0	0	0	0	0	26.0163	0	0	0	0	0	0	0	0	0	26.0163	0	0	0	0	0	0	0	0	6.50407	0	0	0	0	0	0
1229	PB Is	Gulf Is	2010	Post	20100915	17	13:33:00	3.9	2	0.13	30.2033	88.4481	1.0-1.49	28			776.923	0	0	0	0	0	0	0	0	0	0	0	0	0	0	0	0	0	0	0	0	0	0	0	0	0	0	0	0	0	0	0	0
1230	PB Is	Gulf Is	2010	Post	20100915	18	13:43:00	3.5	2	0.116667	30.2038	88.4517	1.0-1.49	28			857.143	0	0	0	0	0	0	0	42.8571	0	0	0	0	0	0	0	0	42.8571	0	0	0	0	0	0	0	0	0	0	0	0	0	0	0
1231	PB Is	Gulf Is	2010	Post	20100915	19	14:40:00	3.7	2	0.123333	30.2058	88.4385	1.0-1.49	28			608.108	0	0	0	0	0	0	8.10811	32.4324	0	0	0	0	0	0	0	0	8.10811	0	0	0	0	0	0	0	0	8.10811	0	0	0	0	0	0
1232	PB Is	Gulf Is	2010	Post	20100915	20	14:52:00	3.2	2	0.106667	30.2058	88.4377	1.0-1.49	28			496.875	0	0	0	0	0	0	150	0	0	0	0	0	0	0	0	0	9.375	0	0	0	0	0	0	0	0	0	0	0	0	0	0	0
1233	PB Is	Gulf Is	2010	Post	20100915	21	15:06:00	3.5	2	0.116667	30.208	88.4323	1.0-1.49	28			94.2857	0	0	0	0	0	8.57143	42.8571	0	0	0	0	0	0	0	0	0	0	0	0	0	0	0	0	0	0	0	0	0	0	0	0	0
1234	PAP	Miss Sound	2010	Post	20100915	22	16:09:00	2	1.5	0.05	30.3796	88.3111	<1.0	24			560	0	0	0	0	0	0	0	100	0	0	0	0	0	0	0	0	0	0	0	0	280	0	20	0	0	0	0	0	0	0	0	0
1235	PAP	Miss Sound	2010	Post	20100915	23	16:21:00	2.9	2	0.0966667	30.379	88.3114	<1.0	24			858.621	0	0	0	0	0	31.0345	0	331.034	0	0	0	0	0	0	0	0	10.3448	0	0	0	248.276	0	62.069	0	0	0	0	0	0	0	0	0
1236	PAP	Miss Sound	2010	Post	20100915	24	16:34:00	1.9	2	0.0633333	30.3772	88.3116	<1.0	24			442.105	0	0	0	0	0	0	0	15.7895	0	0	0	0	0	0	0	0	0	0	0	0	189.474	0	15.7895	0	0	0	0	0	0	0	0	0
1237	PAP	Miss Sound	2010	Post	20100915	25	16:45:00	2.8	2	0.0933333	30.3762	88.3122	<1.0	24			1682.14	0	0	0	0	0	32.1429	0	728.571	10.7143	0	0	0	0	0	0	0	10.7143	0	0	0	332.143	0	10.7143	0	0	0	0	0	0	0	0	0
1238	Mid Bay	Miss Sound	2010	Post	20100916	1	09:31:00	3.6	2	0.12	30.3508	88.4101	1.0-1.49	24			291.667	0	0	0	0	0	0	0	41.6667	0	0	0	0	0	0	0	0	0	0	0	0	0	0	0	0	0	0	0	0	0	0	0	0
1239	Mid Bay	Miss Sound	2010	Post	20100916	2	09:41:00	3.2	2	0.106667	30.3521	88.4094	1.0-1.49	24			1350	0	0	0	0	0	0	0	571.875	0	0	0	0	0	0	0	0	0	0	0	0	337.5	0	18.75	0	0	0	0	0	0	0	0	0
1240	Mid Bay	Miss Sound	2010	Post	20100916	3	09:54:00	2.8	2	0.0933333	30.3536	88.4099	1.0-1.49	24			1050	0	0	0	0	0	0	0	675	0	0	0	0	0	10.7143	0	0	0	0	0	0	171.429	0	0	0	0	0	0	0	0	0	0	0
1241	Mid Bay	Miss Sound	2010	Post	20100916	4	10:07:00	2.7	2	0.09	30.3551	88.4106	1.0-1.49	24			344.444	0	0	0	0	0	0	0	255.556	0	0	0	0	0	0	0	0	0	0	0	0	33.3333	0	0	0	0	0	0	0	0	0	0	0
1242	Mid Bay	Miss Sound	2010	Post	20100916	5	10:17:00	2.8	2	0.0933333	30.3563	88.4111	1.0-1.49	24			1221.43	0	0	0	0	0	0	10.7143	621.429	0	0	0	0	0	0	0	0	10.7143	0	0	0	364.286	0	0	0	0	0	0	0	0	0	0	0
1243	Mid Bay	Miss Sound	2010	Post	20100916	6	10:34:00	2.7	2	0.09	30.3572	88.4118	1.0-1.49	24			511.111	0	0	0	0	0	11.1111	0	233.333	0	0	0	0	0	0	0	0	0	0	0	0	111.111	0	0	0	0	0	0	0	0	0	0	0
1244	Mid Bay	Miss Sound	2010	Post	20100916	7	10:44:00	2.2	1.1	0.0403333	30.3583	88.4116	1.0-1.49	24		Add 1 pinfish	24.7934	0	0	0	0	0	0	0	0	0	0	0	0	0	0	0	0	0	0	0	0	0	0	0	0	0	0	0	0	0	0	0	0
1245	Mid Bay	Miss Sound	2010	Post	20100916	8	10:51:00	3	2	0.1	30.3585	88.4129	1.0-1.49	24			1860	0	0	0	0	0	0	0	1360	0	0	0	0	0	0	0	0	0	0	0	0	140	0	20	0	0	0	0	0	0	0	0	0
1246	Mid Bay	Miss Sound	2010	Post	20100916	9	11:38:00	3.4	2	0.113333	30.3835	88.3994	1.0-1.49	24			300	0	0	0	0	0	8.82353	17.6471	35.2941	0	0	0	0	0	0	0	0	0	0	0	0	44.1176	0	8.82353	0	0	0	0	0	0	0	0	0
1247	Mid Bay	Miss Sound	2010	Post	20100916	10	11:52:00	3.8	2	0.126667	30.3871	88.4066	1.0-1.49	24			63.1579	0	0	0	0	0	15.7895	0	7.89474	0	0	0	0	0	0	0	0	0	0	0	0	0	0	0	0	0	0	0	0	0	0	0	0
1248	DI	Gulf Is	2010	Post	20100916	11	12:44:00	3.9	2	0.13	30.2355	88.2805	1.0-1.49	26		No Grass	384.615	0	0	0	0	0	0	361.538	0	0	0	0	0	0	0	0	0	0	0	0	0	0	0	7.69231	0	0	0	0	0	0	0	0	0
1249	DI	Gulf Is	2010	Post	20100916	12	13:00:00	4.2	2	0.14	30.234	88.2908	1.0-1.49	26			314.286	0	0	0	0	0	0	14.2857	50	0	0	0	0	0	0	0	0	0	0	0	0	21.4286	0	7.14286	0	0	0	0	0	0	0	0	0
1250	DI	Gulf Is	2010	Post	20100916	13	13:09:00	3.2	2	0.106667	30.2334	88.2935	1.0-1.49	26			262.5	0	0	0	0	0	0	9.375	18.75	0	0	0	0	0	0	0	0	0	0	0	0	9.375	0	0	0	0	0	0	0	0	0	0	0
1251	DI	Gulf Is	2010	Post	20100916	14	13:19:00	3.5	2	0.116667	30.2335	88.2958	1.0-1.49	26			162.857	0	0	0	0	0	0	0	42.8571	0	0	0	0	0	0	0	0	0	8.57143	0	0	8.57143	0	8.57143	0	0	0	0	0	0	0	0	0
1252	DI	Gulf Is	2010	Post	20100916	15	13:32:00	2.8	2	0.0933333	30.2323	88.3001	1.0-1.49	26			685.714	0	0	0	0	0	0	10.7143	32.1429	0	0	0	0	0	0	0	0	10.7143	0	0	0	21.4286	0	0	0	0	0	0	0	0	0	0	0
1253	DI	Gulf Is	2010	Post	20100916	16	13:43:00	3.3	4	0.22	30.2319	88.3004	1.0-1.49	26			636.364	0	0	0	0	0	0	4.54545	222.727	0	0	0	0	0	0	0	0	0	0	0	0	18.1818	0	0	0	0	0	0	0	0	0	0	0
1254	DI	Gulf Is	2010	Post	20100916	17	13:59:00	3.7	2.5	0.154167	30.2319	88.3066	1.0-1.49	26			668.108	0	0	0	0	0	0	0	162.162	0	0	0	0	0	0	0	0	0	0	0	0	19.4595	0	0	0	0	0	0	0	0	0	0	0
1255	DI	Gulf Is	2010	Post	20100916	18	14:09:00	3.2	2	0.106667	30.2323	88.3095	1.0-1.49	26			56.25	0	0	0	0	0	0	0	0	0	0	0	0	0	0	0	0	0	0	0	0	0	0	0	0	0	0	0	0	0	0	0	0
1256	DI	Gulf Is	2010	Post	20100916	19	14:22:00	4	2	0.133333	30.2328	88.3202	1.0-1.49	26			7.5	0	0	0	0	0	0	0	0	0	0	0	0	0	0	0	0	0	0	0	0	0	0	7.5	0	0	0	0	0	0	0	0	0
1257	DI	Gulf Is	2010	Post	20100916	20	14:28:00	3.4	2	0.113333	30.2319	88.3217	1.0-1.49	26			8.82353	0	0	0	0	0	0	0	0	0	0	0	0	0	0	0	0	0	0	0	0	0	0	0	0	0	0	0	0	0	0	0	0
1258	Mid Bay	Miss Sound	2010	Post	20100917	1	10:49:00	3.7	2	0.123333	30.3509	88.4098	<1.0	26	26		1037.84	0	0	0	0	0	0	8.10811	478.378	0	0	0	0	0	0	0	0	0	0	0	0	40.5405	0	24.3243	0	0	0	0	0	0	0	0	0
1259	Mid Bay	Miss Sound	2010	Post	20100917	2	10:58:00	3	2	0.1	30.3525	88.4097	<1.0	26	26		1860	0	0	0	0	0	0	10	1040	0	0	0	0	0	0	0	0	0	0	0	0	460	0	40	0	0	0	0	0	0	0	0	0
1260	Mid Bay	Miss Sound	2010	Post	20100917	3	11:11:00	3.5	2	0.116667	30.354	88.4102	<1.0	26	26		480	0	0	0	0	0	0	17.1429	111.429	0	0	0	0	0	0	0	0	25.7143	0	0	0	180	0	51.4286	0	0	0	0	0	0	0	0	0
1261	Mid Bay	Miss Sound	2010	Post	20100917	4	11:25:00	3	2	0.1	30.355	88.4102	<1.0	26	26		170	0	0	0	0	0	0	0	120	0	0	0	0	0	0	0	0	0	0	0	0	30	0	0	0	0	0	0	0	0	0	0	0
1262	Mid Bay	Miss Sound	2010	Post	20100917	5	11:43:00	3.2	2	0.106667	30.3563	88.4112	<1.0	26	26		881.25	0	0	0	0	187.5	0	0	271.875	0	0	0	0	0	9.375	0	0	9.375	0	0	0	234.375	0	28.125	0	0	0	0	0	0	0	0	0
1263	Mid Bay	Miss Sound	2010	Post	20100917	6	11:59:00	3.1	2	0.103333	30.3583	88.4132	<1.0	26	26		754.839	0	0	0	0	0	0	19.3548	58.0645	0	0	0	0	0	0	0	0	9.67742	0	0	0	183.871	0	9.67742	0	0	0	0	0	0	0	0	0
1264	Mid Bay	Miss Sound	2010	Post	20100917	7	12:09:00	3	2	0.1	30.3581	88.4153	<1.0	26	26		390	0	0	0	0	0	0	0	100	0	0	0	0	0	0	0	0	0	0	0	0	80	0	0	0	0	0	0	0	0	0	0	0
1266	Horn Is	Gulf Is	2010	Post	20100917	9	13:20:00	4.1	2	0.136667	30.2428	88.6774	1.5-1.99	29	27	Heavy Drift Algae	1002.44	0	0	0	0	0	0	21.9512	285.366	0	0	0	0	0	0	0	0	21.9512	0	0	0	29.2683	0	7.31707	0	0	0	0	0	0	0	0	0
1267	Horn Is	Gulf Is	2010	Post	20100917	10	13:38:00	3.5	2.333	0.136092	30.2443	88.6802	1.5-1.99	29	27	Heavy Drift Algae	536.403	0	0	0	0	0	0	7.34799	169.004	0	0	0	0	0	0	0	0	22.044	0	0	0	14.696	0	0	0	0	0	0	0	0	0	0	0
1268	Horn Is	Gulf Is	2010	Post	20100917	11	13:57:00	3.6	2	0.12	30.2479	88.6945	1.5-1.99	29	27	Heavy Drift Algae	758.333	0	0	0	0	0	0	0	275	0	0	0	0	0	0	0	0	25	0	0	0	0	0	0	0	0	0	0	0	0	0	0	0
1269	Horn Is	Gulf Is	2010	Post	20100917	12	14:14:00	3.4	2	0.113333	30.2518	88.7076	1.5-1.99	29	27	Heavy Drift Algae	538.235	0	0	0	0	0	0	17.6471	70.5882	0	0	0	0	0	0	0	0	0	0	0	0	52.9412	0	0	0	0	0	0	0	0	0	0	0
1270	Horn Is	Gulf Is	2010	Post	20100917	13	14:27:00	3	2	0.1	30.2531	88.7107	1.5-1.99	29	27	Heavy Drift Algae	350	0	0	0	0	0	0	0	160	0	0	0	0	0	0	0	0	20	0	0	0	40	0	0	0	0	0	0	0	0	0	0	0
1271	Horn Is	Gulf Is	2010	Post	20100917	14	14:37:00	3.2	2.5	0.133333	30.2542	88.7123	1.5-1.99	29	27	Heavy Drift Algae	495	0	0	0	0	0	0	7.5	75	0	0	0	0	0	0	0	0	15	0	0	0	7.5	0	0	0	0	0	0	0	0	0	0	0
1272	Horn Is	Gulf Is	2010	Post	20100917	15	14:51:00	3.1	2	0.103333	30.2539	88.7195	1.5-1.99	29	27	Heavy Drift Algae	348.387	0	0	0	0	0	0	0	154.839	0	0	0	0	0	0	0	0	0	0	0	0	9.67742	0	0	0	0	0	0	0	0	0	0	0
1273	Horn Is	Gulf Is	2010	Post	20100917	16	15:05:00	3.4	2.5	0.141667	30.2495	88.7263	1.5-1.99	29	27	Heavy Drift Algae	1284.71	0	0	0	0	0	0	0	91.7647	0	0	0	0	0	0	0	0	28.2353	0	0	0	63.5294	0	0	0	0	7.05882	0	0	0	0	0	0
1274	Horn Is	Gulf Is	2010	Post	20100917	17	15:20:00	3.2	2	0.106667	30.2483	88.7281	1.5-1.99	29	27	Heavy Drift Algae	637.5	0	0	0	0	0	0	9.375	206.25	0	0	0	0	0	0	0	0	65.625	0	0	0	75	0	0	0	0	0	0	0	0	0	0	0
1275	Horn Is	Gulf Is	2010	Post	20100917	18	15:29:00	2.5	2	0.0833333	30.2487	88.7298	1.5-1.99	29	27	Heavy Drift Algae	648	0	0	0	0	0	0	0	156	0	0	0	0	0	0	0	0	12	0	0	0	48	0	0	0	0	0	0	0	0	0	0	0
1276	Horn Is	Gulf Is	2010	Post	20100917	19	15:41:00	2.4	1	0.04	30.2484	88.7314	1.5-1.99	29	27	Heavy Drift Algae	1100	0	0	0	0	0	0	0	100	0	0	0	0	0	0	0	0	475	0	0	0	50	0	0	0	0	0	0	0	0	0	0	0
1277	Horn Is	Gulf Is	2010	Post	20100917	20	16:02:00	2.9	2	0.0966667	30.2472	88.7357	1.5-1.99	29	27	Heavy Drift Algae	786.207	0	0	0	0	0	0	10.3448	144.828	0	0	0	0	0	0	0	0	20.6897	0	0	0	72.4138	0	0	0	0	0	0	0	0	0	0	0
1278	Chand Is	Chand Is	2010	Post	20101008	1	11:19:00	4	2	0.133333	29.8654	88.8419		30.6	22.1		757.5	0	0	0	0	0	37.5	0	262.5	0	0	0	0	0	0	0	0	0	0	0	0	52.5	0	0	0	0	0	0	0	0	0	0	0
1279	Chand Is	Chand Is	2010	Post	20101008	2	11:41:00	3.8	2	0.126667	29.8787	88.8402		30.6	22.1		900	0	0	0	0	0	63.1579	0	142.105	7.89474	0	0	0	0	0	0	0	0	0	0	0	31.5789	0	0	0	0	0	0	0	0	0	0	0
1280	Chand Is	Chand Is	2010	Post	20101008	3	11:53:00	3	2	0.1	29.8784	88.8462		30.6	22.1		370	0	0	0	0	0	0	0	40	10	0	0	0	0	0	0	0	10	0	0	0	0	0	0	0	0	0	0	0	0	0	0	0
1281	Chand Is	Chand Is	2010	Post	20101008	4	12:04:00	2.9	2	0.0966667	29.8785	88.8392		30.6	22.1		1344.83	0	0	0	0	0	51.7241	0	124.138	10.3448	0	0	0	0	0	0	0	0	0	0	0	51.7241	0	0	0	0	0	0	0	0	0	0	0
1282	Chand Is	Chand Is	2010	Post	20101008	5	12:31:00	3.2	2	0.106667	29.8883	88.846		30.3	23		1068.75	0	0	0	0	0	18.75	0	225	0	0	0	0	0	0	0	0	0	0	0	0	18.75	0	0	0	0	0	0	0	0	0	0	0
1283	Chand Is	Chand Is	2010	Post	20101008	6	12:57:00	3.7	2	0.123333	29.9046	88.8384		30.3	23		754.054	0	0	0	0	0	24.3243	0	178.378	0	0	0	0	0	0	0	0	0	0	0	0	97.2973	0	0	0	0	0	0	0	0	0	0	0
1284	Chand Is	Chand Is	2010	Post	20101008	7	13:07:00	3.4	2	0.113333	29.9096	88.8391		30.3	23		1252.94	0	0	0	0	0	52.9412	0	370.588	61.7647	0	0	0	0	0	0	0	8.82353	0	0	0	150	0	0	0	0	0	0	0	0	0	0	0
1285	Chand Is	Chand Is	2010	Post	20101008	8	13:15:00	3.7	2	0.123333	29.9111	88.8405		30.3	23		1297.3	0	0	0	0	0	16.2162	0	405.405	40.5405	0	0	0	0	0	0	0	8.10811	0	0	0	48.6486	0	0	0	0	0	0	0	0	0	0	0
1286	Chand Is	Chand Is	2010	Post	20101008	9	13:27:00	3.8	2	0.126667	29.9124	88.8341		30.3	23		789.474	0	0	0	0	0	47.3684	0	110.526	7.89474	0	0	0	0	0	0	0	0	0	0	0	7.89474	0	0	0	0	0	0	0	0	0	0	0
1287	Chand Is	Chand Is	2010	Post	20101008	10	13:36:00	3.5	2	0.116667	29.9142	88.8319		30.3	23		325.714	0	0	0	0	0	0	0	51.4286	8.57143	0	0	0	0	0	0	0	0	0	0	0	17.1429	0	0	0	0	0	0	0	0	0	0	0
[truncated: 54 more columns]
